# Supplementary material for: Transcriptomics analysis of ethanol treatment of male Aedes aegypti reveals a small set of putative radioprotective genes
Source: Front Physiol. 2023 Jan 30;14:1120408. doi: 10.3389/fphys.2023.1120408 (PMC9922702; doi:10.3389/fphys.2023.1120408)
Supplement: Supplementary file 1 [file Table2.XLSX]

## Sheet: allSig_deSeqRes_ETOHc_by_H2Oc
	VectorBase ID	EntrezGene ID	Name	EtOHcontrol1	EtOHcontrol2	EtOHcontrol3	EtOHcontrol4	H2Ocontrol1	H2Ocontrol2	H2Ocontrol3	H2Ocontrol4	baseMean	log2FoldChange	lfcSE	stat	pvalue	padj	significant
18	AAEL004471-RB	5564882	transmembrane GTPase Marf	281.537	112.25	118.36	75.6876	0	0	0	0	73.4794	-9.63893	1.14751	-8.39986	4.47e-17	1.1e-12	yes
10	AAEL002658-RC	5575571	4-coumarate--CoA ligase 1	49.7544	70.6471	151.296	0	0	0	0	0	33.9621	-8.52793	1.96616	-4.33734	1.44e-05	0.00937472	yes
59	AAEL019576-RH	5564736	filamin-B	0	85.5614	143.062	35.0747	0	0	0	0	32.9622	-8.48534	1.94961	-4.35233	1.35e-05	0.00899283	yes
75	AAEL027751-RB	5569462	tubulin polyglutamylase TTLL5	35.1921	74.5719	18.526	129.223	0	0	0	0	32.1891	-8.45273	1.29856	-6.50929	7.55e-11	4.66e-07	yes
62	AAEL019833-RAD	5566385	zinc finger protein 420	21.8434	43.1732	91.6007	19.3834	0	0	0	0	22.0001	-7.90201	1.29221	-6.1151	9.65e-10	3.41e-06	yes
60	AAEL019605-RE	5577563	polypeptide N-acetylgalactosaminyltransferase 5	0	39.2484	56.6072	42.4589	0	0	0	0	17.2893	-7.55491	1.96556	-3.84364	0.000121223	0.0415895	yes
70	AAEL025268-RK	5572228	heterogeneous nuclear ribonucleoprotein L	29.1245	27.4739	36.0227	38.7668	0	0	0	0	16.4235	-7.47974	1.0897	-6.86403	6.69e-12	8.27e-08	yes
65	AAEL020609-RA	5577668	aminopeptidase N	2.42704	38.4634	53.5195	18.4604	0	0	0	0	14.1088	-7.2628	1.55469	-4.67156	2.99e-06	0.00255412	yes
26	AAEL006948-RE	5568540	syntaxin-binding protein 5	30.338	9.41961	34.9935	11.9993	0	0	0	0	10.8438	-6.87458	1.31173	-5.24085	1.6e-07	0.00019742	yes
73	AAEL026043-RC	5575639	5-hydroxytryptamine receptor 2B	30.338	13.3444	18.526	23.0755	0	0	0	0	10.6605	-6.84852	1.17297	-5.83859	5.26e-09	1.44e-05	yes
8	AAEL002571-RE	5580170	band 4.1-like protein 4	26.6975	18.0542	1.02922	11.0762	0	0	0	0	7.10715	-6.26966	1.64925	-3.80152	0.00014381	0.0480052	yes
11	AAEL002998-RC	5580263	histone-lysine N-methyltransferase setd3	12.1352	3.13987	31.9059	5.53812	0	0	0	0	6.58988	-6.15793	1.57793	-3.90253	9.52e-05	0.0352524	yes
57	AAEL019466-RF	5566648	protein mothers against dpp	25.4839	7.84967	6.17533	6.46114	0	0	0	0	5.74626	-5.95382	1.42442	-4.17981	2.92e-05	0.0148174	yes
24	AAEL005599-RC	5566742	Down syndrome cell adhesion molecule	8.49465	8.63464	8.23377	11.0762	0	0	0	0	4.55491	-5.6315	1.20565	-4.67092	3e-06	0.00255412	yes
76	AAEL027978-RAA	5573626	Down syndrome cell adhesion molecule-like protein Dscam2	6.0676	3.92484	6.17533	11.9993	0	0	0	0	3.52088	-5.2574	1.35001	-3.89433	9.85e-05	0.0352524	yes
53	AAEL017116-RC	23687536	hrp65 protein	430.8	134.229	189.377	263.984	0	31.5104	24.6499	15.8256	136.297	-3.82253	0.750947	-5.09028	3.58e-07	0.000367986	yes
27	AAEL007146-RM	5568795	potassium voltage-gated channel protein Shaw	35.1921	61.2274	33.9643	27.6906	8.44461	6.09878	7.84315	9.16218	23.7029	-2.32736	0.44632	-5.21456	1.84e-07	0.000212098	yes
47	AAEL013713-RG	5575687	beta-arrestin-1	180.815	80.0667	92.6299	68.3034	29.5561	24.3951	30.2522	50.8084	69.6033	-1.63094	0.400151	-4.07581	4.59e-05	0.0213714	yes
71	AAEL025597-RC	5570472	proton-coupled amino acid transporter-like protein CG1139	128.633	76.9268	80.2793	103.378	28.5006	49.8067	39.2158	20.8231	65.9455	-1.49599	0.324245	-4.61375	3.95e-06	0.00325625	yes
25	AAEL006650-RT	5568207	voltage-gated potassium channel subunit beta-1	43.6868	29.0438	36.0227	44.3049	16.8892	17.2799	13.4454	12.4939	26.6458	-1.34583	0.321759	-4.18274	2.88e-05	0.0148174	yes
7	AAEL001561-RI	5571276	splicing factor 3A subunit 2	43.6868	69.0771	63.8117	87.6869	25.3338	37.6092	26.8908	26.6536	47.5937	-1.19007	0.294718	-4.03801	5.39e-05	0.0236446	yes
46	AAEL013431-RR	5577947	proline dehydrogenase 1, mitochondrial	173.533	143.649	112.185	228.909	61.2234	52.8561	68.3475	107.447	118.519	-1.17787	0.305998	-3.84927	0.000118469	0.0412173	yes
49	AAEL014041-RB	5577722	rho GTPase-activating protein gacF	55.822	73.002	68.9578	72.9185	32.7229	14.2305	38.0953	34.9829	48.8415	-1.17688	0.30838	-3.81633	0.00013545	0.0458341	yes
29	AAEL007658-RK	5569475	partitioning defective 3 homolog	104.363	172.693	122.477	145.837	59.1123	92.4982	40.3362	63.3023	100.077	-1.09686	0.281255	-3.89988	9.62e-05	0.0352524	yes
9	AAEL002595-RB	5575329	tryptase-2	78.8789	54.1627	73.0747	49.8431	24.2783	32.5268	28.0113	34.9829	46.9698	-1.07795	0.264355	-4.07766	4.55e-05	0.0213714	yes
68	AAEL024696-RB	110673997	sorbitol dehydrogenase-like	615.255	456.851	544.458	604.578	166.781	231.754	339.497	350.662	413.729	-1.02707	0.241586	-4.25137	2.12e-05	0.0124962	yes
36	AAEL009387-RB	5571932	hexokinase type 2	726.899	887.798	930.416	728.262	416.953	250.05	554.623	435.62	616.328	-0.982692	0.229064	-4.29004	1.79e-05	0.0110321	yes
54	AAEL017297-RB	23687717	probable cytochrome P450 6a14	104.363	101.261	96.7468	94.148	55.9456	57.9384	77.3111	63.3023	81.377	-0.641875	0.161288	-3.97968	6.9e-05	0.0279447	yes
14	AAEL003347-RA	5577908	alpha-tocopherol transfer protein-like	884.657	1079.33	1190.81	1029.17	728.348	669.85	602.802	712.984	862.243	-0.624674	0.11147	-5.60394	2.1e-08	3.98e-05	yes
12	AAEL003117-RC	5577144	peroxisomal targeting signal 2 receptor	200.231	151.499	141.003	185.527	103.447	120.959	100.841	114.111	139.702	-0.619496	0.157343	-3.93724	8.24e-05	0.0323176	yes
20	AAEL005221-RF	5566166	leucine-rich repeat-containing protein 58	612.828	568.316	577.393	679.342	351.507	495.018	341.737	449.78	509.49	-0.571691	0.14286	-4.00176	6.29e-05	0.0263232	yes
41	AAEL010479-RD	5573437	facilitated trehalose transporter Tret1	166.252	165.628	150.266	133.838	115.058	101.646	100.841	103.283	129.602	-0.549126	0.131076	-4.18936	2.8e-05	0.0148174	yes
66	AAEL022867-RA	5573302	1-acyl-sn-glycerol-3-phosphate acyltransferase delta	760.878	577.736	610.328	640.576	481.343	511.281	413.446	410.632	550.778	-0.509601	0.122071	-4.17463	2.98e-05	0.0148174	yes
4	AAEL000735-RA	5566281	probable peroxisomal acyl-coenzyme A oxidase 1	361.629	331.256	321.117	332.287	213.226	242.935	263.306	245.713	288.934	-0.477723	0.0918399	-5.20169	1.97e-07	0.000212098	yes
23	AAEL005515-RI	5579810	RNA-binding protein squid	1344.58	1325.81	1440.91	1498.98	1182.25	1125.23	1030.81	1215.24	1270.48	-0.299947	0.0752621	-3.98536	6.74e-05	0.0277396	yes
35	AAEL009129-RB	5571544	probable cytochrome P450 6d4	1140.71	1260.66	1120.82	1180.54	937.352	969.707	1022.97	1006.17	1079.87	-0.258583	0.0609289	-4.244	2.2e-05	0.0126134	yes
2	AAEL000564-RK	5564303	myotubularin-related protein 3	808.205	827.356	803.822	752.261	677.68	681.031	676.752	692.994	740.013	-0.225733	0.0559412	-4.03518	5.46e-05	0.0236446	yes
31	AAEL008289-RB	5570388	pupal cuticle protein Edg-78E	4970.58	5105.43	5049.36	5191.98	4359.53	4771.28	4568.08	4474.47	4811.34	-0.161315	0.040583	-3.97494	7.04e-05	0.028047	yes
74	AAEL026946-RC	110678647	C-myc promoter-binding protein	543.657	548.692	525.932	549.197	685.069	663.751	684.595	637.188	604.76	0.298203	0.0587823	5.07301	3.92e-07	0.000386909	yes
33	AAEL008680-RB	5570952	ubiquitin-related modifier 1 homolog	665.009	665.652	723.543	653.498	1023.91	906.686	795.52	872.906	788.34	0.410892	0.0913257	4.49919	6.82e-06	0.00538495	yes
55	AAEL017357-RC	23687777	E3 ubiquitin-protein ligase TRIP12	293.672	270.814	322.146	314.75	409.564	422.849	433.614	401.47	358.61	0.474421	0.0834556	5.68471	1.31e-08	3.24e-05	yes
50	AAEL014551-RB	5564668	pancreatic lipase-related protein 2	404.102	361.085	367.432	404.283	581.623	500.1	573.671	605.537	474.729	0.560076	0.0886567	6.31735	2.66e-10	1.1e-06	yes
13	AAEL003203-RC	5577524	acyl-CoA Delta(11) desaturase	2496.21	2685.37	3042.38	3333.02	5150.16	4312.86	3694.13	4258.75	3621.61	0.591489	0.134305	4.40406	1.06e-05	0.00749832	yes
5	AAEL000898-RB	5567220	glutactin	114.071	103.616	89.5422	93.225	171.003	148.404	165.827	157.423	130.389	0.684988	0.128101	5.34727	8.93e-08	0.000147044	yes
32	AAEL008543-RB	5570780	cdc42 homolog	182.028	204.091	252.159	158.759	276.561	319.17	388.796	354.826	267.049	0.748888	0.174415	4.29371	1.76e-05	0.0110321	yes
22	AAEL005400-RA	5566474	C-terminal-binding protein	337.359	244.125	226.429	252.907	472.898	512.298	503.082	330.671	359.971	0.779316	0.186729	4.17352	3e-05	0.0148174	yes
42	AAEL011329-RC	5574692	uncharacterized LOC5574692	98.2952	141.294	126.594	131.992	197.393	206.342	266.667	220.725	173.663	0.828921	0.15596	5.31498	1.07e-07	0.000154999	yes
58	AAEL019567-RN	5568502	ensconsin	433.227	261.394	286.123	230.755	814.905	639.356	574.791	452.278	461.604	1.03654	0.246071	4.21237	2.53e-05	0.014187	yes
34	AAEL008916-RH	5571223	potassium channel subfamily T member 2	26.6975	27.4739	18.526	20.3064	57.0011	48.7903	44.818	44.145	35.9698	1.06169	0.260846	4.07019	4.7e-05	0.0214885	yes
15	AAEL003627-RC	5578663	sodium-dependent nutrient amino acid transporter 1	27.911	18.8392	27.789	35.0747	62.279	42.6915	69.4679	64.1353	43.5235	1.12969	0.289316	3.90471	9.43e-05	0.0352524	yes
16	AAEL003991-RD	5563901	reticulon-4-interacting protein 1 homolog, mitochondrial	46.1138	34.5386	37.052	43.3819	79.1683	88.4324	107.563	89.9559	65.7758	1.18936	0.196487	6.05315	1.42e-09	4.39e-06	yes
1	AAEL000289-RB	5573747	ankyrin repeat, SAM and basic leucine zipper domain-containing protein 1	47.3273	32.1837	50.4318	26.7676	105.558	84.3665	90.7565	124.939	70.2912	1.38965	0.263023	5.28336	1.27e-07	0.000174056	yes
37	AAEL009495-RB	5572083	DENN domain-containing protein 5A	16.9893	15.6993	23.6721	10.1532	71.7792	50.8232	39.2158	55.806	35.5173	1.72088	0.351629	4.89403	9.88e-07	0.000938596	yes
17	AAEL004098-RJ	5564135	hemicentin-1	25.4839	13.3444	14.4091	8.30718	69.6681	55.9055	57.143	33.317	34.6973	1.83176	0.417836	4.38392	1.17e-05	0.00799802	yes
3	AAEL000661-RE	5565437	protein pangolin	1.21352	0	0	0	4.22231	10.1646	7.84315	13.3268	4.5963	4.91792	1.26733	3.88054	0.000104226	0.0367798	yes
43	AAEL011332-RC	5574699	MOXD1 homolog 2	0	3.92484	0	0	43.2786	30.4939	26.8908	50.8084	19.4246	5.0666	0.922945	5.4896	4.03e-08	7.11e-05	yes
38	AAEL009704-RG	5572317	USP6 N-terminal-like protein	0	0	0	0	6.33346	11.1811	12.325	3.3317	4.1464	5.52293	1.37466	4.01767	5.88e-05	0.0250325	yes
61	AAEL019706-RA	5566409	uncharacterized LOC5566409	0	0	0	0	9.50019	5.08232	12.325	9.9951	4.61282	5.68307	1.26447	4.49442	6.98e-06	0.00538495	yes
40	AAEL009980-RB	5572399	uncharacterized LOC5572399	0	0	0	0	5.27788	7.11525	15.6863	12.4939	5.07166	5.82149	1.31261	4.43504	9.21e-06	0.00668811	yes
63	AAEL019977-RA	5570339	triple functional domain protein	0	0	0	0	5.27788	11.1811	26.8908	9.16218	6.564	6.18896	1.39172	4.447	8.71e-06	0.00651816	yes
28	AAEL007189-RF	5570471	nocturnin	0	0	0	0	13.7225	14.2305	23.5295	15.8256	8.4135	6.54853	1.16403	5.62576	1.85e-08	3.8e-05	yes
48	AAEL013842-RB	5578727	rabenosyn-5	0	0	0	0	22.1671	20.3293	10.0841	24.1548	9.59191	6.74489	1.19181	5.65938	1.52e-08	3.41e-05	yes
56	AAEL019443-RH	5571255	potassium voltage-gated channel subfamily H member 6	0	0	0	0	24.2783	24.3951	25.7704	25.8207	12.5331	7.12673	1.09222	6.525	6.8e-11	4.66e-07	yes
21	AAEL005256-RC	5566239	flocculation protein FLO11	0	0	0	0	46.4454	16.2634	36.9749	6.6634	13.2934	7.20806	1.38518	5.20369	1.95e-07	0.000212098	yes
39	AAEL009949-RC	5572675	homeotic protein Sex combs reduced	0	0	0	0	19.0004	60.9878	7.84315	29.9853	14.7271	7.36045	1.37996	5.33381	9.62e-08	0.000148483	yes
44	AAEL011703-RF	5575243	NAD kinase 2, mitochondrial	0	0	0	0	12.6669	17.2799	88.5156	17.4914	16.9942	7.56324	1.44122	5.24781	1.54e-07	0.00019742	yes
51	AAEL015118-RJ	5573995	la-related protein CG11505	0	0	0	0	48.5565	0	53.7816	34.9829	17.1651	7.57983	1.99747	3.79472	0.000147809	0.0485558	yes
72	AAEL025718-RB	5566416	vanin-like protein 2	0	0	0	0	21.1115	0	39.2158	102.45	20.3471	7.8263	2.06385	3.79208	0.00014939	0.0485558	yes
69	AAEL025030-RA	5564068	uncharacterized LOC5564068	0	0	0	0	63.3346	0	79.552	24.9878	20.9843	7.86937	2.01504	3.90532	9.41e-05	0.0352524	yes
45	AAEL012513-RU	5576419	calcium-binding protein E63-1	0	0	0	0	23.2227	47.7738	21.2886	77.4621	21.2184	7.88979	1.23975	6.36403	1.97e-10	9.71e-07	yes
52	AAEL015118-RT	5573995	la-related protein CG11505	0	0	0	0	61.2234	31.5104	0	95.7864	23.565	8.03804	1.98002	4.05958	4.92e-05	0.0220796	yes
67	AAEL023148-RE	5572167	filamin-A	1.21352	0	0	0	138.281	106.729	0	96.6193	42.8553	8.17386	1.73178	4.71992	2.36e-06	0.00215861	yes
30	AAEL007765-RE	5569575	serine protease inhibitor 42Dd	0	0	0	0	0	56.922	63.8657	96.6193	27.1759	8.24336	1.9383	4.25287	2.11e-05	0.0124962	yes
6	AAEL001367-RB	5570350	72 kDa inositol polyphosphate 5-phosphatase	0	0	0	0	0	37.6092	116.527	64.9682	27.388	8.25405	1.97116	4.18741	2.82e-05	0.0148174	yes
64	AAEL020502-RA	5568917	elongation of very long chain fatty acids protein AAEL008004	0	0	0	0	77.0571	0	6.7227	159.089	30.3586	8.40336	2.15679	3.89623	9.77e-05	0.0352524	yes
19	AAEL005147-RC	5566047	DNA-binding protein D-ETS-4	0	0	0	0	135.114	16.2634	0	97.4523	31.1037	8.43801	2.03586	4.1447	3.4e-05	0.0164807	yes
