# Supplementary material for: Transcriptomics analysis of ethanol treatment of male Aedes aegypti reveals a small set of putative radioprotective genes
Source: Front Physiol. 2023 Jan 30;14:1120408. doi: 10.3389/fphys.2023.1120408 (PMC9922702; doi:10.3389/fphys.2023.1120408)
Supplement: Supplementary file 2 [file Table3.XLSX]

## Sheet: allSig_deSeqRes_H2Oc_by_H2Ox
	Row.names	EntrezGene ID	Name	H2Ocontrol1	H2Ocontrol2	H2Ocontrol3	H2Ocontrol4	H2Oxray1	H2Oxray2	H2Oxray3	H2Oxray4	baseMean	log2FoldChange	lfcSE	stat	pvalue	padj	significant
601	AAEL022609-RC	5566824	PDZ and LIM domain protein Zasp	0	0	0	0	0	363.417	94.8287	130.872	73.6396	9.74283	2.81866	3.45655	0.000547134	0.0227481	yes
89	AAEL002658-RC	5575571	4-coumarate--CoA ligase 1	0	0	0	0	0	216.293	134.428	111.525	57.7808	9.39293	2.71305	3.46213	0.000535916	0.0223488	yes
384	AAEL011254-RC	5574618	aprataxin and PNK-like factor	0	0	0	0	85.6685	10.9794	44.8092	63.7288	25.6482	8.22255	1.30128	6.31881	2.64e-10	4.11e-08	yes
191	AAEL006071-RJ	5577246	tyrosine-protein phosphatase 99A	0	0	0	0	0	27.4484	34.3884	138.838	25.0843	8.18861	2.04795	3.99844	6.38e-05	0.00392437	yes
5	AAEL000193-RB	5570016	N-lysine methyltransferase KMT5A-B	0	0	0	0	52.8593	0	31.2622	104.697	23.6024	8.10128	1.9709	4.11046	3.95e-05	0.00262832	yes
550	AAEL019939-RB	5577073	supervillin	0	0	0	0	48.3025	52.7009	33.3464	48.9346	22.9105	8.05807	1.08076	7.45594	8.92e-14	1.82e-11	yes
227	AAEL007004-RH	5568657	protein bride of sevenless	0	0	0	0	81.1117	0	19.7994	67.1428	21.0067	7.93368	2.00766	3.9517	7.76e-05	0.00464994	yes
311	AAEL009093-RB	5571458	protein crumbs	0	0	0	0	17.316	37.3298	108.376	0	20.3777	7.88954	2.05509	3.83902	0.000123528	0.00695365	yes
580	AAEL021554-RB	5574982	uncharacterized LOC5574982	0	0	0	0	15.4932	97.7162	48.9775	0	20.2734	7.88187	2.046	3.85232	0.000117002	0.00664114	yes
206	AAEL006539-RF	5568100	serine/threonine-protein kinase 3	0	0	0	0	82.023	31.8401	4.16829	29.5884	18.4525	7.74788	1.49348	5.18781	2.13e-07	2.3e-05	yes
539	AAEL019806-RA	5574178	CTL-like protein 2	0	0	0	0	30.0751	95.5204	10.4207	0	17.002	7.62811	2.12786	3.58487	0.000337243	0.0156976	yes
527	AAEL019654-RA	5567245	IQ motif and SEC7 domain-containing protein 1	0	0	0	0	78.3776	19.7628	0	31.8644	16.2506	7.56372	2.05812	3.67507	0.000237788	0.0120271	yes
566	AAEL020779-RA	110677274	uncharacterized LOC110677274	0	0	0	0	18.2273	38.4277	39.5988	28.4504	15.588	7.50056	1.15144	6.51404	7.32e-11	1.19e-08	yes
387	AAEL011254-RG	5574618	aprataxin and PNK-like factor	0	0	0	0	38.2774	27.4484	43.7671	11.3801	15.1091	7.46031	1.24102	6.01145	1.84e-09	2.46e-07	yes
216	AAEL006876-RD	5568453	insulin-like growth factor 2 mRNA-binding protein 1	0	0	0	0	30.0751	0	27.0939	61.4528	14.8277	7.43059	2.01731	3.68342	0.000230124	0.0117854	yes
542	AAEL019833-RAQ	5566385	zinc finger protein 420	0	0	0	0	38.2774	14.2732	27.0939	38.6925	14.7921	7.42856	1.19107	6.23688	4.46e-10	6.52e-08	yes
575	AAEL021318-RB	110674772	amyloid beta A4 precursor protein-binding family A member 2-like	0	0	0	0	30.0751	51.603	0	20.4843	12.7703	7.2152	2.04411	3.52975	0.000415945	0.0184369	yes
197	AAEL006350-RB	5567897	uncharacterized LOC5567897	0	0	0	0	18.2273	0	52.1037	30.7264	12.6322	7.19957	2.04541	3.51987	0.000431765	0.0190144	yes
528	AAEL019677-RF	5577752	graves disease carrier protein homolog	0	0	0	0	0	51.603	10.4207	38.6925	12.5895	7.19367	2.12602	3.38364	0.00071532	0.0278947	yes
329	AAEL009604-RG	5572193	receptor expression-enhancing protein 5	0	0	0	0	19.1387	28.5463	46.8933	0	11.8223	7.10429	2.0349	3.49123	0.000480811	0.0205972	yes
62	AAEL001915-RF	5572795	uncharacterized LOC5572795	0	0	0	0	17.316	26.3504	26.0518	23.8983	11.7021	7.08651	1.12816	6.28149	3.35e-10	4.97e-08	yes
511	AAEL018313-RE	5577336	tight junction protein ZO-1	0	0	0	0	37.366	20.8608	33.3464	0	11.4466	7.05839	2.01904	3.49592	0.000472436	0.0203566	yes
645	AAEL025268-RK	5572228	heterogeneous nuclear ribonucleoprotein L	0	0	0	0	39.1888	28.5463	13.547	0	10.1603	6.88652	2.06237	3.33913	0.000840427	0.0316267	yes
685	AAEL028037-RD	5565300	trafficking kinesin-binding protein milt	0	0	0	0	0	27.4484	15.6311	35.2784	9.79474	6.83123	2.08378	3.27829	0.00104439	0.0358672	yes
497	AAEL017526-RC	23687946	serine/arginine repetitive matrix protein 1	0	0	0	0	20.9614	28.5463	0	25.0363	9.31801	6.76028	2.04025	3.31345	0.00092151	0.0332101	yes
187	AAEL005843-RF	5579840	mediator of RNA polymerase II transcription subunit 12	0	0	0	0	0	21.9587	34.3884	18.2082	9.31942	6.75995	2.07945	3.25084	0.00115066	0.038562	yes
292	AAEL008679-RE	5570947	alpha-tubulin N-acetyltransferase	0	0	0	0	30.0751	0	12.5049	27.3123	8.73654	6.66824	2.07017	3.22112	0.00127693	0.0412614	yes
582	AAEL021618-RD	5576900	fasciclin-1	0	0	0	0	30.0751	18.6649	0	19.3462	8.51078	6.6304	2.05715	3.22311	0.00126807	0.0411299	yes
615	AAEL023226-RA	110678975	uncharacterized LOC110678975	0	0	0	0	10.9364	28.5463	28.136	0	8.45234	6.61997	2.07631	3.18833	0.00143097	0.0449162	yes
536	AAEL019779-RA	5569385	autophagy-related protein 16-1	0	0	0	0	18.2273	6.58761	35.4305	5.69007	8.24194	6.58567	1.47865	4.45385	8.43e-06	0.000668017	yes
164	AAEL005106-RD	5566009	nicotinamide riboside kinase 1	0	0	0	0	5.4682	30.7422	11.4628	13.6562	7.66617	6.47568	1.39641	4.63737	3.53e-06	0.000305535	yes
507	AAEL018280-RC	5579519	blastoderm-specific protein 25D	0	0	0	0	10.9364	7.68555	28.136	13.6562	7.55176	6.45738	1.32344	4.87924	1.06e-06	0.000103626	yes
275	AAEL008167-RC	5570205	fumarate hydratase, mitochondrial	0	0	0	0	14.5819	10.9794	10.4207	14.7942	6.34702	6.20748	1.19252	5.20533	1.94e-07	2.12e-05	yes
159	AAEL004918-RC	5565690	brain tumor protein	0	1.89069	0	0	19.1387	20.8608	37.5147	22.7603	12.7706	5.74155	1.13525	5.05751	4.25e-07	4.43e-05	yes
66	AAEL002080-RF	5573393	uncharacterized LOC5573393	4.96199	0	0	0	48.3025	68.072	67.7348	45.5206	29.324	5.60138	0.82874	6.75891	1.39e-11	2.43e-09	yes
302	AAEL008916-RG	5571223	potassium channel subfamily T member 2	0	0	0	8.5707	35.5433	24.1546	53.1458	38.6925	20.0134	4.08458	1.27215	3.21078	0.00132377	0.0424646	yes
410	AAEL011801-RA	5575396	uncharacterized LOC5575396	2.97719	3.78138	6.2572	5.45408	67.4412	69.1699	75.0293	71.6949	37.7256	3.93212	0.380122	10.3444	4.44e-25	1.35e-22	yes
119	AAEL003726-RA	5578868	uncharacterized LOC5578868	26.7948	19.8523	19.8145	21.8163	340.851	305.226	300.117	289.056	165.441	3.80951	0.180331	21.1251	4.67e-99	9.55e-96	yes
476	AAEL014348-RE	5564196	caspase	0	0	4.17146	3.11662	15.4932	5.48968	33.3464	38.6925	12.5387	3.66584	1.109	3.30554	0.000947944	0.0338097	yes
626	AAEL023973-RA	110675157	serine/threonine-protein phosphatase 6 regulatory ankyrin repeat subunit A-like	4.96199	0	1.04287	3.11662	40.1002	17.567	25.0098	33.0024	15.6001	3.65295	0.734536	4.97315	6.59e-07	6.7e-05	yes
118	AAEL003684-RA	5578760	X-ray repair cross-complementing protein 5	98.2474	86.9718	102.201	95.0568	1241.28	1014.49	1123.36	1122.08	610.461	3.55971	0.110712	32.1528	8.07e-227	1.65e-222	yes
473	AAEL014250-RA	5563946	replication protein A 32 kDa subunit	41.6807	74.6823	49.0147	57.6574	685.348	541.282	657.549	677.119	348.042	3.51674	0.172399	20.3989	1.71e-92	2.69e-89	yes
404	AAEL011649-RA	5575094	helicase POLQ-like	0	0	15.643	7.79154	61.0616	60.3864	79.1976	61.4528	35.6916	3.48675	1.01117	3.44823	0.000564275	0.0232937	yes
6	AAEL000276-RB	5573755	protein mahjong	10.9164	2.83604	0	8.5707	20.0501	99.9121	60.4403	59.1767	32.7378	3.40984	0.817265	4.17226	3.02e-05	0.00210881	yes
492	AAEL017116-RC	23687536	hrp65 protein	0	29.3057	22.9431	14.8039	58.3275	303.03	296.991	45.5206	96.3652	3.39201	0.938903	3.61273	0.000302985	0.0144993	yes
79	AAEL002273-RB	5574105	serine protease snake	0	2.83604	0	5.45408	20.0501	35.1339	15.6311	14.7942	11.7374	3.30239	0.951887	3.46931	0.0005218	0.0218942	yes
676	AAEL027493-RA	5567655	uncharacterized LOC5567655	23.8176	37.8138	29.2003	42.0743	318.067	311.814	350.137	345.956	182.36	3.29771	0.164096	20.0963	7.96e-90	1.16e-86	yes
385	AAEL011254-RD	5574618	aprataxin and PNK-like factor	64.5059	45.3766	37.5432	63.1115	534.972	378.788	654.422	475.69	281.801	3.2738	0.23386	13.999	1.58e-44	8.5e-42	yes
433	AAEL012545-RA	5580247	proliferating cell nuclear antigen	34.7339	42.5405	37.5432	52.2033	382.774	373.298	428.292	432.445	222.979	3.25739	0.15061	21.628	9.79e-104	3.65e-100	yes
386	AAEL011254-RF	5574618	aprataxin and PNK-like factor	128.019	128.567	127.23	179.205	1460.01	1170.4	1375.54	1193.78	720.343	3.20098	0.145321	22.0269	1.59e-107	8.13e-104	yes
540	AAEL019807-RA	5568064	uncharacterized LOC5568064	42.6731	72.7916	55.2719	68.5656	534.061	508.344	564.804	603.148	306.207	3.19737	0.15111	21.1593	2.27e-99	5.15e-96	yes
383	AAEL011254-RB	5574618	aprataxin and PNK-like factor	79.3919	121.95	85.515	166.739	1110.05	844.312	907.646	1157.36	559.12	3.14133	0.241693	12.9972	1.27e-38	5.76e-36	yes
469	AAEL014055-RB	5579214	deoxynucleoside kinase	13.8936	19.8523	26.0717	15.5831	181.362	113.087	213.625	145.666	91.1426	3.12701	0.303052	10.3184	5.82e-25	1.75e-22	yes
405	AAEL011649-RB	5575094	helicase POLQ-like	26.7948	38.7592	10.4287	26.4912	204.146	189.943	230.298	245.811	121.584	3.0772	0.290096	10.6075	2.75e-26	8.78e-24	yes
603	AAEL022683-RA	110675550	uncharacterized LOC110675550	1.9848	4.72673	0	5.45408	10.025	32.9381	27.0939	28.4504	13.8341	2.97384	0.778609	3.81943	0.000133761	0.0073872	yes
236	AAEL007291-RA	5569011	uncharacterized LOC5569011	42.6731	98.3159	63.6148	106.744	557.757	574.22	717.989	542.833	338.018	2.93562	0.264208	11.111	1.11e-28	3.78e-26	yes
276	AAEL008178-RA	5570235	probable DNA helicase MCM9	25.8024	21.7429	17.7287	21.8163	184.096	160.299	159.437	160.46	93.9228	2.93101	0.194784	15.0475	3.59e-51	2.37e-48	yes
356	AAEL010644-RA	5573651	ribonucleoside-diphosphate reductase large subunit	111.149	99.2613	104.287	70.903	719.069	575.318	786.766	711.259	397.251	2.86427	0.164407	17.4218	5.64e-68	5.48e-65	yes
430	AAEL012508-RB	5576415	muscle M-line assembly protein unc-89	114.126	70.9009	73.0006	79.4737	635.223	559.947	645.044	582.663	345.047	2.84651	0.150632	18.8971	1.21e-79	1.54e-76	yes
294	AAEL008692-RA	5570960	barrier-to-autointegration factor	309.628	340.324	268.017	388.019	2273.86	2167.32	2639.57	2139.47	1315.78	2.8165	0.130293	21.6167	1.25e-103	3.65e-100	yes
357	AAEL010691-RA	5573705	ribonucleoside-diphosphate reductase subunit M2	168.708	270.369	179.373	217.384	1285.94	1555.77	1652.73	1355.38	835.706	2.80518	0.165392	16.9608	1.6e-64	1.31e-61	yes
382	AAEL011254-RA	5574618	aprataxin and PNK-like factor	219.32	222.156	158.516	231.409	1521.98	1220.9	1550.61	1462.35	823.405	2.78828	0.138807	20.0874	9.5e-90	1.29e-86	yes
500	AAEL018118-RA	5567894	transcription termination factor 2	73.4375	62.3928	34.4146	68.5656	372.749	360.123	442.881	468.862	235.428	2.77675	0.212693	13.0552	5.94e-39	2.76e-36	yes
390	AAEL011314-RA	5574682	juvenile hormone epoxide hydrolase 1	524.979	361.122	332.674	418.406	3300.97	2348.48	2688.55	2799.52	1596.84	2.76603	0.168383	16.4271	1.22e-60	9.26e-58	yes
178	AAEL005539-RA	5566660	Fanconi anemia group I protein	70.4603	49.158	26.0717	45.1909	351.788	286.561	311.58	316.368	182.147	2.729	0.239487	11.3952	4.42e-30	1.58e-27	yes
621	AAEL023601-RA	5563642	double-strand break repair protein MRE11	72.4451	70.9009	77.1721	81.032	471.177	463.329	526.247	496.174	282.31	2.69392	0.111059	24.2565	5.64e-130	5.77e-126	yes
468	AAEL014055-RA	5579214	deoxynucleoside kinase	344.362	261.861	201.273	246.213	1936.65	1496.49	1650.64	1618.26	969.469	2.66951	0.166926	15.9921	1.45e-57	1.02e-54	yes
395	AAEL011424-RA	5574772	histone H3.3	20.8404	30.2511	27.1145	22.5955	156.755	164.69	158.395	158.184	92.3533	2.6673	0.18187	14.6659	1.07e-48	6.22e-46	yes
369	AAEL010913-RB	5574080	structural maintenance of chromosomes protein 5	130.004	91.6985	124.101	96.6151	694.462	664.251	692.979	735.157	403.658	2.66318	0.117827	22.6025	4.1e-113	2.79e-109	yes
616	AAEL023255-RA	110680439	ribonucleoside-diphosphate reductase large subunit-like	43.6655	86.0264	49.0147	66.2281	354.522	397.453	348.053	449.516	224.31	2.65509	0.210108	12.6368	1.32e-36	5.52e-34	yes
87	AAEL002581-RA	5575302	structural maintenance of chromosomes protein 6	126.035	83.1904	76.1292	85.707	526.77	528.107	535.626	581.525	317.886	2.55099	0.149	17.1208	1.04e-65	8.85e-63	yes
516	AAEL019404-RA	110678329	X-ray repair cross-complementing protein 6	66.4907	64.2835	101.158	68.5656	570.516	284.365	453.302	442.688	256.421	2.54674	0.247817	10.2767	8.97e-25	2.66e-22	yes
64	AAEL001950-RB	5572989	NEDD8 ultimate buster 1	145.883	137.075	129.315	121.548	874.912	700.483	699.231	752.228	445.084	2.50743	0.118098	21.2317	4.87e-100	1.24e-96	yes
411	AAEL011815-RA	5575412	poly [ADP-ribose] polymerase	256.039	200.413	154.344	186.997	1172.02	1072.68	1167.12	1015.11	653.091	2.47271	0.147079	16.8122	1.99e-63	1.56e-60	yes
439	AAEL012826-RA	5576838	replication protein A 70 kDa DNA-binding subunit	311.613	286.44	230.473	282.833	1494.64	1301.05	1598.54	1479.42	873.127	2.40078	0.111026	21.6235	1.08e-103	3.65e-100	yes
488	AAEL015216-RC	5579466	nucleosomal histone kinase 1	20.8404	0	17.7287	15.5831	54.682	55.9947	100.039	70.5569	41.9281	2.37812	0.735434	3.23362	0.0012223	0.0402011	yes
561	AAEL020323-RA	110681386	DNA repair protein RAD50-like	13.8936	9.45345	12.5144	7.79154	34.6319	63.6802	68.7769	47.7966	32.3173	2.31118	0.386275	5.98325	2.19e-09	2.88e-07	yes
127	AAEL003893-RA	5579175	DNA repair protein complementing XP-C cells homolog	119.088	71.8463	60.4862	93.4985	460.24	406.236	418.914	380.097	251.301	2.26968	0.195858	11.5884	4.72e-31	1.75e-28	yes
576	AAEL021495-RA	23687785	DNA ligase 4	128.019	159.763	109.501	114.536	586.92	564.339	666.927	633.874	370.485	2.26084	0.131477	17.1957	2.86e-66	2.54e-63	yes
52	AAEL001580-RA	5571282	otefin	40.6883	40.6499	51.1004	68.5656	251.537	199.824	286.57	227.603	145.817	2.25494	0.213104	10.5814	3.64e-26	1.14e-23	yes
608	AAEL023096-RA	5574869	Fanconi anemia group D2 protein homolog	55.5743	26.4697	34.4146	29.6079	199.589	155.907	172.984	160.46	104.376	2.24714	0.241119	9.3196	1.17e-20	3.1e-18	yes
347	AAEL010253-RA	5573062	origin recognition complex subunit 6	2.97719	4.72673	3.1286	6.23323	14.5819	24.1546	23.9677	19.3462	12.3895	2.23219	0.524443	4.2563	2.08e-05	0.00151466	yes
660	AAEL026470-RB	110677013	DNA repair protein complementing XP-G cells homolog	109.164	144.638	91.7722	81.8112	518.568	433.684	484.564	480.242	293.055	2.16869	0.174849	12.4032	2.51e-35	1.03e-32	yes
330	AAEL009632-RB	5572214	estradiol 17-beta-dehydrogenase 11	4.96199	8.50811	3.1286	14.8039	45.5684	30.7422	26.0518	40.9685	21.8417	2.15866	0.523949	4.11997	3.79e-05	0.00256382	yes
192	AAEL006080-RA	5567402	DNA repair protein RAD51 homolog 1	36.7187	32.1417	37.5432	59.2157	189.564	172.376	197.994	185.496	113.881	2.1541	0.200707	10.7325	7.16e-27	2.36e-24	yes
477	AAEL014377-RA	110679411	nibrin-like	76.4147	73.7369	81.3436	49.8659	292.549	260.211	386.609	302.712	190.43	2.15088	0.197346	10.899	1.17e-27	3.9e-25	yes
212	AAEL006625-RA	5568190	ribosome maturation protein SBDS	170.692	229.719	241.945	337.374	915.013	1101.23	1273.41	1067.46	667.105	2.15001	0.20632	10.4207	1.99e-25	6.17e-23	yes
443	AAEL012906-RB	5576949	acyl-CoA synthetase family member 4 homolog	12.9012	10.3988	5.21433	6.23323	31.8978	36.2319	39.5988	44.3826	23.3573	2.13534	0.39075	5.46473	4.64e-08	5.35e-06	yes
172	AAEL005245-RB	5566192	DNA repair protein RAD50	78.3995	89.8078	56.3148	71.6822	305.308	275.582	364.726	348.232	198.757	2.12452	0.166374	12.7695	2.43e-37	1.05e-34	yes
557	AAEL020078-RA	110676778	uncharacterized LOC110676778	3.96959	2.83604	2.08573	3.89577	12.7591	12.0773	21.8835	9.10412	8.5764	2.11511	0.631328	3.35026	0.000807354	0.0307215	yes
93	AAEL002782-RB	5576096	DNA repair protein XRCC1	159.776	146.529	144.958	137.91	574.161	607.158	671.095	671.428	389.127	2.10045	0.0998813	21.0295	3.52e-98	6.55e-95	yes
635	AAEL024736-RA	5570160	DNA-dependent protein kinase catalytic subunit	153.822	161.654	128.273	125.444	718.157	566.535	521.037	628.184	375.388	2.09882	0.144556	14.5191	9.17e-48	5.21e-45	yes
517	AAEL019404-RB	110678329	X-ray repair cross-complementing protein 6	53.5895	84.1357	26.0717	51.4242	173.16	306.324	215.709	213.947	140.545	2.0755	0.333788	6.218	5.04e-10	7.3e-08	yes
305	AAEL008960-RA	5571306	regulator of telomere elongation helicase 1 homolog	108.171	77.5183	62.572	99.7317	325.358	350.241	376.189	409.685	226.183	2.06433	0.175007	11.7957	4.11e-32	1.55e-29	yes
268	AAEL008105-RC	5570136	glutamate--cysteine ligase	38.7035	104.933	113.672	62.3323	364.547	353.535	322.001	287.918	205.955	2.0576	0.305782	6.72896	1.71e-11	2.96e-09	yes
15	AAEL000550-RA	5563667	ATPase WRNIP1	120.08	76.573	89.6865	107.523	406.47	388.669	437.671	401.719	253.549	2.05083	0.136692	15.0032	6.99e-51	4.47e-48	yes
244	AAEL007595-RC	5579964	cellular tumor antigen p53	4.96199	7.56276	6.2572	2.33746	19.1387	27.4484	30.2201	9.10412	13.3788	2.0438	0.620049	3.29619	0.000980066	0.0346338	yes
651	AAEL025895-RA	5565134	DNA repair protein RAD50	25.8024	18.9069	20.8573	13.2456	90.2253	87.8348	71.9031	64.8668	49.2053	2.01674	0.275718	7.31452	2.58e-13	5.12e-11	yes
313	AAEL009123-RA	5571541	cytochrome P450 6d3	145.883	161.654	110.544	111.419	516.745	591.787	457.47	538.281	329.223	1.99204	0.154063	12.93	3.05e-38	1.35e-35	yes
240	AAEL007541-RA	5569337	DNA polymerase delta small subunit	47.6351	56.7207	62.572	91.161	243.335	251.427	258.434	279.952	161.405	1.98894	0.195395	10.1791	2.46e-24	7.18e-22	yes
624	AAEL023692-RA	110676855	glutathione S-transferase epsilon 2	100.232	138.966	91.7722	141.027	421.052	440.272	549.173	431.307	289.225	1.95831	0.174092	11.2487	2.35e-29	8.14e-27	yes
257	AAEL007951-RB	110676856	glutathione S-transferase epsilon 2	100.232	138.966	91.7722	141.027	421.052	440.272	549.173	431.307	289.225	1.95831	0.174092	11.2487	2.35e-29	8.14e-27	yes
475	AAEL014348-RD	5564196	caspase	31.7567	25.5243	26.0717	27.2704	92.9594	110.891	114.628	110.387	67.4362	1.95293	0.197769	9.8748	5.35e-23	1.54e-20	yes
267	AAEL008101-RB	5570125	uncharacterized LOC5570125	59.5439	49.158	41.7146	52.2033	194.121	166.886	252.182	168.426	123.029	1.94669	0.203444	9.56872	1.08e-21	2.99e-19	yes
622	AAEL023664-RA	5564682	uncharacterized LOC5564682	19.848	17.0162	13.5573	17.1414	67.4412	71.3658	59.3982	61.4528	40.9026	1.93964	0.252532	7.6808	1.58e-14	3.4e-12	yes
403	AAEL011626-RB	5575088	DNA cross-link repair 1A protein	58.5515	69.9556	50.0576	76.3571	223.285	219.587	258.434	264.019	152.531	1.90875	0.159802	11.9445	6.94e-33	2.68e-30	yes
218	AAEL006886-RB	5568476	growth arrest and DNA damage-inducible protein GADD45 alpha	110.156	97.3706	98.0294	84.9278	362.724	355.731	385.567	353.922	231.054	1.90868	0.10834	17.6175	1.81e-69	1.94e-66	yes
225	AAEL006992-RA	5568652	probable cytochrome P450 28a5	71.4527	73.7369	93.858	77.9154	256.094	271.19	294.907	307.264	180.802	1.83473	0.1313	13.9735	2.26e-44	1.15e-41	yes
380	AAEL011200-RA	5574528	uncharacterized LOC5574528	57.5591	73.7369	67.7863	102.848	246.069	207.51	334.506	269.709	169.966	1.80142	0.226544	7.95173	1.84e-15	4.09e-13	yes
570	AAEL021135-RA	110681316	uncharacterized LOC110681316	23.8176	17.0162	27.1145	24.1538	76.5548	94.4224	68.7769	79.661	51.4397	1.79441	0.239363	7.49661	6.55e-14	1.35e-11	yes
121	AAEL003737-RB	5578867	putative ankyrin repeat protein RF_0381	57.5591	61.4475	71.9578	70.903	245.158	216.293	223.004	216.223	145.318	1.78156	0.132531	13.4426	3.4e-41	1.7e-38	yes
41	AAEL001300-RA	5569797	histone PARylation factor 1-like	117.103	115.332	134.53	147.26	440.19	397.453	491.859	439.274	285.375	1.77827	0.120083	14.8087	1.29e-49	7.74e-47	yes
130	AAEL003935-RA	5563778	neurofilament heavy polypeptide	113.133	144.638	119.93	120.769	433.811	422.705	414.745	436.998	275.841	1.77657	0.0979517	18.1372	1.62e-73	1.95e-70	yes
453	AAEL013205-RA	5577460	DNA excision repair protein haywire	193.518	224.992	215.873	239.2	627.932	610.452	786.766	757.918	457.081	1.66877	0.124211	13.4349	3.77e-41	1.84e-38	yes
139	AAEL004317-RA	5564549	terminal uridylyltransferase Tailor	507.115	545.464	573.576	653.71	1665.98	1877.47	1848.64	1845.86	1189.73	1.66413	0.0928705	17.9189	8.4e-72	9.54e-69	yes
502	AAEL018181-RB	5572204	uncharacterized LOC5572204	51.6047	66.1742	55.2719	82.5904	159.489	209.706	196.952	249.225	133.877	1.66247	0.211952	7.84362	4.38e-15	9.62e-13	yes
122	AAEL003740-RA	5578869	uncharacterized LOC5578869	32.7491	37.8138	41.7146	25.7121	121.212	91.1286	120.881	93.3172	70.566	1.64278	0.225931	7.27115	3.56e-13	6.94e-11	yes
483	AAEL014945-RB	5565705	aprataxin-like protein	31.7567	17.0162	23.9859	95.0568	101.162	114.185	176.11	135.424	86.8371	1.64191	0.522324	3.14346	0.00166962	0.0498393	yes
425	AAEL012265-RA	5576034	RNA polymerase I-specific transcription initiation factor RRN3	141.913	104.933	96.9866	89.6027	321.713	334.87	410.577	281.09	222.711	1.64075	0.18562	8.83929	9.63e-19	2.43e-16	yes
263	AAEL008038-RC	5569944	uncharacterized protein F58A4.6	8.93158	18.9069	16.6859	7.01239	57.4161	34.036	44.8092	21.6223	26.1775	1.63035	0.491054	3.32011	0.000899832	0.032893	yes
51	AAEL001562-RA	5571291	endoribonuclease rege-1	159.776	126.676	111.587	121.548	416.495	378.788	369.936	433.583	264.799	1.62295	0.128156	12.6639	9.38e-37	3.99e-34	yes
124	AAEL003748-RA	5578920	cytochrome P450 9e2	9.92398	17.0162	6.2572	10.9082	27.341	39.5257	28.136	40.9685	22.5096	1.61231	0.404653	3.98443	6.76e-05	0.00412595	yes
440	AAEL012830-RA	5575236	histone chaperone asf1	194.51	166.381	107.415	178.426	552.288	472.112	463.723	468.862	325.465	1.59517	0.176325	9.04674	1.47e-19	3.86e-17	yes
14	AAEL000515-RA	5578484	uncharacterized LOC5578484	117.103	151.255	125.144	128.56	329.004	363.417	522.079	326.61	257.896	1.56116	0.188305	8.29057	1.13e-16	2.68e-14	yes
125	AAEL003864-RA	5579115	uncharacterized LOC5579115	184.586	184.342	180.416	218.942	510.366	494.071	857.627	393.753	378.013	1.55318	0.239927	6.47354	9.57e-11	1.54e-08	yes
233	AAEL007238-RA	5568939	uncharacterized LOC5568939	69.4679	60.5021	44.8432	75.578	188.653	174.572	189.657	177.53	122.6	1.53446	0.163898	9.36232	7.8e-21	2.1e-18	yes
285	AAEL008482-RA	5570677	structure-specific endonuclease subunit SLX4	131.989	76.573	91.7722	134.794	339.94	305.226	303.243	311.816	211.919	1.53048	0.18803	8.13958	3.97e-16	9.11e-14	yes
504	AAEL018267-RB	5578230	probable multidrug resistance-associated protein lethal(2)03659	137.943	34.9778	49.0147	72.4613	119.389	250.329	242.803	229.879	142.1	1.5163	0.432042	3.50961	0.000448768	0.0195525	yes
446	AAEL013002-RB	5577107	cyclin-dependent kinase 9	367.187	336.543	358.746	389.577	1139.21	825.647	1143.15	1025.35	698.177	1.50902	0.124555	12.1153	8.76e-34	3.51e-31	yes
182	AAEL005663-RA	5566804	caltractin	150.845	259.025	245.074	258.679	561.402	681.818	746.125	600.872	437.98	1.50178	0.188272	7.97661	1.5e-15	3.38e-13	yes
655	AAEL026008-RA	110675610	uncharacterized LOC110675610	1290.12	936.837	809.264	1340.15	3090.45	2706.41	3843.17	2471.77	2061.02	1.46825	0.207694	7.06931	1.56e-12	2.92e-10	yes
224	AAEL006984-RB	5568651	probable cytochrome P450 28a5	42.6731	50.1033	85.515	57.6574	173.16	170.18	161.521	142.252	110.383	1.46053	0.219477	6.6546	2.84e-11	4.68e-09	yes
663	AAEL026833-RA	110675611	uncharacterized LOC110675611	895.143	492.525	492.233	716.043	2029.61	1786.34	2009.12	1231.33	1206.54	1.44263	0.24345	5.92575	3.11e-09	4.02e-07	yes
396	AAEL011425-RA	5574782	FACT complex subunit Ssrp1	372.149	349.778	329.546	385.681	937.797	878.348	1039.99	1044.7	667.248	1.43809	0.0914451	15.7262	1e-55	6.81e-53	yes
50	AAEL001511-RA	5571097	uncharacterized LOC5571097	2180.3	1720.53	1330.7	1451.56	6337.65	4068.95	4534.06	3101.09	3090.6	1.43294	0.241977	5.92181	3.18e-09	4.09e-07	yes
152	AAEL004694-RE	5565257	protein unc-13 homolog 4B	54.5819	56.7207	57.3576	95.0568	146.73	241.546	98.997	227.603	122.324	1.43277	0.336661	4.25581	2.08e-05	0.00151466	yes
487	AAEL015216-RB	5579466	nucleosomal histone kinase 1	140.921	81.2997	125.144	109.082	376.395	192.139	358.473	294.746	209.775	1.42285	0.255539	5.56804	2.58e-08	3.06e-06	yes
441	AAEL012830-RB	5575236	histone chaperone asf1	26.7948	33.0871	46.929	51.4242	115.744	106.5	112.544	91.0412	73.0079	1.42251	0.237065	6.00051	1.97e-09	2.61e-07	yes
195	AAEL006226-RA	5567623	deoxynucleoside triphosphate triphosphohydrolase SAMHD1	328.484	298.729	312.86	322.57	838.458	800.395	863.879	883.099	581.059	1.42218	0.0690021	20.6106	2.2e-94	3.75e-91	yes
423	AAEL012226-RA	5575975	protein brambleberry	132.981	157.873	147.044	129.34	397.356	365.612	363.684	386.925	260.102	1.4205	0.0991435	14.3278	1.47e-46	8.11e-44	yes
320	AAEL009271-RB	5571749	uncharacterized LOC5571749	54.5819	51.994	39.6289	20.258	80.2003	129.556	116.712	116.077	76.1262	1.41667	0.329246	4.30278	1.69e-05	0.00125788	yes
664	AAEL026860-RC	110678467	mitochondrial import inner membrane translocase subunit Tim23-like	7.93919	7.56276	7.30006	6.23323	22.7842	17.567	18.7573	15.9322	13.0095	1.38344	0.429221	3.22314	0.00126795	0.0411299	yes
213	AAEL006754-RB	5568315	uncharacterized LOC5568315	44.6579	44.4312	56.3148	45.9701	124.857	121.871	95.8708	150.218	85.5239	1.36653	0.199942	6.83461	8.22e-12	1.47e-09	yes
3	AAEL000126-RA	5567757	molybdenum cofactor biosynthesis protein 1	25.8024	126.676	45.8861	69.3447	185.008	172.376	150.059	182.082	119.654	1.36298	0.421545	3.2333	0.0012237	0.0402011	yes
406	AAEL011665-RA	5575108	uncharacterized LOC5575108	417.8	865.936	698.72	905.377	1517.43	1832.45	1908.04	2084.84	1278.82	1.3456	0.23642	5.69157	1.26e-08	1.56e-06	yes
316	AAEL009131-RA	5571543	cytochrome P450 6d3	1441.95	1419.91	1404.74	1021.47	3196.16	3727.49	3834.83	2609.47	2332	1.3385	0.164498	8.13691	4.05e-16	9.21e-14	yes
120	AAEL003727-RA	5578863	ninjurin-1	14.886	12.2895	7.30006	14.0248	26.4296	32.9381	31.2622	29.5884	21.0898	1.29552	0.350044	3.70103	0.000214727	0.0111364	yes
342	AAEL010108-RB	5572883	protein fem-1 homolog B	11.9088	34.9778	41.7146	24.1538	79.2889	53.7988	85.45	56.9007	48.5242	1.29389	0.393987	3.28408	0.00102316	0.0354359	yes
243	AAEL007595-RB	5579964	cellular tumor antigen p53	148.86	162.599	144.958	190.893	376.395	365.612	439.755	403.995	279.133	1.28593	0.120915	10.635	2.05e-26	6.64e-24	yes
359	AAEL010759-RA	5573833	cell cycle checkpoint control protein RAD9A	51.6047	39.7045	42.7575	40.516	110.275	117.479	107.334	88.7651	74.8045	1.28574	0.183769	6.99652	2.62e-12	4.87e-10	yes
388	AAEL011255-RA	5574612	guanine nucleotide-binding protein-like 3 homolog	629.18	646.616	714.363	694.226	1434.49	1668.86	1694.41	1743.44	1153.2	1.284	0.0860977	14.9133	2.7e-50	1.67e-47	yes
346	AAEL010223-RB	5573048	phosphatidylserine decarboxylase proenzyme, mitochondrial	19.848	20.7976	40.6718	34.2828	88.4026	38.4277	86.4921	67.1428	49.5082	1.28051	0.381447	3.35699	0.000787962	0.0300957	yes
640	AAEL024958-RA	5577497	lachesin	77.4071	72.7916	89.6865	67.0073	158.578	155.907	233.425	192.324	130.891	1.27423	0.187891	6.78174	1.19e-11	2.09e-09	yes
588	AAEL021953-RA	5571977	uncharacterized LOC5571977	160.769	129.512	108.458	133.235	283.435	323.891	339.716	333.438	226.557	1.26468	0.134441	9.40696	5.11e-21	1.39e-18	yes
513	AAEL018336-RA	5564301	RING-box protein 2	254.054	409.335	319.117	414.51	824.787	803.689	922.235	782.954	591.335	1.25284	0.164486	7.61671	2.6e-14	5.54e-12	yes
546	AAEL019857-RA	5564429	uncharacterized LOC5564429	258.024	270.369	265.931	225.955	547.732	606.06	640.875	603.148	427.262	1.23553	0.0920861	13.4172	4.8e-41	2.28e-38	yes
375	AAEL011057-RA	5574281	DNA repair protein complementing XP-A cells homolog	77.4071	68.0649	65.7006	77.9154	143.996	148.221	203.204	184.358	121.108	1.22874	0.1718	7.15216	8.54e-13	1.63e-10	yes
548	AAEL019861-RI	5576549	translation initiation factor IF-2	17.8632	16.0709	25.0288	24.1538	33.7206	39.5257	46.8933	72.8329	34.5111	1.20791	0.358976	3.36487	0.000765786	0.0293585	yes
163	AAEL005071-RB	5565953	GTP-binding protein 2	532.918	494.416	507.876	589.82	1220.32	1295.56	1065	1333.75	879.958	1.20767	0.0998673	12.0927	1.15e-33	4.54e-31	yes
171	AAEL005239-RD	5566157	growth hormone-regulated TBC protein 1-A	47.6351	13.2348	38.586	40.516	81.1117	76.8555	80.2397	80.799	57.3722	1.18851	0.350192	3.39389	0.000689074	0.027026	yes
315	AAEL009130-RA	5571542	probable cytochrome P450 6d4	375.127	301.565	271.145	229.851	601.502	647.782	663.801	756.78	480.944	1.18232	0.159468	7.41416	1.22e-13	2.45e-11	yes
38	AAEL001246-RA	5569622	thymidylate kinase	15.8784	15.1255	15.643	21.8163	41.9229	40.6236	35.4305	38.6925	28.1416	1.18186	0.286953	4.11866	3.81e-05	0.00256994	yes
569	AAEL021090-RA	110681157	uncharacterized LOC110681157	17.8632	40.6499	23.9859	15.5831	47.3911	51.603	61.4823	60.3148	39.8591	1.17479	0.353094	3.32713	0.000877453	0.0321901	yes
367	AAEL010877-RA	5574032	protein lethal(2)denticleless	45.6503	34.9778	36.5003	41.2952	95.6935	75.7575	84.408	97.8692	64.019	1.15837	0.194086	5.96833	2.4e-09	3.14e-07	yes
491	AAEL017003-RC	23687423	serine protease easter	61.5287	65.2288	81.3436	69.3447	124.857	160.299	169.858	158.184	111.33	1.14289	0.165338	6.91243	4.76e-12	8.61e-10	yes
434	AAEL012546-RA	5580252	DNA replication licensing factor Mcm6	17.8632	32.1417	12.5144	21.8163	48.3025	42.8195	48.9775	46.6586	33.8867	1.13991	0.320921	3.552	0.000382321	0.0173223	yes
350	AAEL010317-RA	5573219	probable ATP-dependent RNA helicase DDX27	206.419	216.484	224.216	200.243	470.265	438.076	477.27	462.034	336.876	1.12873	0.0806919	13.9882	1.84e-44	9.64e-42	yes
579	AAEL021548-RA	5573487	nuclear pore complex protein Nup205	162.753	103.988	126.187	107.523	285.258	247.035	261.561	278.814	196.64	1.10483	0.158424	6.97388	3.08e-12	5.68e-10	yes
45	AAEL001378-RB	5570348	spermine synthase	51.6047	89.8078	73.0006	67.0073	147.641	152.613	221.962	81.937	110.697	1.10316	0.319852	3.44896	0.000562753	0.0232779	yes
505	AAEL018273-RB	5564200	glycerophosphocholine phosphodiesterase GPCPD1	70.4603	98.3159	131.401	95.836	111.187	206.412	225.088	308.402	155.888	1.10279	0.323569	3.40822	0.000653886	0.0261991	yes
217	AAEL006883-RA	5568477	growth arrest and DNA damage-inducible protein GADD45 alpha	144.89	160.709	164.773	251.667	312.599	327.185	513.742	385.787	282.669	1.08868	0.232428	4.68392	2.81e-06	0.000251133	yes
508	AAEL018288-RAV	5576237	dystonin	32.7491	36.8685	70.9149	42.8535	90.2253	124.067	96.9129	72.8329	70.928	1.07057	0.301941	3.54564	0.00039166	0.0175467	yes
391	AAEL011315-RA	5574673	uncharacterized LOC5574673	235.198	376.247	352.489	378.669	677.146	718.05	776.345	649.806	520.494	1.07006	0.159674	6.70154	2.06e-11	3.48e-09	yes
188	AAEL005898-RB	5567166	tRNA-dihydrouridine(20a/20b) synthase [NAD(P)+]-like	36.7187	52.9393	36.5003	51.4242	95.6935	75.7575	97.9549	104.697	68.9607	1.06643	0.212603	5.01609	5.27e-07	5.39e-05	yes
157	AAEL004854-RA	5565550	DAZ-associated protein 2	51.6047	46.3219	46.929	36.6202	84.7571	99.9121	104.207	88.7651	69.8897	1.06494	0.187011	5.69453	1.24e-08	1.54e-06	yes
345	AAEL010151-RB	5572936	probable cytochrome P450 6a14	336.423	257.134	285.745	321.791	552.288	603.864	671.095	678.257	463.325	1.05879	0.117526	9.00896	2.08e-19	5.38e-17	yes
596	AAEL022346-RA	5575295	glutathione S-transferase 1	24.81	54.83	47.9718	58.4366	82.023	95.5204	131.301	79.661	71.8193	1.05717	0.310576	3.40391	0.000664285	0.0264601	yes
282	AAEL008376-RB	5570563	uncharacterized LOC5570563	38.7035	47.2673	54.229	33.5036	94.7822	121.871	73.9872	67.1428	66.4358	1.04944	0.274223	3.82696	0.000129734	0.00723094	yes
456	AAEL013402-RD	5577889	E3 ubiquitin-protein ligase Mdm2	106.187	70.9009	77.1721	78.6946	170.426	167.984	175.068	174.116	127.569	1.04898	0.148043	7.08563	1.38e-12	2.62e-10	yes
627	AAEL024141-RG	5564524	paired amphipathic helix protein Sin3a	392.99	339.379	422.361	360.748	718.157	730.127	788.85	894.479	580.886	1.04792	0.108274	9.67839	3.73e-22	1.04e-19	yes
349	AAEL010290-RC	5573100	short-chain dehydrogenase/reductase family 16C member 6	59.5439	72.7916	85.515	105.186	172.248	130.654	152.143	215.085	124.146	1.04757	0.234149	4.47392	7.68e-06	0.000617838	yes
595	AAEL022334-RA	110675612	uncharacterized LOC110675612	5227.95	5684.36	4974.47	7130.04	10107.1	11274.7	12623.7	13056.4	8759.84	1.03164	0.141986	7.2658	3.71e-13	7.15e-11	yes
81	AAEL002386-RA	5574495	uncharacterized protein KIAA2013 homolog	500.169	399.881	384.818	485.413	822.053	837.725	951.413	976.416	669.736	1.0172	0.117845	8.63167	6.05e-18	1.49e-15	yes
573	AAEL021206-RA	5576585	non-homologous end-joining factor 1	49.6199	51.0487	55.2719	81.8112	121.212	124.067	131.301	106.973	90.1631	1.01404	0.205287	4.93959	7.83e-07	7.84e-05	yes
679	AAEL027779-RA	110675366	uncharacterized LOC110675366	126.035	113.441	123.058	128.56	287.992	225.077	254.266	216.223	184.332	1.00471	0.131967	7.61332	2.67e-14	5.63e-12	yes
67	AAEL002084-RB	5573412	sin3 histone deacetylase corepressor complex component SDS3	358.256	335.598	262.802	304.649	678.057	554.457	664.843	632.736	473.925	1.0047	0.119034	8.44046	3.16e-17	7.69e-15	yes
296	AAEL008719-RA	5570989	probable small nuclear ribonucleoprotein G	146.875	308.183	321.203	415.289	457.506	568.73	757.588	591.767	445.893	0.9941	0.298286	3.33271	0.000860055	0.0318031	yes
54	AAEL001623-RA	5571500	proteasome activator complex subunit 3	914.991	913.204	918.765	1019.91	1822.73	1876.37	1932	1877.72	1409.46	0.992848	0.0564316	17.5938	2.75e-69	2.81e-66	yes
472	AAEL014204-RA	5563882	6-phosphogluconolactonase	219.32	339.379	322.246	385.681	542.263	620.333	712.778	629.322	471.415	0.981509	0.178518	5.4981	3.84e-08	4.48e-06	yes
189	AAEL005957-RB	5567302	phospholipase B1, membrane-associated	18.8556	19.8523	25.0288	23.3746	44.657	49.4071	50.0195	27.3123	32.3134	0.978735	0.306951	3.18857	0.00142981	0.0449162	yes
656	AAEL026031-RA	5570565	ATP-binding cassette sub-family A member 3	60.5363	46.3219	34.4146	37.3994	109.364	81.2472	86.4921	71.6949	65.9338	0.972023	0.250707	3.87712	0.000105701	0.0060671	yes
397	AAEL011427-RB	5574779	zinc finger protein 879	33.7415	46.3219	38.586	34.2828	77.4662	60.3864	75.0293	86.4891	56.5379	0.971824	0.215727	4.50488	6.64e-06	0.000540659	yes
185	AAEL005787-RA	5567041	serine protease easter	26.7948	59.5568	44.8432	60.774	88.4026	124.067	82.3238	81.937	71.0874	0.965999	0.298725	3.23374	0.00122182	0.0402011	yes
251	AAEL007765-RB	5569575	serine protease inhibitor 42Dd	271.917	256.189	237.773	256.342	559.579	433.684	578.351	389.201	372.88	0.941064	0.149724	6.28533	3.27e-10	4.88e-08	yes
203	AAEL006488-RB	5568050	nuclear pore complex protein Nup88	229.244	213.648	242.988	236.084	422.874	422.705	423.082	501.864	336.561	0.939823	0.0958724	9.80285	1.09e-22	3.11e-20	yes
448	AAEL013072-RA	5580326	tudor and KH domain-containing protein homolog	545.819	502.924	520.39	546.966	1118.25	957.4	938.908	998.039	766.087	0.923648	0.0797549	11.5811	5.14e-31	1.88e-28	yes
467	AAEL014051-RA	5579213	nucleolar protein 14 homolog	113.133	86.9718	63.6148	107.523	194.121	152.613	160.479	195.738	134.274	0.917276	0.203389	4.50997	6.48e-06	0.00053208	yes
554	AAEL019944-RA	5575630	squamous cell carcinoma antigen recognized by T-cells 3	277.871	294.002	346.232	305.428	529.504	527.009	593.982	660.048	441.76	0.91689	0.112136	8.17661	2.92e-16	6.86e-14	yes
451	AAEL013142-RB	5577288	polynucleotide 5'-hydroxyl-kinase NOL9	112.141	57.6661	46.929	63.8906	138.528	114.185	121.923	154.77	101.254	0.916371	0.284188	3.22453	0.0012618	0.0411221	yes
194	AAEL006158-RA	5567559	histone H3.3	4144.25	4448.8	4212.14	4329.76	8621.53	7629.55	8063.57	7987.72	6179.67	0.914765	0.0531852	17.1996	2.67e-66	2.48e-63	yes
59	AAEL001856-RA	5572668	adenosine kinase	704.603	932.111	717.492	893.69	1565.73	1373.52	1623.55	1555.67	1170.79	0.912681	0.118524	7.7004	1.36e-14	2.95e-12	yes
585	AAEL021795-RA	110675609	uncharacterized LOC110675609	4828.02	5538.78	6334.37	7702.72	9437.21	12287	11899.4	12122.1	8768.71	0.906373	0.1635	5.54356	2.96e-08	3.5e-06	yes
2	AAEL000109-RA	5567790	enolase-phosphatase E1-like	92.293	125.731	148.087	85.707	203.235	230.566	193.826	216.223	161.958	0.906032	0.192094	4.7166	2.4e-06	0.000221742	yes
44	AAEL001378-RA	5570348	spermine synthase	244.13	154.091	220.045	201.801	364.547	364.515	398.072	405.133	294.042	0.902972	0.143243	6.30377	2.9e-10	4.43e-08	yes
355	AAEL010576-RBD	5573536	modifier of mdg4	28.7795	36.8685	49.0147	37.3994	56.5048	97.7162	65.6506	61.4528	54.1733	0.887153	0.276971	3.20306	0.00135977	0.0432123	yes
496	AAEL017367-RB	23687787	glutamic acid-rich protein	59.5439	35.9231	34.4146	39.7369	56.5048	84.541	80.2397	92.1792	60.3854	0.883198	0.267497	3.30171	0.000960975	0.0340913	yes
177	AAEL005469-RB	5566550	zinc finger CCCH domain-containing protein 18	332.453	292.112	286.788	303.87	655.273	485.287	519.995	578.111	431.736	0.882708	0.117506	7.51203	5.82e-14	1.21e-11	yes
176	AAEL005445-RA	5566519	uncharacterized LOC5566519	82.3691	77.5183	75.0864	77.1363	137.616	122.969	154.227	160.46	110.923	0.881189	0.144506	6.09794	1.07e-09	1.48e-07	yes
498	AAEL017566-RB	23687986	DNA ligase 1	171.685	112.496	92.8151	106.744	209.614	188.845	229.256	254.915	170.796	0.868218	0.211154	4.11177	3.93e-05	0.00262796	yes
39	AAEL001255-RC	5569621	proline-rich protein 2	86.3386	52.9393	88.6436	63.8906	154.021	103.206	141.722	128.596	102.42	0.861466	0.222767	3.86713	0.000110126	0.00628577	yes
647	AAEL025525-RA	5579907	elongation factor-like GTPase 1	102.217	73.7369	64.6577	72.4613	148.553	139.438	138.596	138.838	109.812	0.855619	0.16528	5.17679	2.26e-07	2.43e-05	yes
400	AAEL011562-RA	5574962	caspase Dronc	242.145	196.632	166.859	247.771	415.583	359.025	365.768	401.719	299.438	0.850612	0.142719	5.96005	2.52e-09	3.28e-07	yes
252	AAEL007913-RA	5569761	sulfotransferase family cytosolic 1B member 1	31.7567	36.8685	53.1862	42.0743	54.682	83.4431	77.1135	80.799	57.4904	0.850293	0.247611	3.43399	0.000594773	0.0243072	yes
314	AAEL009129-RB	5571544	probable cytochrome P450 6d4	881.25	901.86	952.137	941.218	1593.07	1645.8	1665.23	1728.64	1288.65	0.850103	0.0521951	16.287	1.22e-59	8.9e-57	yes
361	AAEL010793-RA	5573867	F-box/LRR-repeat protein 7	165.731	123.84	116.801	122.327	286.169	186.649	233.425	236.707	183.956	0.837966	0.178453	4.69572	2.66e-06	0.000240206	yes
249	AAEL007729-RA	5579981	uncharacterized LOC5579981	277.871	255.243	234.645	269.587	499.429	421.607	433.503	500.726	361.577	0.837724	0.100241	8.35707	6.43e-17	1.55e-14	yes
639	AAEL024939-RA	110677082	uncharacterized LOC110677082	40.6883	48.2126	52.1433	54.5408	82.9344	93.3245	80.2397	92.1792	68.0328	0.826768	0.177889	4.64766	3.36e-06	0.000291922	yes
145	AAEL004482-RA	5564891	RRP15-like protein	52.5971	51.994	51.1004	61.5532	107.541	99.9121	78.1555	100.145	75.3749	0.823791	0.179955	4.57775	4.7e-06	0.000395233	yes
47	AAEL001421-RC	5570534	vigilin	2762.84	2493.82	2275.53	1821.66	4002.72	4429.07	4035.95	4083.2	3238.1	0.823645	0.130478	6.31251	2.75e-10	4.25e-08	yes
9	AAEL000407-RA	5577364	protein kish	30.7643	50.1033	37.5432	64.6698	82.9344	83.4431	86.4921	72.8329	63.5979	0.820007	0.25905	3.16544	0.00154848	0.0473196	yes
678	AAEL027606-RC	5566691	uncharacterized LOC5566691	113.133	100.207	111.587	146.481	138.528	199.824	252.182	232.155	161.762	0.798292	0.22228	3.59138	0.00032893	0.015416	yes
594	AAEL022286-RA	110676045	40S ribosomal protein S27	6636.17	8959.04	7343.86	9515.03	13541.1	14409.3	15158	13290.9	11106.7	0.797146	0.129234	6.16822	6.91e-10	9.6e-08	yes
29	AAEL001037-RA	5579906	pre-rRNA processing protein FTSJ3	277.871	250.517	193.973	250.109	455.684	367.808	418.914	439.274	331.769	0.789407	0.129711	6.08588	1.16e-09	1.59e-07	yes
370	AAEL011006-RF	5574237	guanylate kinase	160.769	140.856	98.0294	102.069	241.512	214.097	223.004	183.22	170.445	0.783904	0.192535	4.07149	4.67e-05	0.00304969	yes
524	AAEL019569-RA	5575087	uncharacterized LOC5575087	44.6579	30.2511	33.3717	45.1909	55.5934	60.3864	78.1555	67.1428	51.8437	0.759676	0.236507	3.21207	0.00131782	0.0423403	yes
455	AAEL013334-RD	5577697	serine/threonine-protein phosphatase 4 regulatory subunit 3	144.89	237.282	222.131	164.402	395.533	308.52	350.137	242.397	258.161	0.756806	0.214882	3.52196	0.000428361	0.0189462	yes
327	AAEL009586-RB	5572175	uncharacterized LOC5572175	119.088	146.529	158.516	162.843	236.044	245.937	266.771	244.673	197.55	0.755278	0.121858	6.19803	5.72e-10	8.17e-08	yes
158	AAEL004868-RA	5565617	adipocyte plasma membrane-associated protein	182.601	248.626	225.259	302.312	354.522	404.04	429.334	431.307	322.25	0.751627	0.162319	4.63055	3.65e-06	0.000314444	yes
549	AAEL019896-RA	5564539	midasin	477.344	350.723	349.36	311.662	633.4	590.689	628.37	647.53	498.635	0.749352	0.137865	5.43542	5.47e-08	6.24e-06	yes
58	AAEL001787-RE	5572270	deoxyribodipyrimidine photo-lyase	193.518	190.96	193.973	174.531	315.333	375.494	378.273	194.6	252.085	0.748402	0.210884	3.54888	0.000386878	0.0173921	yes
78	AAEL002249-RA	5574113	uncharacterized LOC5574113	40.6883	34.9778	42.7575	50.645	61.973	83.4431	75.0293	62.5908	56.5131	0.735067	0.216048	3.40234	0.00066812	0.026561	yes
537	AAEL019796-RA	5569631	uncharacterized LOC5569631	57.5591	68.0649	57.3576	44.4118	88.4026	96.6183	96.9129	93.3172	75.3305	0.729169	0.17956	4.06086	4.89e-05	0.00313188	yes
409	AAEL011752-RA	110678069	glutathione S-transferase 1	339.4	407.444	365.003	521.254	725.448	666.447	672.138	647.53	543.083	0.729019	0.141991	5.13427	2.83e-07	3e-05	yes
657	AAEL026160-RB	5575323	uncharacterized LOC5575323	150.845	262.806	302.431	298.416	388.242	379.886	443.923	464.31	336.357	0.72335	0.217111	3.33171	0.000863133	0.0318031	yes
238	AAEL007382-RB	5569119	serine-threonine kinase receptor-associated protein	91.3006	121.004	123.058	151.156	176.805	247.035	230.298	150.218	161.359	0.721954	0.220419	3.27538	0.00105521	0.0360572	yes
46	AAEL001416-RA	5570540	inner nuclear membrane protein Man1	210.388	122.895	166.859	154.273	233.31	228.371	268.855	344.818	216.221	0.716641	0.206156	3.47621	0.00050856	0.0214266	yes
266	AAEL008068-RB	5569987	integrator complex subunit 3 homolog	279.856	219.32	273.231	219.721	483.936	384.277	341.8	411.961	326.763	0.712733	0.147307	4.83841	1.31e-06	0.000124975	yes
248	AAEL007701-RB	5569519	putative E3 ubiquitin-protein ligase UBR7	305.659	205.14	229.431	285.17	448.393	409.53	407.451	413.099	337.984	0.710029	0.138152	5.13948	2.76e-07	2.93e-05	yes
414	AAEL011830-RD	5575432	probable methylthioribulose-1-phosphate dehydratase	443.602	706.173	748.778	807.983	1049.89	1081.47	1201.51	1086.8	890.776	0.706807	0.180645	3.9127	9.13e-05	0.00532869	yes
399	AAEL011505-RB	5574897	nuclear pore membrane glycoprotein 210	240.16	175.834	176.244	155.052	347.231	289.855	311.58	261.743	244.712	0.700087	0.164173	4.26433	2.01e-05	0.00146851	yes
337	AAEL009908-RA	5572590	glutamyl-tRNA(Gln) amidotransferase subunit B, mitochondrial	150.845	191.905	168.944	171.414	266.119	270.092	307.412	262.881	223.702	0.694734	0.11019	6.30487	2.88e-10	4.43e-08	yes
490	AAEL015404-RB	5579458	lysozyme c-1	680.785	344.106	408.804	466.713	662.564	844.312	826.364	741.985	621.954	0.694331	0.211245	3.28685	0.00101314	0.0352683	yes
471	AAEL014169-RA	5563838	U6 snRNA-associated Sm-like protein LSm5	40.6883	67.1195	47.9718	63.1115	101.162	90.0307	89.6183	73.9709	71.7091	0.693096	0.218326	3.17459	0.0015005	0.0465268	yes
466	AAEL013902-RC	5578898	programmed cell death protein 2	51.6047	71.8463	73.0006	78.6946	124.857	109.794	97.9549	112.663	90.0519	0.691334	0.178896	3.86445	0.000111342	0.00633749	yes
42	AAEL001324-RB	5570075	replication factor C subunit 1	231.229	153.146	225.259	188.555	303.485	292.051	333.464	351.646	259.854	0.683828	0.149417	4.57665	4.72e-06	0.000395682	yes
304	AAEL008942-RA	5571317	probable rRNA-processing protein EBP2 homolog	106.187	89.8078	69.872	85.707	160.401	118.577	133.385	151.356	114.412	0.682341	0.17509	3.89709	9.74e-05	0.00561964	yes
449	AAEL013075-RB	5577193	46 kDa FK506-binding nuclear protein	727.428	517.104	619.463	551.641	1000.68	929.951	989.97	944.552	785.099	0.679629	0.114792	5.92051	3.21e-09	4.1e-07	yes
234	AAEL007246-RA	5568938	uncharacterized LOC5568938	188.556	146.529	138.701	165.96	259.74	222.881	285.528	256.053	207.993	0.678375	0.134644	5.0383	4.7e-07	4.85e-05	yes
1	AAEL000076-RB	5563560	probable dimethyladenosine transferase	62.5211	85.0811	57.3576	75.578	103.896	115.283	111.502	120.63	91.481	0.677419	0.169047	4.00728	6.14e-05	0.00379182	yes
43	AAEL001351-RA	5570094	uncharacterized LOC5570094	1296.07	1677.04	1550.74	1622.98	2506.26	2216.73	2446.79	2601.5	1989.76	0.668354	0.0995972	6.71057	1.94e-11	3.3e-09	yes
169	AAEL005190-RA	5566137	39S ribosomal protein L42, mitochondrial	175.654	281.713	281.574	345.944	396.445	413.922	527.289	385.787	351.041	0.66598	0.211735	3.14535	0.00165886	0.0496297	yes
17	AAEL000677-RA	5565447	DNA-directed RNA polymerases I, II, and III subunit RPABC3	59.5439	81.2997	60.4862	100.511	121.212	116.381	128.175	114.939	97.8185	0.662016	0.202419	3.27052	0.00107349	0.036438	yes
241	AAEL007558-RA	5569380	SWI/SNF-related matrix-associated actin-dependent regulator of chromatin subfamily A containing DEAD/H box 1 homolog	408.868	328.98	369.175	361.528	628.843	523.715	543.962	623.632	473.588	0.661209	0.103244	6.40432	1.51e-10	2.37e-08	yes
168	AAEL005163-RA	5566095	60S ribosome subunit biogenesis protein NIP7 homolog	53.5895	70.9009	57.3576	70.1239	101.162	75.7575	109.418	110.387	81.087	0.650229	0.194804	3.33786	0.000844274	0.031713	yes
568	AAEL020929-RA	110675521	replication factor C subunit 2	41.6807	56.7207	54.229	56.0991	73.8207	87.8348	87.5342	79.661	67.1975	0.649708	0.181823	3.57329	0.000352518	0.0162972	yes
131	AAEL003944-RA	5563791	nucleolar protein 16	49.6199	72.7916	56.3148	80.2529	104.807	104.304	106.292	92.1792	83.3201	0.645986	0.193306	3.34178	0.00083242	0.0313832	yes
269	AAEL008105-RE	5570136	glutamate--cysteine ligase	712.542	560.59	657.006	670.852	981.542	1084.76	999.349	990.073	832.089	0.64061	0.0880236	7.2777	3.4e-13	6.67e-11	yes
214	AAEL006786-RF	5579951	ras-like GTP-binding protein RhoL	128.019	141.802	146.001	102.848	182.273	196.53	193.826	231.017	165.29	0.635378	0.150209	4.22996	2.34e-05	0.00168171	yes
674	AAEL027396-RA	110681378	nucleolar protein 14 homolog	65.4983	51.0487	66.7434	59.2157	80.2003	98.8142	115.67	79.661	77.1065	0.627975	0.198585	3.16224	0.00156558	0.047535	yes
339	AAEL009961-RA	5572697	complex III assembly factor LYRM7	58.5515	74.6823	66.7434	77.9154	104.807	116.381	126.091	83.0751	88.5309	0.627765	0.189369	3.31503	0.000916322	0.0331037	yes
583	AAEL021771-RA	5563776	eukaryotic translation initiation factor 2-alpha kinase	504.138	355.45	370.218	344.386	660.741	573.122	624.202	569.007	500.158	0.626632	0.140372	4.46408	8.04e-06	0.000641862	yes
283	AAEL008403-RA	5570592	26S proteasome non-ATPase regulatory subunit 10	74.4299	80.3544	87.6008	103.628	115.744	129.556	164.648	126.32	110.285	0.625952	0.178889	3.49911	0.000466819	0.020167	yes
204	AAEL006491-RA	5568063	GATOR complex protein WDR24	40.6883	58.6114	66.7434	59.9949	95.6935	82.3451	91.7025	78.523	71.7878	0.625523	0.196894	3.17695	0.00148834	0.0462994	yes
136	AAEL004068-RA	5564063	retinitis pigmentosa 1-like 1 protein	232.221	183.397	206.488	172.193	339.029	286.561	277.192	317.506	251.823	0.624415	0.128633	4.85425	1.21e-06	0.000116477	yes
445	AAEL012962-RA	5577045	probable ATP-dependent RNA helicase DDX52	76.4147	95.4799	88.6436	95.836	127.591	126.263	135.47	159.322	113.127	0.616041	0.147534	4.17558	2.97e-05	0.00208711	yes
201	AAEL006457-RA	5568009	asparagine synthetase domain-containing protein CG17486	65.4983	70.9009	73.0006	79.4737	100.25	107.598	125.049	111.525	91.662	0.615135	0.15237	4.03712	5.41e-05	0.00341274	yes
331	AAEL009636-RD	5580009	exportin-7	430.701	377.193	381.689	282.054	577.807	612.648	532.5	508.692	462.91	0.603522	0.141419	4.26761	1.98e-05	0.0014523	yes
424	AAEL012261-RA	5576033	probable cytosolic Fe-S cluster assembly factor AAEL012261	167.715	209.867	187.716	244.654	329.004	306.324	308.454	290.194	255.491	0.603236	0.13126	4.59573	4.31e-06	0.000365632	yes
220	AAEL006908-RB	5568486	PITH domain-containing protein GA19395	85.3462	82.2451	70.9149	85.707	119.389	132.85	141.722	96.7312	101.863	0.596189	0.167792	3.55313	0.000380672	0.0172859	yes
343	AAEL010118-RA	5572907	kelch domain-containing protein 4	104.202	86.0264	92.8151	87.2653	135.794	143.83	137.554	139.976	115.933	0.592053	0.128475	4.60833	4.06e-06	0.000348188	yes
106	AAEL003123-RC	5577135	uncharacterized LOC5577135	1549.13	1521.06	1364.07	1358.85	1527.45	2584.54	2295.69	2326.1	1815.86	0.591984	0.163305	3.62503	0.000288932	0.0139575	yes
509	AAEL018293-RE	5575159	cysteine/serine-rich nuclear protein 1	273.902	173.944	189.802	217.384	315.333	391.963	287.612	293.608	267.943	0.591385	0.17569	3.36607	0.000762483	0.0292868	yes
60	AAEL001879-RA	5572818	uncharacterized LOC5572818	96.2626	90.7532	119.93	81.032	156.755	148.221	132.343	143.39	121.086	0.590832	0.155641	3.79611	0.000146983	0.00805213	yes
232	AAEL007230-RA	5568934	mediator of RNA polymerase II transcription subunit 30	77.4071	69.0102	65.7006	70.903	99.339	105.402	122.965	97.8692	88.5745	0.587753	0.155052	3.79068	0.000150233	0.0082082	yes
643	AAEL025170-RA	110681235	S-adenosylmethionine decarboxylase proenzyme-like	465.435	482.126	630.934	432.431	802.003	705.972	659.633	829.612	626.018	0.577434	0.143187	4.03273	5.51e-05	0.00345579	yes
332	AAEL009645-RD	5580019	uncharacterized LOC5580019	2908.72	2888.03	2890.83	3599.69	4399.17	4628.9	4461.12	4794.45	3821.36	0.572743	0.0909553	6.29697	3.04e-10	4.56e-08	yes
179	AAEL005556-RA	5566716	putative uncharacterized zinc finger protein 814	174.662	128.567	173.116	134.015	275.233	184.453	204.246	240.121	189.302	0.571573	0.178692	3.19865	0.00138073	0.0436747	yes
97	AAEL002886-RA	5576472	thioredoxin reductase 1, mitochondrial	499.176	467.001	373.346	391.915	795.623	523.715	697.147	546.247	536.771	0.567136	0.170921	3.31812	0.000906268	0.0330101	yes
69	AAEL002108-RA	5573604	ribosomal RNA small subunit methyltransferase NEP1	88.3234	99.2613	99.0723	123.106	138.528	142.732	172.984	152.494	127.063	0.558585	0.152936	3.65242	0.000259784	0.0127607	yes
604	AAEL022687-RA	5565042	N-acetylneuraminate 9-O-acetyltransferase	105.194	90.7532	102.201	118.431	164.046	169.082	131.301	150.218	128.903	0.55773	0.145185	3.8415	0.000122284	0.00690265	yes
116	AAEL003651-RA	5578775	phospholipase D3	81.3767	101.152	111.587	119.211	154.021	150.417	138.596	165.012	127.671	0.5518	0.150988	3.6546	0.000257587	0.0126832	yes
336	AAEL009859-RA	5572534	nucleolar GTP-binding protein 1	1757.54	2082.6	1872.99	1961.13	2537.25	2872.2	2858.41	2958.84	2362.62	0.548109	0.0788522	6.95109	3.62e-12	6.61e-10	yes
16	AAEL000562-RA	5563671	ragulator complex protein LAMTOR1	142.905	167.326	143.916	153.493	191.387	227.273	219.878	250.363	187.068	0.543485	0.122167	4.44871	8.64e-06	0.000681575	yes
26	AAEL000964-RA	5567455	DNA-binding protein RFXANK	70.4603	77.5183	68.8292	71.6822	90.2253	111.989	104.207	114.939	88.7314	0.540525	0.153668	3.51749	0.000435644	0.019144	yes
140	AAEL004332-RC	5564592	WD repeat-containing protein 19	74.4299	89.8078	76.1292	67.7864	123.946	114.185	113.586	93.3172	94.1485	0.537383	0.163892	3.27888	0.00104218	0.0358518	yes
126	AAEL003868-RA	5579179	DNA repair protein complementing XP-C cells homolog	127.027	99.2613	105.329	88.0444	152.198	136.144	151.101	167.288	128.299	0.537189	0.15162	3.543	0.000395603	0.0176501	yes
565	AAEL020654-RA	5576932	folylpolyglutamate synthase, mitochondrial	347.339	360.177	313.903	343.607	410.115	502.854	518.953	542.833	417.473	0.529855	0.109196	4.85233	1.22e-06	0.000117058	yes
368	AAEL010898-RA	5574050	transmembrane protein 235	287.795	262.806	330.589	257.9	405.558	397.453	350.137	485.932	347.271	0.52641	0.133811	3.93398	8.35e-05	0.00494854	yes
99	AAEL002995-RB	5580264	nicotinamidase	269.932	261.861	313.903	292.962	422.874	368.906	412.661	434.722	347.228	0.526364	0.0944009	5.57584	2.46e-08	2.96e-06	yes
55	AAEL001651-RC	5571655	uncharacterized LOC5571655	64.5059	80.3544	71.9578	73.2405	108.453	104.304	94.8287	110.387	88.5039	0.525476	0.149632	3.51178	0.000445113	0.0194763	yes
10	AAEL000419-RB	5577372	larval cuticle protein A2B	159.776	176.78	147.044	181.543	222.374	258.015	223.004	257.191	203.216	0.523043	0.115487	4.52903	5.93e-06	0.000490205	yes
299	AAEL008806-RA	5571076	KAT8 regulatory NSL complex subunit 3	599.409	419.733	516.219	473.726	805.648	699.385	658.591	713.535	610.781	0.519676	0.127068	4.08976	4.32e-05	0.00285555	yes
437	AAEL012726-RA	5576697	uncharacterized LOC5576697	113.133	125.731	108.458	148.818	173.16	185.551	182.363	174.116	151.416	0.518782	0.132861	3.90471	9.43e-05	0.00547637	yes
482	AAEL014733-RA	5565120	nuclear pore complex protein Nup214	283.826	236.336	247.159	280.496	392.799	384.277	362.642	361.889	318.678	0.517901	0.0918441	5.63892	1.71e-08	2.08e-06	yes
146	AAEL004500-RC	5564921	elongation factor 2	1880.59	1747	1612.27	1824.78	2451.58	2531.84	2419.7	2715.3	2147.88	0.517473	0.0695683	7.43835	1.02e-13	2.06e-11	yes
23	AAEL000924-RA	5567177	eIF-2-alpha kinase GCN2	154.814	122.895	114.715	140.248	169.514	184.453	186.531	224.189	162.17	0.516904	0.146167	3.5364	0.000405627	0.0180579	yes
57	AAEL001715-RB	5572071	T-complex protein 1 subunit epsilon	267.948	224.047	281.574	229.851	301.662	363.417	432.461	336.852	304.726	0.516762	0.143205	3.60855	0.000307913	0.0146664	yes
675	AAEL027465-RA	5575496	FACT complex subunit spt16	540.857	509.541	473.461	435.547	686.259	682.916	708.61	714.673	593.983	0.513159	0.0821032	6.25017	4.1e-10	6.03e-08	yes
278	AAEL008220-RA	5570258	ribosomal L1 domain-containing protein CG13096	122.065	109.66	118.887	120.769	155.844	174.572	166.732	175.254	142.973	0.508979	0.114528	4.44413	8.82e-06	0.000693566	yes
649	AAEL025680-RA	110681150	enolase-phosphatase E1	1133.32	968.034	1006.37	981.734	1416.26	1336.19	1579.78	1421.38	1230.38	0.493242	0.0816506	6.04088	1.53e-09	2.06e-07	yes
170	AAEL005203-RA	5566125	UPF0553 protein C9orf64	182.601	212.703	197.102	204.918	279.79	254.721	307.412	278.814	239.757	0.49018	0.0999692	4.90331	9.42e-07	9.26e-05	yes
117	AAEL003661-RA	5578734	eukaryotic translation initiation factor 6	384.058	401.772	372.303	465.934	546.82	590.689	611.697	536.005	488.66	0.489179	0.0972509	5.03007	4.9e-07	5.03e-05	yes
72	AAEL002157-RB	5580052	ribonuclease P protein subunit p40	261.993	249.571	273.231	282.054	401.002	331.576	369.936	393.753	320.39	0.488003	0.0937732	5.20408	1.95e-07	2.12e-05	yes
659	AAEL026227-RA	5576059	uncharacterized LOC5576059	278.864	278.877	263.845	297.637	348.142	388.669	402.24	431.307	336.198	0.483483	0.0944239	5.12035	3.05e-07	3.2e-05	yes
288	AAEL008551-RA	5570754	transcription factor grauzone	146.875	128.567	113.672	142.585	175.894	162.494	220.92	185.496	159.563	0.483457	0.145061	3.33279	0.00085979	0.0318031	yes
28	AAEL001007-RA	5567843	nuclear RNA export factor 1	461.465	491.58	498.49	577.353	730.916	658.761	685.684	760.194	608.055	0.480583	0.0937333	5.12713	2.94e-07	3.1e-05	yes
112	AAEL003415-RB	5578090	lamin Dm0	1136.3	850.811	824.907	743.313	1377.99	1138.56	1197.34	1241.57	1063.85	0.479995	0.144132	3.33025	0.000867671	0.0318885	yes
652	AAEL025927-RA	5574819	uncharacterized LOC5574819	270.925	219.32	206.488	225.176	314.422	284.365	351.179	333.438	275.664	0.477531	0.11851	4.02945	5.59e-05	0.00349359	yes
373	AAEL011049-RA	5574288	condensin complex subunit 3	156.799	142.747	127.23	167.518	185.919	220.685	199.036	225.327	178.158	0.475821	0.128742	3.69592	0.000219095	0.0113341	yes
154	AAEL004798-RA	N/A		2177.32	1372.64	1716.56	1644.79	2247.43	2614.18	2219.62	2502.49	2061.88	0.471697	0.146184	3.22674	0.00125208	0.04095	yes
421	AAEL012119-RA	5575846	nucleolin	211.381	206.085	185.63	247.771	274.321	312.912	309.496	282.228	253.728	0.464351	0.115108	4.03403	5.48e-05	0.0034472	yes
499	AAEL018103-RA	5565763	uncharacterized LOC5565763	1283.17	1174.12	1290.03	1203.01	1370.7	1763.28	1750.68	1919.83	1469.35	0.458512	0.112246	4.08489	4.41e-05	0.00290671	yes
450	AAEL013113-RA	5577258	beta-lactamase-like protein 2 homolog	91.3006	134.239	124.101	125.444	158.578	167.984	166.732	160.46	141.105	0.457586	0.1408	3.2499	0.00115446	0.0386092	yes
133	AAEL003986-RG	5563910	death-associated protein 1	256.039	305.347	269.059	251.667	296.194	421.607	370.978	397.167	321.007	0.455871	0.134826	3.38118	0.000721746	0.0280917	yes
408	AAEL011741-RF	5575278	glutathione S-transferase	1370.5	1351.84	1387.01	1541.17	1966.73	1897.23	2059.14	1811.72	1673.17	0.452343	0.0689853	6.55709	5.49e-11	8.97e-09	yes
321	AAEL009285-RA	5571766	ATP-dependent RNA helicase DDX54	162.753	181.506	152.258	191.672	245.158	196.53	232.382	269.709	203.996	0.451891	0.13503	3.34659	0.000818119	0.0309582	yes
256	AAEL007947-RA	5569859	glutathione S-transferase 1	207.411	294.948	242.988	296.079	351.788	349.143	348.053	376.683	308.386	0.449415	0.130029	3.45626	0.000547718	0.0227481	yes
416	AAEL011958-RB	5575628	something about silencing protein 10	142.905	139.911	120.972	137.91	183.185	181.159	174.026	200.291	160.045	0.443857	0.111912	3.96611	7.31e-05	0.00440358	yes
207	AAEL006564-RA	5568110	mitoferrin	411.845	482.126	430.704	400.485	541.352	559.947	508.532	732.881	508.484	0.440805	0.136055	3.23989	0.00119574	0.0397297	yes
312	AAEL009120-RA	5571531	probable cytochrome P450 6a20	107.179	99.2613	99.0723	82.5904	130.325	125.165	132.343	136.562	114.062	0.440687	0.135137	3.26104	0.00111004	0.0374917	yes
88	AAEL002593-RA	5575334	tryptase	1388.37	1460.56	1406.83	1585.58	2019.59	1818.18	2182.1	1903.9	1720.64	0.439409	0.0802136	5.47799	4.3e-08	4.99e-06	yes
417	AAEL011974-RA	5575641	uncharacterized LOC5575641	122.065	135.184	132.444	160.506	209.614	171.278	189.657	176.392	162.143	0.438501	0.133066	3.29535	0.000982976	0.0346338	yes
377	AAEL011140-RA	5574423	secreted 45 kDa protein	352.301	394.209	346.232	275.821	505.809	408.432	442.881	490.484	402.021	0.435811	0.132581	3.28712	0.00101217	0.0352683	yes
452	AAEL013182-RA	5577436	putative ATP-dependent RNA helicase DHX57	441.617	333.707	390.032	448.793	522.213	553.359	517.911	590.629	474.783	0.43422	0.113535	3.82455	0.000131011	0.00727468	yes
175	AAEL005336-RA	5566353	D-3-phosphoglycerate dehydrogenase	582.538	591.786	502.662	747.209	795.623	763.065	841.996	861.477	710.794	0.426029	0.128075	3.32639	0.000879779	0.0322176	yes
107	AAEL003140-RA	5577229	retinoblastoma-binding protein 5 homolog	140.921	126.676	119.93	120.769	164.957	165.788	171.942	177.53	148.564	0.421034	0.113143	3.72125	0.00019824	0.0104673	yes
36	AAEL001216-RA	5569076	ATP-dependent RNA helicase WM6	643.074	726.971	693.506	696.564	868.533	943.126	996.222	888.789	807.098	0.420598	0.07179	5.85872	4.66e-09	5.88e-07	yes
412	AAEL011826-RA	5575422	UPF0668 protein C10orf76 homolog	160.769	153.146	148.087	175.31	218.728	203.118	208.415	225.327	186.612	0.42012	0.104523	4.0194	5.83e-05	0.00361284	yes
230	AAEL007150-RB	5568853	probable ATP-dependent RNA helicase kurz	148.86	121.004	110.544	144.144	161.312	178.963	180.279	183.22	153.541	0.417949	0.132967	3.14327	0.00167074	0.0498393	yes
147	AAEL004532-RA	5564976	glyoxylate reductase/hydroxypyruvate reductase	173.67	189.069	191.887	184.66	222.374	256.917	257.392	252.639	216.076	0.417503	0.0983125	4.24669	2.17e-05	0.00157208	yes
21	AAEL000735-RA	5566281	probable peroxisomal acyl-coenzyme A oxidase 1	200.464	225.938	245.074	229.851	248.803	292.051	323.043	341.404	263.328	0.416573	0.128055	3.25308	0.00114162	0.0383681	yes
572	AAEL021176-RA	5567828	transmembrane protein 179	420.777	559.644	514.133	616.311	637.957	716.952	704.442	756.78	615.874	0.413495	0.12866	3.21386	0.00130963	0.0421431	yes
246	AAEL007694-RC	5569500	F-box/WD repeat-containing protein 5	382.073	417.843	475.547	358.411	550.466	535.792	584.603	484.794	473.691	0.402971	0.112166	3.59265	0.000327336	0.0153839	yes
75	AAEL002207-RA	5573956	bis(5'-nucleosyl)-tetraphosphatase [asymmetrical]	339.4	411.225	363.96	402.823	510.366	473.21	506.448	516.659	440.511	0.400915	0.0853748	4.69594	2.65e-06	0.000240206	yes
581	AAEL021578-RA	5569598	zinc finger protein 706	244.13	288.33	233.602	264.912	339.029	328.283	366.81	328.886	299.248	0.40089	0.0958864	4.18088	2.9e-05	0.00206744	yes
13	AAEL000505-RA	5578434	uncharacterized LOC5578434	143.898	142.747	136.615	141.027	159.489	212.999	184.447	190.048	163.909	0.400188	0.122277	3.27281	0.00106486	0.0362655	yes
32	AAEL001114-RA	5568572	putative sodium-coupled neutral amino acid transporter 10	186.571	167.326	187.716	179.205	269.765	230.566	225.088	221.913	208.519	0.39908	0.107806	3.70182	0.000214055	0.0111298	yes
68	AAEL002098-RA	5573608	DNA repair endonuclease XPF	199.472	150.31	178.33	167.518	200.501	244.84	228.214	243.535	201.59	0.397977	0.125904	3.16096	0.0015725	0.0476742	yes
111	AAEL003293-RA	5577747	nucleolar GTP-binding protein 2	213.366	233.5	214.83	224.396	287.992	287.659	300.117	291.332	256.649	0.395673	0.0839869	4.71113	2.46e-06	0.000226752	yes
650	AAEL025815-RA	5570121	glycosaminoglycan xylosylkinase homolog	136.951	128.567	126.187	155.831	164.046	176.768	184.447	199.153	158.994	0.395499	0.124279	3.18234	0.0014609	0.0457152	yes
413	AAEL011827-RA	5575423	nucleolar complex protein 3 homolog	165.731	143.693	132.444	150.377	204.146	200.922	178.195	190.048	170.694	0.384641	0.11395	3.37552	0.000736765	0.0285428	yes
242	AAEL007586-RA	5579966	nuclear pore complex protein Nup98-Nup96	907.052	698.61	752.949	811.879	1123.72	949.714	991.012	1073.15	913.51	0.384414	0.103332	3.72018	0.00019908	0.0104845	yes
35	AAEL001171-RA	5568803	tRNA-dihydrouridine(47) synthase [NAD(P)(+)]-like	180.616	191.905	189.802	225.955	287.081	241.546	241.761	257.191	226.982	0.380027	0.11503	3.30371	0.000954142	0.0339077	yes
338	AAEL009946-RA	5572627	dnaJ homolog shv	1504.48	1463.39	1412.04	1613.63	1946.68	1842.34	2003.91	2012.01	1724.81	0.379761	0.0614547	6.17953	6.43e-10	9.06e-08	yes
103	AAEL003071-RA	5576975	pseudouridylate synthase 7 homolog	430.701	338.434	335.803	344.386	442.013	474.308	489.775	479.104	416.815	0.379546	0.103325	3.67331	0.000239428	0.0120802	yes
324	AAEL009398-RA	5571906	syntaxin-7	352.301	341.27	397.332	375.552	474.822	510.54	443.923	474.552	421.287	0.376342	0.0822494	4.57563	4.75e-06	0.000395998	yes
291	AAEL008643-RA	5570876	CWF19-like protein 1 homolog	143.898	141.802	123.058	144.923	181.362	175.67	186.531	176.392	159.204	0.375933	0.108811	3.4549	0.000550499	0.0228172	yes
681	AAEL027821-RA	5571980	ubiquitin carboxyl-terminal hydrolase MINDY-3 homolog	414.822	439.586	427.575	405.16	606.97	489.679	551.257	532.591	483.455	0.373145	0.0860163	4.33808	1.44e-05	0.00108378	yes
144	AAEL004448-RA	5564767	torsin-like protein	175.654	212.703	189.802	169.856	222.374	245.937	237.593	258.329	214.031	0.366282	0.110568	3.31274	0.000923871	0.0332366	yes
494	AAEL017301-RA	23687721	elongation factor 1-alpha	3074.45	3548.83	3556.17	3058.96	3846.88	4350.02	4884.2	3981.91	3787.68	0.366255	0.103312	3.54513	0.000392426	0.0175467	yes
394	AAEL011421-RA	5574784	multiple inositol polyphosphate phosphatase 1	271.917	266.587	297.217	351.399	350.876	377.69	404.325	401.719	340.216	0.365973	0.115465	3.16956	0.00152671	0.0470054	yes
464	AAEL013883-RA	5578881	galectin-3-binding protein A	311.613	285.494	239.859	290.625	332.649	379.886	354.305	384.649	322.385	0.360677	0.104718	3.44427	0.000572599	0.0235422	yes
295	AAEL008696-RA	5570959	mothers against decapentaplegic homolog 3	363.218	349.778	409.846	347.503	502.163	432.586	442.881	501.864	418.73	0.357117	0.09395	3.80114	0.000144034	0.00793312	yes
597	AAEL022363-RA	110681058	4-hydroxybenzoate polyprenyltransferase, mitochondrial-like	279.856	323.308	292.003	363.086	408.292	373.298	395.988	436.998	359.104	0.355729	0.108457	3.2799	0.00103845	0.0357835	yes
670	AAEL027026-RA	110678003	ribosome biogenesis protein NOP53-like	260.008	303.456	281.574	286.729	352.699	353.535	372.02	370.993	322.627	0.354698	0.080926	4.383	1.17e-05	0.000889211	yes
435	AAEL012618-RA	5576560	RNA-binding protein 34	150.845	166.381	171.03	152.714	207.792	202.02	217.793	188.91	182.186	0.353436	0.104614	3.3785	0.000728831	0.0283136	yes
231	AAEL007158-RC	5568848	ribosomal RNA processing protein 1 homolog	311.613	301.565	279.488	273.483	361.813	399.648	329.295	397.167	331.759	0.35136	0.0968506	3.62785	0.000285789	0.0138713	yes
200	AAEL006439-RB	5568002	dual specificity protein phosphatase 3	2204.12	2515.56	2513.31	2144.23	2906.35	2941.37	2954.28	3153.44	2666.58	0.350782	0.0748158	4.6886	2.75e-06	0.000247617	yes
462	AAEL013631-RA	5578308	guanine nucleotide-binding protein-like 1	555.743	407.444	500.576	525.929	616.084	619.235	633.581	662.324	565.115	0.346675	0.105402	3.28907	0.00100519	0.0351712	yes
606	AAEL022867-RA	5573302	1-acyl-sn-glycerol-3-phosphate acyltransferase delta	452.534	475.509	384.818	384.123	603.325	509.442	508.532	531.453	481.217	0.345225	0.107981	3.19711	0.00138814	0.0438411	yes
389	AAEL011274-RB	5574640	putative 1-phosphatidylinositol 3-phosphate 5-kinase	407.876	434.859	419.232	394.252	514.922	561.045	545.005	475.69	469.11	0.341748	0.07892	4.33031	1.49e-05	0.00111863	yes
86	AAEL002562-RB	5580186	transmembrane protein 203	226.267	253.353	253.416	267.25	310.776	297.54	361.6	298.16	283.545	0.340841	0.103139	3.30468	0.000950857	0.0338498	yes
297	AAEL008733-RA	5571000	m7GpppX diphosphatase	386.043	333.707	311.817	335.036	400.09	422.705	465.807	441.55	387.094	0.339367	0.0945467	3.58941	0.000331424	0.0154973	yes
272	AAEL008135-RA	5570156	conserved oligomeric Golgi complex subunit 3	225.274	218.375	200.23	230.63	291.637	284.365	268.855	260.605	247.497	0.336793	0.0918158	3.66814	0.000244324	0.0122423	yes
31	AAEL001062-RB	5568348	uncharacterized LOC5568348	251.077	207.031	219.002	226.734	278.878	279.973	306.37	269.709	254.847	0.329167	0.0965277	3.41008	0.000649427	0.0260784	yes
470	AAEL014079-RA	5563726	serine protease inhibitor 27A	326.499	395.154	390.032	399.706	452.949	477.602	449.134	521.211	426.536	0.328019	0.0959154	3.41988	0.000626483	0.0253999	yes
184	AAEL005744-RA	5566976	probable ATP-dependent RNA helicase pitchoune	446.579	422.569	386.903	391.915	514.011	503.952	496.027	554.213	464.521	0.327939	0.0785113	4.17697	2.95e-05	0.00208162	yes
180	AAEL005628-RB	5566773	RNA-binding protein NOB1	288.788	296.838	276.36	313.999	373.66	374.396	381.399	334.576	330.002	0.314235	0.083873	3.74655	0.00017928	0.00954011	yes
95	AAEL002818-RB	5576097	splicing factor U2AF 50 kDa subunit	536.887	467.001	505.79	524.371	620.641	659.859	567.93	682.809	570.661	0.314133	0.0853474	3.68064	0.000232654	0.0118555	yes
317	AAEL009142-RA	5571557	prolyl endopeptidase	1219.66	1045.55	983.423	1044.85	1359.76	1302.15	1360.95	1270.02	1198.3	0.302436	0.0798743	3.7864	0.000152844	0.00832859	yes
438	AAEL012750-RA	5576764	general transcription factor IIH subunit 1	575.591	586.114	556.891	563.329	647.071	647.782	728.41	786.368	636.444	0.298806	0.0838314	3.56438	0.000364724	0.0167478	yes
148	AAEL004586-RB	5565108	histone deacetylase Rpd3	691.702	825.287	811.35	702.797	906.81	962.889	887.847	969.588	844.784	0.29873	0.0838425	3.56299	0.000366659	0.0167613	yes
286	AAEL008491-RA	5570666	uncharacterized protein C18orf8	253.062	261.861	268.017	285.17	316.244	332.674	327.211	320.92	295.645	0.276454	0.0808853	3.41785	0.000631185	0.0255399	yes
34	AAEL001163-RA	5568826	CD109 antigen	250.084	262.806	264.888	250.888	335.383	305.226	294.907	299.298	282.935	0.267342	0.0849713	3.14626	0.00165373	0.049549	yes
618	AAEL023347-RA	110681498	eukaryotic translation initiation factor 3 subunit D	808.805	784.637	747.735	889.794	1002.5	960.693	925.361	1004.87	890.549	0.267089	0.0731469	3.65141	0.000260807	0.0127801	yes
156	AAEL004852-RB	5565536	BTB/POZ domain-containing protein 10	557.728	607.857	567.319	610.078	669.855	718.05	708.61	689.637	641.142	0.247092	0.0628303	3.93269	8.4e-05	0.00496082	yes
132	AAEL003976-RA	5579796	RNA polymerase-associated protein Rtf1	1694.02	1803.72	1793.73	1774.91	2036.91	2055.33	1932	2311.31	1925.24	0.237759	0.0682064	3.48587	0.000490534	0.020839	yes
73	AAEL002160-RA	5580070	obg-like ATPase 1	885.219	968.034	915.637	1019.91	1116.42	1062.8	1133.78	1076.56	1022.3	0.210966	0.0642311	3.28448	0.00102169	0.0354359	yes
360	AAEL010765-RA	5573863	lysosome-associated membrane glycoprotein 1	4400.29	4305.1	4235.08	4479.36	4651.62	4685.99	4732.06	4909.39	4549.86	0.122927	0.0368494	3.33593	0.000850141	0.0317871	yes
221	AAEL006928-RA	5568521	dihydrolipoyl dehydrogenase, mitochondrial	3813.79	4156.68	4157.91	4135.75	3705.62	3513.39	3422.17	3736.1	3830.18	-0.177963	0.0532025	-3.34501	0.000822784	0.0310772	yes
82	AAEL002399-RA	5574496	aspartate aminotransferase, mitochondrial	2188.24	2441.83	2374.61	2379.54	2076.09	2068.51	2098.74	1927.8	2194.42	-0.199531	0.0551498	-3.61798	0.000296916	0.0142757	yes
274	AAEL008144-RD	5570163	long-chain fatty acid transport protein 4	2286.49	2624.28	2487.24	2546.28	2209.15	1981.77	2243.58	2117.84	2312.08	-0.217449	0.0674897	-3.22196	0.00127315	0.041229	yes
222	AAEL006977-RA	5568618	serine/threonine-protein phosphatase PP2A 65 kDa regulatory subunit	2101.9	2045.73	2052.36	2162.93	1841.87	1779.75	1715.25	1821.96	1940.22	-0.224717	0.0445281	-5.04664	4.5e-07	4.66e-05	yes
24	AAEL000931-RA	5567473	alkaline phosphatase 4	7382.45	7164.77	6486.63	7049.79	5815.43	5965.08	6543.18	5701.45	6513.6	-0.225236	0.0680105	-3.31178	0.000927033	0.0332917	yes
174	AAEL005308-RA	5566309	probable pyruvate dehydrogenase E1 component subunit alpha, mitochondrial	692.694	715.626	685.163	757.338	578.718	596.179	636.707	624.77	660.899	-0.229763	0.0658742	-3.4879	0.000486825	0.0207245	yes
667	AAEL026946-RC	110678647	C-myc promoter-binding protein	644.066	617.311	637.191	596.053	508.543	535.792	524.163	548.523	576.455	-0.236533	0.0626174	-3.77744	0.00015845	0.00856554	yes
160	AAEL004930-RA	5565700	carbonic anhydrase	2455.19	2490.04	2666.61	2406.03	2314.87	2087.17	1974.73	2045.01	2304.96	-0.249379	0.0686307	-3.63364	0.000279452	0.0136285	yes
465	AAEL013894-RB	5567316	nose resistant to fluoxetine protein 6	587.5	555.863	627.805	597.611	523.125	477.602	452.26	531.453	544.152	-0.254704	0.0799329	-3.18647	0.00144019	0.0451361	yes
422	AAEL012207-RF	5580231	myosin light chain alkali	10916.4	11045.4	10235.7	10322.2	9759.83	8631.97	9079.59	8137.94	9766.14	-0.25567	0.070515	-3.62575	0.00028812	0.0139513	yes
65	AAEL002031-RB	5573116	cytochrome P450 CYP12A2	1101.56	1020.03	1100.22	1035.5	879.469	903.601	840.953	938.862	977.524	-0.256771	0.0597342	-4.29856	1.72e-05	0.00127379	yes
114	AAEL003454-RA	5578218	MOB kinase activator-like 4	525.971	623.928	575.662	527.487	461.152	461.133	479.354	470	515.586	-0.266667	0.0800226	-3.3324	0.000861005	0.0318031	yes
270	AAEL008108-RA	5570133	guanine nucleotide-binding protein subunit beta-2	1705.93	1930.4	1808.33	1769.46	1491.91	1332.89	1678.78	1485.11	1650.35	-0.268335	0.0846753	-3.16898	0.00152973	0.0470054	yes
544	AAEL019852-RA	5579471	restin homolog	972.55	815.833	868.708	931.089	746.41	718.05	730.494	785.23	821.045	-0.268516	0.0756483	-3.54953	0.000385915	0.0173921	yes
198	AAEL006362-RA	5567930	calcium-binding mitochondrial carrier protein Aralar1	1411.19	1473.79	1417.26	1396.24	1217.59	1156.13	1087.92	1238.16	1299.79	-0.277705	0.0577425	-4.80937	1.51e-06	0.000143233	yes
142	AAEL004361-RB	5564642	uncharacterized family 31 glucosidase KIAA1161	515.055	494.416	456.775	480.738	399.179	404.04	385.567	417.651	444.178	-0.27835	0.0712084	-3.90895	9.27e-05	0.00539654	yes
308	AAEL009074-RC	5571453	death-associated inhibitor of apoptosis 1	3040.71	2964.6	2865.8	2822.1	2675.77	2334.21	2245.67	2340.9	2661.22	-0.284324	0.0698187	-4.07231	4.65e-05	0.00304861	yes
70	AAEL002137-RD	5580095	transcriptional adapter 2B	679.793	732.643	752.949	750.326	609.705	578.612	584.603	614.528	662.895	-0.288813	0.0627684	-4.60124	4.2e-06	0.000357573	yes
228	AAEL007041-RB	5568706	low-density lipoprotein receptor-related protein 1	661.93	674.031	673.692	564.887	581.452	502.854	505.406	509.83	584.26	-0.290763	0.0923845	-3.14732	0.00164776	0.0494424	yes
374	AAEL011051-RC	5574290	lysophospholipid acyltransferase 1	1942.12	1995.62	2003.35	1906.59	1796.3	1672.16	1489.12	1429.35	1779.33	-0.296197	0.0845034	-3.50515	0.000456351	0.0197985	yes
340	AAEL010037-RB	5572750	phosphoglucomutase	2723.14	3269	3197.43	3383.87	2570.97	2498.9	2388.43	2779.03	2851.35	-0.296918	0.089116	-3.33182	0.000862805	0.0318031	yes
211	AAEL006609-RB	5568166	Krueppel-like factor 3	1778.38	1763.07	1721.77	1838.02	1597.63	1509.66	1432.85	1232.47	1609.23	-0.298244	0.0878124	-3.39638	0.000682846	0.0268849	yes
686	AAEL028220-RA	5569131	mediator of RNA polymerase II transcription subunit 1	465.435	488.744	500.576	437.885	399.179	383.179	378.273	370.993	428.033	-0.301268	0.0755593	-3.98718	6.69e-05	0.0040907	yes
617	AAEL023335-RA	5574464	protein fem-1 homolog CG6966	250.084	242.954	227.345	219.721	194.121	193.237	188.615	183.22	212.412	-0.30504	0.0954633	-3.19536	0.00139656	0.0439713	yes
149	AAEL004589-RC	5565095	calcium-binding mitochondrial carrier protein SCaMC-2	2152.51	2142.15	2154.56	1802.96	1820	1598.59	1586.04	1661.5	1864.79	-0.306789	0.0856295	-3.58275	0.000339998	0.0157898	yes
325	AAEL009507-RC	5572093	glucose-6-phosphate 1-dehydrogenase	644.066	695.774	696.635	730.847	601.502	537.988	600.234	491.622	624.834	-0.309489	0.0886197	-3.49233	0.000478824	0.0205552	yes
310	AAEL009092-RA	5571461	ceramide synthase 6	877.28	724.135	784.235	678.643	627.932	597.277	620.034	623.632	691.646	-0.309854	0.0937294	-3.30583	0.000946952	0.0338097	yes
401	AAEL011564-RB	5575011	choline-phosphate cytidylyltransferase B	1527.3	1600.47	1518.41	1901.92	1259.51	1241.76	1368.24	1362.2	1472.48	-0.324982	0.0933697	-3.48059	0.000500307	0.0211225	yes
334	AAEL009756-RB	5572367	BTB/POZ domain-containing protein 6	221.305	214.593	226.302	219.721	170.426	194.335	167.774	171.84	198.287	-0.325312	0.0975398	-3.33517	0.000852469	0.0317871	yes
526	AAEL019650-RA	110674010	von Willebrand factor D and EGF domain-containing protein-like	1976.86	2197.93	2102.42	2531.47	1903.85	1553.58	1817.38	1744.58	1978.51	-0.327772	0.103551	-3.1653	0.00154922	0.0473196	yes
40	AAEL001295-RA	5569811	protein takeout	425.739	414.061	451.561	461.259	387.331	304.128	348.053	349.37	392.688	-0.333792	0.0936668	-3.56361	0.000365785	0.0167589	yes
610	AAEL023125-RB	5572392	uncharacterized LOC5572392	341.385	397.99	347.274	419.964	313.51	288.757	304.286	290.194	337.92	-0.334215	0.0990197	-3.37524	0.000737526	0.0285428	yes
83	AAEL002417-RC	5574604	troponin T, skeletal muscle	1354.62	1473.79	1273.34	1453.12	1198.45	1197.85	1028.53	971.864	1243.95	-0.33719	0.0966167	-3.48998	0.000483061	0.0206206	yes
629	AAEL024343-RA	110679098	TAR DNA-binding protein 43-like	2037.39	1997.51	1979.36	1598.05	1619.5	1512.95	1341.15	1520.39	1700.79	-0.343987	0.103772	-3.31485	0.000916936	0.0331037	yes
48	AAEL001495-RA	5570921	uncharacterized LOC5570921	721.473	759.112	746.692	702.797	664.387	542.38	565.846	520.073	652.845	-0.350888	0.091501	-3.8348	0.000125667	0.00705462	yes
328	AAEL009604-RE	5572193	receptor expression-enhancing protein 5	613.302	593.677	599.648	523.592	493.05	400.746	481.438	444.964	518.802	-0.352935	0.0950095	-3.71474	0.000203415	0.0106853	yes
322	AAEL009313-RB	5571785	probable elongation factor 1-delta	340.393	333.707	361.875	331.141	244.246	263.504	286.57	276.537	304.747	-0.353152	0.085899	-4.11124	3.94e-05	0.00262796	yes
371	AAEL011019-RA	5574245	cytoplasmic dynein 1 light intermediate chain 1	1522.34	1487.03	1519.46	1407.15	1229.43	1187.97	1191.09	1026.49	1321.37	-0.355242	0.0720797	-4.92847	8.29e-07	8.18e-05	yes
235	AAEL007290-RE	5568996	uncharacterized LOC5568996	441.617	448.094	394.203	403.602	366.37	288.757	332.422	327.748	375.352	-0.356594	0.0974361	-3.65977	0.000252438	0.0125506	yes
18	AAEL000706-RA	5565891	serine palmitoyltransferase 2	891.174	802.598	796.75	823.566	679.88	617.04	671.095	613.39	736.937	-0.358725	0.0694562	-5.16477	2.41e-07	2.58e-05	yes
153	AAEL004715-RA	5565301	protein BTG1	552.766	454.711	487.019	429.314	376.395	391.963	367.852	360.751	427.596	-0.359558	0.0990442	-3.63027	0.000283121	0.0137745	yes
277	AAEL008216-RA	5570276	cytoplasmic aconitate hydratase	1254.39	1331.99	1225.37	1125.88	1083.62	917.874	932.656	906.997	1097.35	-0.360447	0.0877241	-4.10887	3.98e-05	0.00263779	yes
344	AAEL010145-RD	5572931	sodium/potassium-transporting ATPase subunit beta-2	2804.52	2924.9	2940.88	2403.69	2312.14	2010.32	2095.61	2188.4	2460.06	-0.362897	0.0873179	-4.15604	3.24e-05	0.0022506	yes
102	AAEL003047-RB	5576886	netrin-B	478.336	432.023	433.832	364.644	355.433	288.757	348.053	331.162	379.03	-0.365154	0.115273	-3.16772	0.00153641	0.0470702	yes
669	AAEL026967-RA	110680584	troponin T, skeletal muscle-like	5241.85	5265.57	4758.6	4456.76	4231.48	3528.76	3718.12	3812.35	4376.69	-0.366811	0.0870722	-4.21272	2.52e-05	0.00180907	yes
326	AAEL009507-RD	5572093	glucose-6-phosphate 1-dehydrogenase	581.545	584.223	688.292	515.021	508.543	468.818	430.376	423.341	525.02	-0.368528	0.114202	-3.22698	0.00125102	0.04095	yes
12	AAEL000445-RD	5577360	uncharacterized LOC5577360	699.641	570.989	530.819	590.599	528.593	428.195	453.302	440.412	530.319	-0.368755	0.116557	-3.16374	0.00155754	0.0475028	yes
284	AAEL008468-RA	5570648	cystathionine beta-synthase	242.145	249.571	241.945	236.084	179.539	172.376	225.088	171.84	214.824	-0.371469	0.113568	-3.27088	0.00107212	0.036438	yes
563	AAEL020559-RF	5572256	signal transducer and transcription activator	908.044	669.305	763.378	757.338	579.629	534.694	625.244	654.358	686.499	-0.371931	0.116363	-3.19631	0.00139196	0.0438941	yes
196	AAEL006247-RL	5567679	uncharacterized LOC5567679	243.138	209.867	242.988	198.684	167.692	166.886	181.321	170.702	197.66	-0.377504	0.112588	-3.35298	0.000799465	0.0304781	yes
541	AAEL019813-RA	5573135	nuclear pore complex protein DDB_G0274915	438.64	527.503	509.962	497.88	359.079	385.375	361.6	415.375	436.927	-0.377973	0.0904695	-4.1779	2.94e-05	0.00208022	yes
372	AAEL011022-RA	5574255	paxillin	1990.75	1684.61	1626.87	1882.44	1542.94	1263.72	1442.23	1268.89	1587.81	-0.380367	0.103328	-3.68116	0.000232171	0.0118555	yes
186	AAEL005829-RA	5567106	protein big brother	254.054	315.745	293.045	250.888	223.285	188.845	220.92	220.775	245.945	-0.380376	0.117471	-3.23803	0.00120356	0.0399247	yes
183	AAEL005734-RA	5566986	uncharacterized LOC5566986	744.299	692.938	684.12	571.899	508.543	539.086	515.826	501.864	594.822	-0.381117	0.0962959	-3.95777	7.57e-05	0.0045468	yes
307	AAEL009043-RA	5571415	bicaudal D-related protein homolog	551.773	464.165	501.619	444.897	390.976	370.004	384.525	356.199	433.02	-0.382545	0.0925535	-4.13323	3.58e-05	0.00245275	yes
92	AAEL002765-RB	5576000	nuclear receptor subfamily 2 group F member 1-B	300.697	343.16	343.103	347.503	272.499	258.015	220.92	271.985	294.735	-0.383576	0.101482	-3.77973	0.000156998	0.00853216	yes
181	AAEL005651-RD	5566800	ethanolamine-phosphate cytidylyltransferase	373.142	376.247	406.718	363.086	314.422	273.386	289.696	282.228	334.866	-0.384438	0.0834347	-4.60765	4.07e-06	0.000348188	yes
578	AAEL021542-RA	5577698	proteoglycan Cow	1155.15	1086.2	1077.28	895.248	852.128	765.261	807.607	798.886	929.721	-0.384465	0.0945178	-4.06764	4.75e-05	0.00306128	yes
559	AAEL020127-RA	5563963	glucose dehydrogenase [FAD, quinone]	368.18	325.199	320.16	324.128	307.131	220.685	238.635	253.777	294.737	-0.387059	0.122879	-3.14991	0.00163319	0.0491496	yes
427	AAEL012347-RC	5576154	uncharacterized LOC5576154	545.819	495.361	551.676	458.143	456.595	339.262	365.768	399.443	451.508	-0.390426	0.118619	-3.29142	0.000996818	0.0349983	yes
648	AAEL025611-RA	110674034	centrosomal and chromosomal factor-like	1187.9	1021.92	1060.59	808.762	827.521	770.751	763.84	745.399	898.336	-0.390988	0.123867	-3.15652	0.00159665	0.0483347	yes
442	AAEL012886-RA	5576941	venom carboxylesterase-6	1276.22	1359.41	1329.65	1564.54	1286.85	953.008	993.096	979.83	1217.83	-0.392037	0.123607	-3.17165	0.00151578	0.0468584	yes
426	AAEL012326-RA	5580239	calmodulin	13895.6	14572.5	12938.8	10689.2	10010.5	9627.79	9652.73	10349.1	11467	-0.394135	0.104659	-3.76591	0.000165945	0.00892349	yes
237	AAEL007328-RA	5569034	uncharacterized protein DDB_G0271670	219.32	185.288	172.073	180.764	143.996	137.242	152.143	142.252	166.635	-0.394348	0.119688	-3.29481	0.000984896	0.0346392	yes
514	AAEL018699-RJ	5576943	sorbin and SH3 domain-containing protein 1	456.503	472.673	476.59	435.547	333.56	304.128	367.852	393.753	405.076	-0.396091	0.0960237	-4.12493	3.71e-05	0.00252594	yes
229	AAEL007114-RA	5568761	protein pinocchio	1747.61	1858.55	2157.69	1887.89	1631.35	1323.01	1498.5	1328.06	1679.08	-0.403571	0.102562	-3.9349	8.32e-05	0.00494405	yes
419	AAEL012062-RD	5575790	sodium/potassium-transporting ATPase subunit alpha	3584.54	2665.87	2841.81	2583.68	2400.54	2183.79	2017.45	2219.13	2562.1	-0.404166	0.122271	-3.3055	0.000948074	0.0338097	yes
63	AAEL001920-RA	5572993	protein msta	536.887	620.147	534.99	562.549	473.911	391.963	360.558	476.828	494.729	-0.404382	0.116594	-3.46828	0.000523809	0.0219334	yes
351	AAEL010348-RB	110676984	facilitated trehalose transporter Tret1-2 homolog	801.858	691.047	621.548	608.519	517.656	598.375	467.891	470	597.112	-0.40619	0.127972	-3.17405	0.00150328	0.0465424	yes
672	AAEL027164-RA	5577205	probable serine hydrolase	960.641	901.86	929.194	840.707	802.914	610.452	695.063	627.046	795.985	-0.406667	0.105096	-3.86948	0.000109068	0.00624282	yes
105	AAEL003111-RA	5577138	carboxypeptidase N subunit 2	151.837	159.763	161.644	178.426	133.971	131.752	114.628	110.387	142.801	-0.409324	0.124958	-3.2757	0.00105402	0.0360572	yes
363	AAEL010850-RA	5574015	troponin I	1015.22	830.959	887.479	906.156	760.991	563.241	733.62	675.981	796.706	-0.41179	0.116015	-3.54944	0.000386047	0.0173921	yes
653	AAEL025977-RD	5564765	titin	214.358	198.523	206.488	219.721	133.971	184.453	154.227	160.46	184.025	-0.412281	0.121248	-3.40032	0.000673081	0.0266256	yes
598	AAEL022493-RA	110676310	uncharacterized LOC110676310	283.826	326.144	350.403	359.969	242.424	265.7	251.14	228.741	288.543	-0.420042	0.106838	-3.93158	8.44e-05	0.0049695	yes
333	AAEL009685-RA	5572258	farnesol dehydrogenase-like	1048.96	1161.83	1120.04	1083.02	717.246	849.802	845.122	876.271	962.787	-0.42621	0.0810689	-5.25739	1.46e-07	1.61e-05	yes
71	AAEL002141-RA	5580091	neprilysin-2	897.128	818.669	920.851	867.199	678.057	559.947	633.581	735.157	763.824	-0.426253	0.0960592	-4.4374	9.11e-06	0.000710126	yes
94	AAEL002817-RB	5576118	uncharacterized protein KIAA1683 homolog	1105.53	950.072	877.05	863.303	805.648	723.539	682.558	604.286	826.499	-0.4293	0.122548	-3.50311	0.000459856	0.0199082	yes
162	AAEL004987-RA	5565773	putative beta-carotene-binding protein	3010.94	3464.69	3343.43	3555.28	2819.77	2368.25	2511.4	2200.92	2909.33	-0.433603	0.0972923	-4.45671	8.32e-06	0.000661749	yes
543	AAEL019849-RV	5567708	uncharacterized LOC5567708	560.705	586.114	505.79	419.185	420.14	384.277	392.862	333.438	450.314	-0.433894	0.132957	-3.2634	0.00110083	0.0372422	yes
402	AAEL011564-RD	5575011	choline-phosphate cytidylyltransferase B	1081.71	1315.92	1262.91	1183.54	848.483	820.158	837.827	1064.04	1051.82	-0.440689	0.111909	-3.93791	8.22e-05	0.00489671	yes
671	AAEL027111-RB	5577427	serine/threonine-protein kinase GL21140	285.811	312.909	324.331	344.386	241.512	229.468	229.256	232.155	274.979	-0.444527	0.0923892	-4.81146	1.5e-06	0.000142404	yes
454	AAEL013291-RA	5577581	uncharacterized LOC5577581	322.529	296.838	322.246	297.637	189.564	231.664	227.172	261.743	268.674	-0.448648	0.112996	-3.97046	7.17e-05	0.00433667	yes
614	AAEL023182-RA	5570245	serine/threonine-protein phosphatase 2A 56 kDa regulatory subunit	201.457	205.14	232.559	176.089	128.503	162.494	161.521	139.976	175.967	-0.458913	0.13703	-3.34899	0.000811069	0.0307484	yes
208	AAEL006572-RC	5568132	troponin C	355.279	250.517	305.56	303.091	230.576	226.175	205.289	217.361	261.731	-0.464342	0.125196	-3.70891	0.000208152	0.0108782	yes
586	AAEL021838-RA	110678344	myosin heavy chain, muscle-like	3774.09	4989.53	4421.75	3612.94	3136.01	3196.09	2657.29	3139.78	3615.94	-0.469715	0.125329	-3.74785	0.000178358	0.00951584	yes
376	AAEL011088-RC	5574368	dopamine N-acetyltransferase	260.008	302.511	242.988	257.121	199.589	211.902	169.858	184.358	228.542	-0.472693	0.116196	-4.06808	4.74e-05	0.00306128	yes
281	AAEL008356-RB	5570461	protein spinster	1162.1	1213.82	1126.3	1465.59	849.394	881.642	765.924	1081.11	1068.24	-0.4747	0.136025	-3.4898	0.000483374	0.0206206	yes
309	AAEL009074-RE	5571453	death-associated inhibitor of apoptosis 1	1241.49	1408.56	1526.76	1405.59	994.301	803.689	1065	1153.95	1199.92	-0.474847	0.126008	-3.76837	0.000164315	0.00885916	yes
323	AAEL009362-RA	5571884	cationic amino acid transporter 2	322.529	439.586	445.304	398.148	308.042	308.52	267.813	267.433	344.672	-0.478111	0.129051	-3.70483	0.000211535	0.0110268	yes
515	AAEL018699-RM	5576943	sorbin and SH3 domain-containing protein 1	767.124	605.966	602.777	550.862	522.213	375.494	458.512	452.93	541.985	-0.479977	0.143313	-3.34916	0.00081056	0.0307484	yes
353	AAEL010541-RB	5573499	calcium/calmodulin-dependent 3',5'-cyclic nucleotide phosphodiesterase 1	315.583	260.915	314.946	251.667	195.944	203.118	212.583	203.705	244.807	-0.484315	0.114449	-4.2317	2.32e-05	0.00167464	yes
484	AAEL015077-RA	5566179	DDB1- and CUL4-associated factor 6	1039.04	1113.62	922.937	1224.05	776.485	705.972	760.714	830.751	921.696	-0.485444	0.105808	-4.58798	4.48e-06	0.000377911	yes
556	AAEL019976-RA	110675246	uncharacterized protein DDB_G0283357-like	117.103	97.3706	106.372	98.9526	72.9094	74.6596	72.9452	78.523	89.8545	-0.487879	0.147541	-3.30673	0.000943906	0.0338097	yes
318	AAEL009185-RA	5571596	arginine kinase	6663.95	5578.48	6098.68	5574.07	5107.3	3663.81	4041.16	4202.69	5116.27	-0.490831	0.120855	-4.06133	4.88e-05	0.00313188	yes
459	AAEL013600-RD	5578281	integrin alpha-PS2	691.702	527.503	563.148	478.401	479.379	346.948	362.642	410.823	482.568	-0.496714	0.155042	-3.20374	0.00135657	0.0431778	yes
205	AAEL006535-RA	5568073	acetylcholine receptor subunit alpha-like 1	450.549	687.266	584.005	733.184	427.431	445.762	461.639	406.271	524.513	-0.496875	0.158148	-3.14183	0.00167897	0.0499389	yes
592	AAEL022184-RA	5579017	protein msta	258.024	211.757	212.745	251.667	183.185	131.752	175.068	168.426	199.078	-0.503518	0.139634	-3.60599	0.000310963	0.0147088	yes
348	AAEL010260-RB	5573072	uncharacterized LOC5573072	429.708	440.531	506.833	458.922	381.863	247.035	314.706	348.232	390.979	-0.505165	0.141942	-3.55894	0.000372349	0.0169456	yes
432	AAEL012522-RA	5566511	sialin	180.616	146.529	144.958	119.99	99.339	110.891	100.039	105.835	126.025	-0.505973	0.160552	-3.15146	0.00162456	0.0489619	yes
11	AAEL000438-RA	5577347	epoxide hydrolase 4	1408.21	1539.97	1465.23	1550.52	1072.68	1043.04	1088.97	993.487	1270.26	-0.506542	0.0578887	-8.75028	2.13e-18	5.3e-16	yes
636	AAEL024800-RA	110675839	vesicle-associated membrane protein/synaptobrevin-binding protein-like	1023.16	773.293	869.75	737.859	603.325	618.138	590.856	581.525	724.739	-0.506687	0.115587	-4.38359	1.17e-05	0.000889211	yes
444	AAEL012914-RC	5565863	cyclin-dependent kinase 14	177.639	152.201	146.001	124.665	99.339	111.989	97.9549	112.663	127.807	-0.507468	0.15289	-3.31917	0.000902866	0.0329449	yes
620	AAEL023521-RA	5568876	uncharacterized LOC5568876	2025.48	2122.3	1930.35	1582.46	1415.35	1385.59	1360.95	1209.71	1629.02	-0.511218	0.109205	-4.68127	2.85e-06	0.000252195	yes
364	AAEL010850-RH	5574015	troponin I	594.447	522.776	499.533	415.289	405.558	305.226	412.661	298.16	431.706	-0.512723	0.162809	-3.14924	0.00163697	0.0491908	yes
352	AAEL010509-RF	5573460	amphiphysin	1000.34	964.252	898.951	719.159	690.816	550.066	560.636	701.017	760.654	-0.516557	0.141108	-3.66071	0.000251518	0.0125354	yes
215	AAEL006820-RA	5568403	lipid storage droplets surface-binding protein 2	6107.22	4989.53	5649.21	6068.83	4710.86	3898.77	3975.51	3323	4840.37	-0.51999	0.124177	-4.18749	2.82e-05	0.00201522	yes
600	AAEL022609-RA	5566824	PDZ and LIM domain protein Zasp	3672.87	3074.26	2703.11	2400.57	2498.06	1829.16	2074.77	1835.62	2511.05	-0.524225	0.163838	-3.19966	0.00137588	0.0435888	yes
247	AAEL007696-RD	5569526	embryonic polarity protein dorsal	288.788	270.369	309.731	271.925	195.033	200.922	164.648	232.155	241.696	-0.525775	0.120614	-4.35916	1.31e-05	0.000988134	yes
303	AAEL008928-RD	5571227	G protein-activated inward rectifier potassium channel 3	430.701	466.055	435.918	385.681	252.449	337.066	251.14	352.784	363.974	-0.527751	0.14321	-3.68515	0.000228565	0.0117349	yes
155	AAEL004824-RB	5565491	uncharacterized LOC5565491	465.435	381.92	373.346	328.024	293.46	252.525	255.308	266.295	327.039	-0.533408	0.128738	-4.14335	3.42e-05	0.00236281	yes
101	AAEL003006-RC	5580280	probable pseudouridine-5'-phosphatase	564.675	462.274	417.146	549.304	405.558	295.345	347.011	325.472	420.848	-0.536607	0.143833	-3.73077	0.000190897	0.0101057	yes
673	AAEL027331-RC	5568576	serine-enriched protein	285.811	283.604	299.303	215.826	180.451	174.572	184.447	205.981	228.749	-0.538153	0.134889	-3.98959	6.62e-05	0.00406143	yes
631	AAEL024520-RC	110676249	proton-coupled amino acid transporter 1-like	615.287	786.527	862.45	808.762	505.809	612.648	471.017	523.487	648.248	-0.5411	0.134022	-4.03738	5.41e-05	0.00341274	yes
587	AAEL021865-RA	5578235	hyaluronidase A	102.217	88.8625	88.6436	91.161	69.2639	72.4637	51.0616	61.4528	78.1408	-0.542753	0.170837	-3.17703	0.00148792	0.0462994	yes
562	AAEL020477-RB	5564409	pheromone-processing carboxypeptidase KEX1	229.244	192.85	138.701	203.359	130.325	132.85	136.512	125.182	161.128	-0.543686	0.168674	-3.2233	0.00126722	0.0411299	yes
668	AAEL026960-RB	110674225	uncharacterized membrane protein DDB_G0293934-like	320.545	323.308	347.274	310.883	202.323	232.762	246.971	210.533	274.325	-0.544477	0.0961964	-5.66006	1.51e-08	1.85e-06	yes
684	AAEL027938-RG	5576722	sarcalumenin	522.994	402.717	374.389	364.644	322.624	219.587	271.981	322.058	350.124	-0.549544	0.17377	-3.16249	0.00156429	0.047535	yes
522	AAEL019512-RG	5579140	MAGUK p55 subfamily member 5-A	174.662	175.834	158.516	148.818	125.769	108.696	84.408	128.596	138.162	-0.553825	0.159903	-3.46352	0.000533159	0.0222793	yes
607	AAEL022930-RB	5572314	transmembrane protein 41 homolog	769.109	722.244	536.033	620.207	470.265	449.056	446.008	430.169	555.386	-0.55977	0.125192	-4.47128	7.78e-06	0.000623061	yes
254	AAEL007920-RH	5569782	MOB kinase activator-like 2	337.415	274.15	256.545	254.783	215.994	170.18	181.321	192.324	235.339	-0.559832	0.13568	-4.12612	3.69e-05	0.00252138	yes
113	AAEL003428-RA	5578104	regulator of microtubule dynamics protein 1	999.345	1081.48	1235.8	997.317	731.828	704.874	775.303	704.431	903.796	-0.56344	0.0907872	-6.20616	5.43e-10	7.81e-08	yes
141	AAEL004353-RA	5564644	uncharacterized LOC5564644	234.206	256.189	306.603	280.496	176.805	185.551	193.826	172.978	225.832	-0.563453	0.115535	-4.87688	1.08e-06	0.000104373	yes
637	AAEL024887-RA	5576537	uncharacterized LOC5576537	359.248	392.318	349.36	299.195	278.878	234.958	215.709	213.947	292.952	-0.564839	0.131407	-4.29838	1.72e-05	0.00127379	yes
128	AAEL003894-RA	5579191	beta-1,3-glucan-binding protein	237.183	203.249	178.33	145.702	127.591	114.185	127.133	145.666	159.88	-0.568771	0.179553	-3.16771	0.00153645	0.0470702	yes
457	AAEL013458-RD	5577984	glutamine synthetase 2 cytoplasmic	8273.62	7458.78	7450.24	7289.77	5261.32	5165.79	4688.29	5424.91	6376.59	-0.568989	0.0696505	-8.16921	3.1e-16	7.21e-14	yes
104	AAEL003104-RB	5577066	RING finger protein nhl-1	1935.18	1308.36	1222.24	1500.65	1169.28	831.137	910.772	1098.18	1246.98	-0.573266	0.178709	-3.20781	0.00133748	0.0426365	yes
683	AAEL027912-RA	5580178	sodium-coupled monocarboxylate transporter 1	640.097	701.446	871.836	896.807	520.391	478.7	463.723	628.184	650.148	-0.573734	0.15291	-3.7521	0.000175359	0.00938035	yes
560	AAEL020302-RA	5568591	uncharacterized LOC5568591	246.115	263.751	256.545	216.605	175.894	159.201	176.11	144.528	204.844	-0.577509	0.116421	-4.96051	7.03e-07	7.08e-05	yes
547	AAEL019860-RB	5575615	uncharacterized LOC5575615	160.769	131.403	207.53	175.31	114.832	130.654	113.586	92.1792	140.783	-0.579041	0.183082	-3.16274	0.00156293	0.047535	yes
571	AAEL021138-RA	5565349	synaptogenesis protein syg-2	136.951	110.605	135.573	114.536	96.6049	82.3451	68.7769	83.0751	103.558	-0.582224	0.16313	-3.56907	0.000358249	0.0165179	yes
564	AAEL020614-RB	23687616	protein gone early	563.682	430.132	501.619	479.18	359.99	298.638	320.959	335.714	411.239	-0.583897	0.110435	-5.28723	1.24e-07	1.37e-05	yes
461	AAEL013612-RD	5578300	slit homolog 1 protein	1284.16	1002.07	1236.84	1162.5	760.991	662.055	825.322	877.409	976.418	-0.583971	0.11924	-4.89745	9.71e-07	9.49e-05	yes
49	AAEL001500-RA	5570925	insulin gene enhancer protein isl-1	98.2474	86.9718	96.9866	81.8112	60.1502	55.9947	70.861	54.6247	75.7059	-0.5844	0.170572	-3.42611	0.000612282	0.024923	yes
306	AAEL009035-RA	5571388	cilia- and flagella-associated protein 52	170.692	124.786	128.273	188.555	87.4912	104.304	103.165	112.663	127.491	-0.593657	0.188292	-3.15285	0.00161687	0.0488022	yes
138	AAEL004269-RA	5564467	neurocalcin homolog	153.822	136.13	152.258	100.511	81.1117	82.3451	90.6604	104.697	112.692	-0.594408	0.189142	-3.14265	0.00167426	0.0498715	yes
381	AAEL011222-RA	5574548	scavenger receptor class B member 1	440.625	541.683	589.219	493.984	426.52	299.736	364.726	274.261	428.844	-0.594646	0.164869	-3.60679	0.000310014	0.0146979	yes
261	AAEL008028-RA	5569932	uncharacterized LOC5569932	331.461	338.434	352.489	324.907	239.69	180.061	249.056	219.637	279.467	-0.597008	0.112283	-5.317	1.05e-07	1.18e-05	yes
633	AAEL024632-RF	5564460	neuronal calcium sensor 2	89.3158	79.409	99.0723	76.3571	67.4412	51.603	53.1458	53.4867	71.2289	-0.597331	0.185522	-3.21973	0.00128313	0.0413558	yes
479	AAEL014511-RB	5573065	AN1-type zinc finger protein 6	778.04	820.56	809.264	543.85	407.381	455.643	447.05	629.322	611.389	-0.60613	0.186755	-3.24559	0.00117208	0.0391343	yes
519	AAEL019477-RI	5567344	rap1 GTPase-activating protein 1	163.746	155.037	135.573	167.518	112.098	109.794	72.9452	113.801	128.814	-0.608007	0.171336	-3.54861	0.000387267	0.0173921	yes
398	AAEL011470-RA	5574871	probable sulfoacetate transporter SauU	474.366	338.434	479.718	469.83	239.69	295.345	311.58	310.678	364.955	-0.608434	0.150457	-4.0439	5.26e-05	0.00333607	yes
485	AAEL015116-RA	5566258	phenoloxidase 2	379.096	558.699	644.491	598.39	288.903	390.865	365.768	381.235	450.931	-0.613407	0.185006	-3.31561	0.000914425	0.0331037	yes
661	AAEL026610-RA	110676966	annulin-like	114.126	103.988	102.201	89.6027	60.1502	76.8555	70.861	59.1767	84.6201	-0.616316	0.168024	-3.66802	0.000244438	0.0122423	yes
599	AAEL022582-RA	110681051	annulin-like	114.126	103.988	102.201	89.6027	60.1502	76.8555	70.861	59.1767	84.6201	-0.616316	0.168024	-3.66802	0.000244438	0.0122423	yes
253	AAEL007920-RC	5569782	MOB kinase activator-like 2	657.96	536.956	463.033	417.627	381.863	332.674	319.917	312.954	427.873	-0.621229	0.159528	-3.89417	9.85e-05	0.00567168	yes
362	AAEL010815-RL	5573975	F-BAR domain only protein 2	151.837	124.786	113.672	121.548	65.6184	84.541	87.5342	95.5932	105.641	-0.624269	0.173069	-3.60704	0.000309705	0.0146979	yes
463	AAEL013826-RC	5578714	serine/threonine-protein kinase Warts	447.572	379.084	378.56	303.87	228.753	234.958	202.162	311.816	310.847	-0.626409	0.173466	-3.61114	0.000304854	0.0145546	yes
379	AAEL011183-RA	5574465	uncharacterized LOC5574465	116.111	105.879	110.544	91.161	49.2138	70.2679	76.0714	78.523	87.2213	-0.632314	0.192984	-3.27651	0.00105099	0.0360334	yes
567	AAEL020895-RA	110679642	neuropeptide-like 3	395.967	538.847	391.075	342.049	281.612	253.623	326.169	212.809	342.769	-0.633052	0.186187	-3.40008	0.000673653	0.0266256	yes
151	AAEL004631-RA	5565155	actin-87E	10432.1	6651.45	6205.05	6287.77	4904.07	4305	4869.61	4975.4	6078.81	-0.634289	0.181997	-3.48517	0.000491829	0.0208507	yes
271	AAEL008118-RA	5570126	protein mab-21	109.164	121.95	108.458	123.886	65.6184	71.3658	86.4921	76.247	95.3975	-0.635332	0.152058	-4.17822	2.94e-05	0.00208022	yes
123	AAEL003743-RA	5578943	V-type proton ATPase 116 kDa subunit a	593.454	415.007	479.718	444.897	357.256	251.427	304.286	325.472	396.44	-0.64033	0.155393	-4.12072	3.78e-05	0.00256382	yes
190	AAEL005964-RA	5567309	actin, indirect flight muscle	214.358	148.419	157.473	148.818	115.744	96.6183	132.343	83.0751	137.106	-0.640711	0.202109	-3.17013	0.00152372	0.0470054	yes
115	AAEL003560-RA	5578493	POU domain protein CF1A	118.095	98.3159	81.3436	82.5904	61.0616	68.072	56.272	58.0387	77.9737	-0.641531	0.192325	-3.33567	0.000850946	0.0317871	yes
161	AAEL004957-RB	5565721	uncharacterized LOC5565721	777.048	724.135	572.534	527.487	467.531	495.169	404.325	298.16	533.298	-0.642291	0.195669	-3.28254	0.00102876	0.0355698	yes
137	AAEL004229-RA	5564405	glutathione S-transferase theta-1	1219.66	1091.87	1116.91	1089.26	911.367	718.05	727.367	531.453	925.742	-0.644025	0.156592	-4.11276	3.91e-05	0.00262786	yes
658	AAEL026217-RA	5566990	myosin heavy chain, muscle	29120.9	19163.1	18745.5	16336.5	14723.1	12314.4	13250	13012.1	17083.2	-0.645295	0.183852	-3.50987	0.000448331	0.0195525	yes
219	AAEL006890-RB	5568474	RNA polymerase II degradation factor 1	1031.1	1262.04	1257.7	1359.62	885.849	731.225	885.763	633.874	1005.9	-0.646043	0.141597	-4.56256	5.05e-06	0.000419758	yes
210	AAEL006605-RA	5568164	uncharacterized LOC5568164	305.659	247.68	309.731	299.974	195.033	199.824	202.162	144.528	238.074	-0.646766	0.138853	-4.65792	3.19e-06	0.000280133	yes
90	AAEL002759-RD	5575993	tropomyosin-1	4456.86	3594.2	3036.83	3046.49	2306.67	2079.49	2195.65	2410.31	2890.81	-0.652351	0.13933	-4.68206	2.84e-06	0.000252195	yes
61	AAEL001899-RA	5572784	uncharacterized LOC5572784	144.89	135.184	132.444	130.119	100.25	97.7162	70.861	73.9709	110.679	-0.657096	0.157514	-4.17167	3.02e-05	0.00210881	yes
290	AAEL008607-RG	5570819	CD109 antigen	130.997	141.802	100.115	159.727	103.896	79.0513	73.9872	80.799	108.797	-0.657673	0.199577	-3.29533	0.000983048	0.0346338	yes
480	AAEL014551-RB	5564668	pancreatic lipase-related protein 2	546.811	465.11	533.947	566.445	357.256	297.54	329.295	352.784	431.149	-0.659628	0.0988666	-6.6719	2.53e-11	4.2e-09	yes
532	AAEL019721-RM	5577684	uncharacterized LOC5577684	223.29	248.626	195.016	163.622	158.578	101.01	121.923	142.252	169.29	-0.661092	0.194397	-3.40073	0.000672064	0.0266256	yes
654	AAEL025977-RM	5564765	titin	92.293	84.1357	105.329	81.032	61.973	70.2679	45.8512	50.0726	73.8694	-0.663426	0.199137	-3.3315	0.000863792	0.0318031	yes
7	AAEL000278-RD	5573757	NAD kinase	1069.81	918.876	833.25	1107.96	806.56	503.952	501.237	658.91	800.069	-0.669169	0.182963	-3.65739	0.000254796	0.0125934	yes
56	AAEL001673-RA	5571832	actin, muscle	4139.29	2472.08	2317.25	2364.73	2080.65	1564.56	1683.99	1751.4	2296.74	-0.673287	0.20976	-3.2098	0.00132828	0.0424759	yes
354	AAEL010545-RC	5573506	protein vestigial	224.282	201.359	264.888	289.845	190.476	159.201	110.46	153.632	199.268	-0.674927	0.1966	-3.43299	0.000596968	0.0243482	yes
173	AAEL005256-RG	5566239	flocculation protein FLO11	119.088	106.824	77.1721	94.2777	58.3275	73.5617	61.4823	55.7627	80.812	-0.675107	0.198191	-3.40635	0.000658381	0.0263275	yes
98	AAEL002892-RA	5576480	serine/threonine-protein kinase D1	483.298	313.855	395.246	278.937	259.74	215.195	213.625	228.741	298.58	-0.678866	0.188966	-3.59252	0.000327493	0.0153839	yes
85	AAEL002417-RF	5574604	troponin T, skeletal muscle	313.598	267.533	236.731	276.6	205.058	133.948	189.657	151.356	221.81	-0.683161	0.164751	-4.14664	3.37e-05	0.00233706	yes
199	AAEL006372-RB	5567927	sodium-independent sulfate anion transporter	975.527	1241.24	1205.55	1216.26	852.128	697.189	500.195	837.579	940.709	-0.684021	0.180145	-3.79707	0.000146419	0.00804278	yes
209	AAEL006582-RH	5568141	calcium-transporting ATPase sarcoplasmic/endoplasmic reticulum type	4517.4	3099.79	2880.4	2369.41	2314.87	2038.87	1755.89	1876.59	2606.65	-0.687822	0.202051	-3.40419	0.000663601	0.0264601	yes
415	AAEL011898-RK	5575522	1-acyl-sn-glycerol-3-phosphate acyltransferase alpha	171.685	155.982	182.502	222.059	111.187	107.598	104.207	130.872	148.261	-0.695399	0.157234	-4.42269	9.75e-06	0.000751659	yes
552	AAEL019939-RF	5577073	supervillin	589.485	456.602	577.748	494.763	342.674	337.066	252.182	372.131	427.831	-0.699692	0.14756	-4.74176	2.12e-06	0.000196789	yes
365	AAEL010850-RO	5574015	troponin I	117.103	203.249	152.258	165.181	80.2003	95.5204	121.923	95.5932	128.878	-0.700528	0.215265	-3.25426	0.00113687	0.0382714	yes
460	AAEL013612-RA	5578300	slit homolog 1 protein	373.142	317.636	339.974	272.704	208.703	185.551	166.732	237.845	262.786	-0.704917	0.150113	-4.6959	2.65e-06	0.000240206	yes
593	AAEL022263-RA	5567119	lysyl oxidase homolog 2B	344.362	276.041	295.131	281.275	192.298	170.18	181.321	187.772	241.048	-0.706946	0.11001	-6.42619	1.31e-10	2.07e-08	yes
523	AAEL019567-RN	5568502	ensconsin	766.131	594.622	534.99	423.081	395.533	294.247	379.315	349.37	467.161	-0.707405	0.193437	-3.65704	0.000255148	0.0125934	yes
602	AAEL022661-RF	5570462	actin-binding LIM protein 2	522.994	553.972	406.718	376.332	343.585	248.133	230.298	312.954	374.373	-0.711108	0.186141	-3.82026	0.000133313	0.00738241	yes
574	AAEL021263-RA	110678272	uncharacterized LOC110678272	120.08	93.5892	126.187	91.9402	75.6435	68.072	64.6086	51.2106	86.4164	-0.72449	0.198021	-3.65865	0.000253544	0.012575	yes
628	AAEL024235-RC	5567636	talin-2	465.435	444.312	458.861	424.639	324.447	225.077	274.065	244.673	357.689	-0.742516	0.122316	-6.07049	1.28e-09	1.74e-07	yes
447	AAEL013059-RA	5577181	uncharacterized LOC5577181	98.2474	82.2451	68.8292	85.707	45.5684	46.1133	62.5244	44.3826	66.7022	-0.755677	0.206424	-3.66081	0.00025142	0.0125354	yes
420	AAEL012101-RB	5575826	tubulin alpha-1A chain	84.3538	69.0102	65.7006	59.9949	50.1252	42.8195	33.3464	37.5545	55.3631	-0.758934	0.224977	-3.37339	0.000742492	0.0286807	yes
166	AAEL005111-RB	5566015	serine-rich adhesin for platelets	310.621	289.276	234.645	192.451	156.755	154.809	166.732	125.182	203.809	-0.763687	0.184626	-4.1364	3.53e-05	0.00242725	yes
287	AAEL008543-RB	5570780	cdc42 homolog	260.008	296.838	361.875	331.92	216.905	195.432	146.932	176.392	248.288	-0.763857	0.159909	-4.77683	1.78e-06	0.000166922	yes
262	AAEL008032-RA	5569934	protein msta	412.838	432.968	336.846	328.803	280.701	162.494	270.939	166.15	298.967	-0.777035	0.220756	-3.51989	0.000431733	0.0190144	yes
80	AAEL002287-RD	5574208	decaprenyl-diphosphate synthase subunit 1	234.206	452.82	525.605	417.627	207.792	239.35	236.551	257.191	321.393	-0.793654	0.236114	-3.36132	0.000775717	0.0296835	yes
91	AAEL002759-RE	5575993	tropomyosin-1	296.727	208.921	235.688	236.863	130.325	86.7369	194.868	147.942	192.259	-0.804424	0.242519	-3.31696	0.000910042	0.0330886	yes
8	AAEL000328-RA	5575162	zinc-type alcohol dehydrogenase-like protein C1773.06c	3508.13	2679.11	3007.63	1732.06	1805.42	1480.02	1858.02	1097.05	2145.93	-0.807755	0.245561	-3.28943	0.0010039	0.0351712	yes
259	AAEL007989-RB	5569902	mucin-5AC	82.3691	97.3706	100.115	78.6946	53.7707	40.6236	58.3561	48.9346	70.0293	-0.822299	0.192233	-4.27762	1.89e-05	0.00139353	yes
74	AAEL002185-RA	5573903	adult cuticle protein 1	1388.37	1224.22	879.136	1235.74	936.885	545.674	648.17	536.005	924.275	-0.825195	0.218426	-3.77791	0.000158151	0.00856554	yes
108	AAEL003203-RC	5577524	acyl-CoA Delta(11) desaturase	4841.91	4011.1	3438.33	3983.82	3122.34	1994.95	2218.57	1837.89	3181.11	-0.826754	0.188196	-4.39305	1.12e-05	0.000858629	yes
165	AAEL005109-RA	5566006	cilia- and flagella-associated protein 44	524.979	306.292	644.491	395.81	307.131	277.778	208.415	256.053	365.119	-0.833258	0.242604	-3.43465	0.000593328	0.0242967	yes
478	AAEL014453-RA	5564471	uncharacterized LOC5564471	157.791	155.037	179.373	130.898	90.2253	83.4431	80.2397	94.4552	121.433	-0.833662	0.150661	-5.53336	3.14e-08	3.69e-06	yes
665	AAEL026867-RC	110681514	nucleolin-like	190.54	334.652	209.616	215.047	102.984	126.263	145.89	157.046	185.255	-0.838279	0.226923	-3.69411	0.000220661	0.0113631	yes
501	AAEL018174-RD	5568595	dual specificity protein phosphatase Mpk3	205.426	178.67	192.93	167.518	92.9594	115.283	122.965	81.937	144.711	-0.847544	0.158705	-5.34036	9.28e-08	1.05e-05	yes
589	AAEL022046-RA	5564635	unconventional myosin-IXa	106.187	109.66	130.358	109.861	49.2138	85.639	72.9452	44.3826	88.5308	-0.855885	0.235369	-3.63636	0.000276519	0.0135177	yes
134	AAEL003991-RD	5563901	reticulon-4-interacting protein 1 homolog, mitochondrial	74.4299	82.2451	100.115	84.1487	48.3025	43.9174	42.725	51.2106	65.8868	-0.87123	0.187117	-4.65606	3.22e-06	0.000281461	yes
486	AAEL015136-RA	5579505	protein NPC2 homolog	89.3158	59.5568	114.715	97.3943	53.7707	45.0153	56.272	39.8305	69.4838	-0.884689	0.257266	-3.43881	0.000584276	0.0239741	yes
37	AAEL001232-RB	5569443	uncharacterized peptidase C1-like protein F26E4.3	290.773	159.763	228.388	215.047	128.503	92.2266	144.848	116.077	171.953	-0.889872	0.221192	-4.02308	5.74e-05	0.00357854	yes
264	AAEL008046-RA	5569951	ammonium transporter Rh type A	118.095	146.529	124.101	123.886	52.8593	84.541	82.3238	56.9007	98.6544	-0.893506	0.198981	-4.4904	7.11e-06	0.000576446	yes
293	AAEL008680-RB	5570952	ubiquitin-related modifier 1 homolog	962.626	843.248	740.435	816.554	596.034	390.865	430.376	384.649	645.598	-0.898228	0.164508	-5.4601	4.76e-08	5.46e-06	yes
110	AAEL003269-RA	5577614	uncharacterized LOC5577614	210.388	294.002	265.931	219.721	150.376	119.675	137.554	113.801	188.931	-0.920032	0.160773	-5.72256	1.05e-08	1.32e-06	yes
366	AAEL010869-RE	5572708	formin-J	282.833	338.434	200.23	164.402	139.439	130.654	134.428	108.111	187.316	-0.941132	0.244675	-3.84645	0.00011984	0.0067834	yes
4	AAEL000126-RB	5567757	molybdenum cofactor biosynthesis protein 1	362.225	190.96	295.131	178.426	129.414	130.654	133.385	135.424	194.453	-0.955115	0.244846	-3.90089	9.58e-05	0.00554786	yes
358	AAEL010691-RB	5573705	ribonucleoside-diphosphate reductase subunit M2	199.472	183.397	160.601	183.101	91.1367	60.3864	96.9129	126.32	137.666	-0.95694	0.212406	-4.50523	6.63e-06	0.000540659	yes
634	AAEL024632-RI	5564460	neuronal calcium sensor 2	49.6199	45.3766	41.7146	39.7369	32.8092	18.6649	19.7994	18.2082	33.2412	-0.962676	0.297115	-3.24008	0.00119497	0.0397297	yes
642	AAEL025130-RA	5576541	rho guanine nucleotide exchange factor 10	232.221	244.844	238.816	174.531	143.996	106.5	121.923	81.937	168.096	-0.963551	0.20048	-4.80621	1.54e-06	0.000144843	yes
521	AAEL019503-RB	5571245	protein phosphatase 1 regulatory subunit 16A	231.229	142.747	214.83	132.456	103.896	54.8968	96.9129	112.663	136.204	-0.966452	0.285154	-3.38922	0.00070091	0.0274375	yes
533	AAEL019726-RP	5574086	collagen alpha-1(XVIII) chain	153.822	123.84	119.93	136.352	104.807	54.8968	45.8512	58.0387	99.6922	-1.01159	0.275122	-3.67687	0.000236115	0.0120019	yes
407	AAEL011737-RB	5575275	uncharacterized LOC5575275	81.3767	56.7207	60.4862	66.2281	38.2774	18.6649	41.6829	29.5884	49.1282	-1.03923	0.290751	-3.57429	0.00035118	0.0162721	yes
20	AAEL000729-RE	5566288	RNA-binding protein Musashi homolog Rbp6	654.983	588.005	523.519	220.501	309.865	236.056	224.046	187.772	368.093	-1.05118	0.323368	-3.25071	0.00115116	0.038562	yes
289	AAEL008574-RC	5570810	probable peroxisomal acyl-coenzyme A oxidase 1	206.419	114.387	114.715	173.751	42.8343	84.541	78.1555	88.7651	112.946	-1.05511	0.303989	-3.4709	0.000518711	0.0218094	yes
520	AAEL019485-RD	5571230	serine/threonine-protein phosphatase 2B catalytic subunit 3	308.636	271.314	212.745	221.28	127.591	143.83	102.123	113.801	187.665	-1.0559	0.174744	-6.04254	1.52e-09	2.05e-07	yes
623	AAEL023680-RA	110674063	protein glass	59.5439	87.9171	89.6865	49.8659	22.7842	28.5463	41.6829	44.3826	53.0512	-1.06515	0.329381	-3.23379	0.00122161	0.0402011	yes
239	AAEL007449-RF	5569187	protein Gawky	258.024	138.966	142.873	200.243	90.2253	133.948	58.3561	66.0048	136.08	-1.08686	0.322282	-3.3724	0.000745168	0.0287297	yes
135	AAEL004009-RA	5563958	glucose dehydrogenase [FAD, quinone]	39.6959	43.4859	57.3576	33.5036	16.4046	28.5463	19.7994	17.0702	31.983	-1.08777	0.328032	-3.31605	0.000912994	0.0331037	yes
109	AAEL003235-RB	5577601	larval cuticle protein LCP-30	1533.26	2081.65	2380.86	2723.92	1049.89	1066.1	1079.59	899.031	1601.79	-1.09066	0.176304	-6.18627	6.16e-10	8.74e-08	yes
436	AAEL012720-RA	5576701	uncharacterized LOC5576701	118.095	81.2997	81.3436	73.2405	47.3911	40.6236	40.6409	35.2784	64.7391	-1.10213	0.235176	-4.68642	2.78e-06	0.000249172	yes
298	AAEL008760-RA	5571027	transmembrane protein 164	137.943	105.879	105.329	84.1487	53.7707	68.072	57.3141	21.6223	79.2599	-1.10554	0.338594	-3.2651	0.00109427	0.0370816	yes
481	AAEL014578-RD	5571867	E3 ubiquitin-protein ligase MARCH6	272.91	190.96	186.673	119.99	74.7321	81.2472	119.838	73.9709	140.04	-1.13742	0.286203	-3.97417	7.06e-05	0.00429513	yes
534	AAEL019758-RG	5569285	interferon regulatory factor 2-binding protein 2	119.088	278.877	212.745	183.101	139.439	72.4637	85.45	60.3148	143.935	-1.14607	0.338593	-3.38479	0.000712319	0.0278308	yes
250	AAEL007765-RA	5569575	serine protease inhibitor 42Dd	395.967	257.134	250.288	240.759	110.275	162.494	144.848	97.8692	207.454	-1.15	0.232919	-4.93734	7.92e-07	7.86e-05	yes
245	AAEL007631-RC	5569422	serine/threonine-protein phosphatase 4 regulatory subunit 1	65.4983	57.6661	83.4293	48.3076	30.9865	32.9381	16.6732	33.0024	46.0627	-1.16231	0.309542	-3.75491	0.000173401	0.00929992	yes
553	AAEL019941-RB	110677843	uncharacterized LOC110677843	45.6503	28.3604	37.5432	35.0619	11.8478	14.2732	19.7994	18.2082	26.343	-1.1983	0.333284	-3.59542	0.000323871	0.015284	yes
612	AAEL023148-RG	5572167	filamin-A	351.309	300.62	260.717	310.883	135.794	80.1493	130.259	179.806	218.692	-1.2186	0.228232	-5.33929	9.33e-08	1.05e-05	yes
428	AAEL012421-RA	5576270	DE-cadherin	94.2778	74.6823	50.0576	52.9825	30.0751	21.9587	36.4726	27.3123	48.4774	-1.22697	0.312901	-3.92127	8.81e-05	0.00515726	yes
555	AAEL019950-RB	5575585	disintegrin and metalloproteinase domain-containing protein 10	83.3614	54.83	102.201	55.32	24.6069	45.0153	27.0939	28.4504	52.6099	-1.24041	0.331879	-3.73754	0.000185827	0.00986284	yes
341	AAEL010102-RD	5572896	tetraspanin-9	71.4527	73.7369	123.058	64.6698	51.9479	21.9587	29.1781	36.4165	59.0523	-1.24512	0.349693	-3.5606	0.000370004	0.0168765	yes
96	AAEL002879-RH	5576362	heterogeneous nuclear ribonucleoprotein R	236.191	528.448	207.53	220.501	87.4912	84.541	196.952	126.32	210.997	-1.26822	0.392114	-3.23431	0.00121936	0.0402011	yes
76	AAEL002231-RA	5573924	adult cuticle protein 1	48.6275	50.1033	37.5432	57.6574	22.7842	19.7628	14.589	22.7603	34.2285	-1.28415	0.290349	-4.42277	9.74e-06	0.000751659	yes
319	AAEL009189-RB	5571599	protein encore	191.533	109.66	113.672	104.407	64.7071	38.4277	70.861	36.4165	91.2105	-1.29704	0.318761	-4.06901	4.72e-05	0.00306128	yes
630	AAEL024497-RB	5567111	cytosolic purine 5'-nucleotidase	142.905	84.1357	81.3436	98.1734	39.1888	46.1133	57.3141	18.2082	70.9228	-1.33511	0.35986	-3.71007	0.000207203	0.0108564	yes
100	AAEL002995-RC	5580264	nicotinamidase	177.639	190.014	207.53	164.402	82.9344	47.2112	89.6183	69.4189	128.596	-1.34818	0.200847	-6.71248	1.91e-11	3.29e-09	yes
392	AAEL011359-RE	5574714	nuclear factor of activated T-cells 5	73.4375	47.2673	57.3576	45.1909	30.9865	12.0773	16.6732	25.0363	38.5033	-1.38573	0.361695	-3.8312	0.00012752	0.00713902	yes
632	AAEL024560-RB	5569282	dendritic arbor reduction protein 1	131.989	62.3928	104.287	186.997	27.341	29.6443	54.1878	73.9709	83.8512	-1.39667	0.439695	-3.17645	0.0014909	0.0462994	yes
506	AAEL018273-RD	5564200	glycerophosphocholine phosphodiesterase GPCPD1	226.267	207.031	167.901	167.518	68.3525	74.6596	68.7769	72.8329	131.667	-1.43344	0.161953	-8.85097	8.68e-19	2.22e-16	yes
202	AAEL006485-RE	5568044	probable uridine nucleosidase 1	86.3386	87.9171	31.286	63.1115	20.0501	26.3504	12.5049	38.6925	45.7814	-1.46728	0.461874	-3.1768	0.0014891	0.0462994	yes
19	AAEL000719-RD	5565906	rho guanine nucleotide exchange factor 7	181.609	115.332	117.844	75.578	59.2389	49.4071	32.3043	33.0024	83.0394	-1.4883	0.338933	-4.39114	1.13e-05	0.000862948	yes
378	AAEL011140-RC	5574423	secreted 45 kDa protein	155.807	101.152	248.202	125.444	20.0501	81.2472	65.6506	37.5545	104.388	-1.62656	0.4558	-3.56859	0.000358908	0.0165179	yes
84	AAEL002417-RE	5574604	troponin T, skeletal muscle	64.5059	31.1964	55.2719	37.3994	20.9614	7.68555	12.5049	17.0702	30.8245	-1.68183	0.426912	-3.93953	8.16e-05	0.00487794	yes
193	AAEL006137-RA	5567548	uncharacterized LOC5567548	19.848	12.2895	15.643	10.129	3.64547	5.48968	2.08415	3.41404	9.06785	-1.98115	0.605078	-3.2742	0.0010596	0.0361468	yes
518	AAEL019474-RC	5565883	CUGBP Elav-like family member 2	54.5819	22.6883	30.2431	45.9701	10.025	0	8.33659	9.10412	22.6186	-2.47434	0.683171	-3.62185	0.000292502	0.0140967	yes
644	AAEL025250-RG	5576740	leucine-rich repeat-containing protein 24	41.6807	17.0162	47.9718	21.0372	3.64547	12.0773	3.12622	0	18.3194	-2.76023	0.839516	-3.28788	0.00100946	0.0352603	yes
301	AAEL008832-RD	5571132	uncharacterized LOC5571132	110.156	254.298	165.816	213.488	24.6069	0	31.2622	53.4867	106.639	-2.76702	0.791599	-3.49548	0.000473202	0.0203566	yes
22	AAEL000874-RC	5567237	uncharacterized LOC5567237	75.4223	33.0871	26.0717	28.0496	0.911367	4.39174	11.4628	6.82809	23.2781	-2.7968	0.704022	-3.97261	7.11e-05	0.00431059	yes
677	AAEL027602-RA	5574417	cell wall protein DAN4	23.8176	15.1255	14.6001	3.11662	0	0	0	2.27603	7.36698	-4.74139	1.39649	-3.39522	0.000685745	0.0269471	yes
273	AAEL008138-RC	5570171	ATP-binding cassette sub-family G member 1	17.8632	40.6499	26.0717	30.387	0	0	4.16829	0	14.8925	-4.78623	1.0177	-4.70299	2.56e-06	0.000234928	yes
393	AAEL011387-RC	5574750	protein halfway	36.7187	34.9778	12.5144	34.2828	0	0	4.16829	0	15.3327	-4.82981	1.09174	-4.42396	9.69e-06	0.000751659	yes
510	AAEL018306-RAA	5578934	calcium-activated potassium channel slowpoke	40.6883	35.9231	0	38.1786	0	2.19587	0	1.13801	14.7655	-5.14489	1.59475	-3.22615	0.00125467	0.0409552	yes
609	AAEL023104-RC	110677676	uncharacterized LOC110677676	4.96199	10.3988	17.7287	15.5831	0	0	0	0	6.08408	-5.98727	1.3257	-4.51631	6.29e-06	0.000518485	yes
577	AAEL021519-RA	5574820	microprocessor complex subunit DGCR8	8.93158	11.3441	12.5144	17.1414	0	0	0	0	6.24144	-6.0277	1.21441	-4.96347	6.92e-07	7e-05	yes
605	AAEL022734-RE	5574622	ATP-binding cassette sub-family G member 8	10.9164	21.7429	4.17146	27.2704	0	0	0	0	8.01265	-6.38792	1.42394	-4.48607	7.25e-06	0.000585945	yes
493	AAEL017280-RD	23687700	trithorax group protein osa	14.886	16.0709	28.1574	10.9082	0	0	0	0	8.7528	-6.50566	1.22678	-5.30305	1.14e-07	1.26e-05	yes
641	AAEL025051-RB	5572662	nuclear receptor-binding protein homolog	21.8328	0	22.9431	25.7121	0	0	0	0	8.81099	-6.52048	2.05754	-3.16907	0.00152926	0.0470054	yes
418	AAEL012041-RG	5575729	sodium-independent sulfate anion transporter	0	23.6336	33.3717	14.8039	0	0	0	0	8.97616	-6.54662	2.07468	-3.15549	0.00160231	0.0484343	yes
666	AAEL026903-RB	5567265	uncharacterized LOC5567265	0	29.3057	15.643	31.1662	0	0	0	0	9.51436	-6.63208	2.06593	-3.21022	0.00132634	0.0424759	yes
258	AAEL007971-RJ	5569869	P protein	0	23.6336	38.586	14.0248	0	0	0	0	9.53056	-6.63293	2.08484	-3.18151	0.00146509	0.0457763	yes
129	AAEL003918-RB	5563715	peripheral plasma membrane protein CASK	22.8252	26.4697	22.9431	10.129	0	0	0	0	10.2959	-6.74078	1.21002	-5.5708	2.54e-08	3.03e-06	yes
538	AAEL019804-RF	23687582	muscarinic acetylcholine receptor M3	29.7719	9.45345	26.0717	17.1414	0	0	0	0	10.3048	-6.74367	1.24669	-5.40925	6.33e-08	7.18e-06	yes
255	AAEL007929-RB	5566068	uncharacterized serine-rich protein C215.13	31.7567	29.3057	21.9002	0	0	0	0	0	10.3703	-6.75425	2.08155	-3.24481	0.00117528	0.0391771	yes
474	AAEL014303-RI	5564085	uncharacterized LOC5564085	19.848	0	47.9718	16.3622	0	0	0	0	10.5228	-6.77554	2.09987	-3.22664	0.00125251	0.04095	yes
265	AAEL008055-RG	5569979	neuronal acetylcholine receptor subunit alpha-7	21.8328	42.5405	20.8573	0	0	0	0	0	10.6538	-6.79338	2.1006	-3.23401	0.00122065	0.0402011	yes
458	AAEL013565-RB	5578225	calcium uniporter protein, mitochondrial	43.6655	16.0709	26.0717	0	0	0	0	0	10.726	-6.80278	2.11212	-3.22083	0.00127819	0.0412614	yes
512	AAEL018313-RI	5577336	tight junction protein ZO-1	47.6351	22.6883	15.643	0	0	0	0	0	10.7458	-6.80565	2.12534	-3.20214	0.00136409	0.0432823	yes
591	AAEL022076-RC	5564334	putative epidermal cell surface receptor	30.7643	19.8523	23.9859	11.6873	0	0	0	0	10.7862	-6.80765	1.2018	-5.66453	1.47e-08	1.81e-06	yes
590	AAEL022046-RB	5564635	unconventional myosin-IXa	21.8328	31.1964	34.4146	0	0	0	0	0	10.9305	-6.83007	2.07929	-3.28481	0.00102052	0.0354359	yes
662	AAEL026791-RA	5568108	probable nucleoporin Nup54	49.6199	23.6336	14.6001	0	0	0	0	0	10.9817	-6.83703	2.13115	-3.20814	0.00133594	0.0426365	yes
545	AAEL019855-RK	5564725	serine/threonine-protein kinase 10	25.8024	49.158	0	16.3622	0	0	0	0	11.4153	-6.89406	2.06913	-3.33187	0.000862658	0.0318031	yes
489	AAEL015394-RG	5579463	probable G-protein coupled receptor 158	49.6199	1.89069	34.4146	6.23323	0	0	0	0	11.5198	-6.90506	1.70447	-4.05115	5.1e-05	0.00324436	yes
280	AAEL008354-RL	5570466	gamma-aminobutyric acid receptor subunit beta	28.7795	39.7045	0	24.1538	0	0	0	0	11.5797	-6.91496	2.02677	-3.41181	0.000645331	0.0260093	yes
625	AAEL023902-RJ	5574500	nuclear receptor coactivator 2	0	27.415	47.9718	21.8163	0	0	0	0	12.1504	-6.98356	2.04796	-3.41001	0.0006496	0.0260784	yes
529	AAEL019682-RI	5571120	protein muscleblind	20.8404	0	64.6577	13.2456	0	0	0	0	12.343	-7.00557	2.13496	-3.28136	0.00103307	0.0356584	yes
223	AAEL006978-RD	5568609	annulin	7.93919	33.0871	50.0576	10.129	0	0	0	0	12.6516	-7.03981	1.42576	-4.9376	7.91e-07	7.86e-05	yes
279	AAEL008354-RE	5570466	gamma-aminobutyric acid receptor subunit beta	0	17.9616	33.3717	49.8659	0	0	0	0	12.6499	-7.04281	2.05749	-3.42301	0.000619316	0.0251592	yes
226	AAEL007004-RD	5568657	protein bride of sevenless	14.886	23.6336	64.6577	0	0	0	0	0	12.8972	-7.06872	2.14151	-3.3008	0.000964085	0.0341423	yes
150	AAEL004592-RD	5565105	tyrosine-protein kinase Src64B	26.7948	40.6499	39.6289	64.6698	0.911367	0	0	0	21.5818	-7.0878	1.125	-6.30027	2.97e-10	4.5e-08	yes
687	AAEL029014-RB	5572154	apolipoprotein D	52.5971	41.5952	5.21433	10.129	0	0	0	0	13.692	-7.15545	1.50631	-4.75031	2.03e-06	0.000189509	yes
646	AAEL025404-RB	5578658	neuropathy target esterase sws	46.6427	44.4312	0	18.6997	0	0	0	0	13.7217	-7.15938	2.0375	-3.5138	0.00044174	0.0193702	yes
77	AAEL002235-RG	5573936	SUN domain-containing ossification factor	31.7567	7.56276	70.9149	0	0	0	0	0	13.7793	-7.1642	2.20049	-3.25573	0.00113101	0.0381372	yes
503	AAEL018251-RC	5577102	mitogen-activated protein kinase kinase kinase 11	40.6883	60.5021	15.643	0	0	0	0	0	14.6042	-7.24872	2.1038	-3.44554	0.000569926	0.0234796	yes
682	AAEL027868-RI	5571159	adenylate cyclase type 2	32.7491	0	68.8292	16.3622	0	0	0	0	14.7426	-7.26205	2.08437	-3.48404	0.000493901	0.0208952	yes
300	AAEL008832-RC	5571132	uncharacterized LOC5571132	10.9164	60.5021	46.929	0	0	0	0	0	14.7934	-7.26713	2.13833	-3.39851	0.000677543	0.0267276	yes
535	AAEL019776-RD	5574095	uncharacterized LOC5574095	56.5667	43.4859	19.8145	0	0	0	0	0	14.9834	-7.28556	2.07679	-3.50808	0.000451351	0.0196232	yes
680	AAEL027790-RI	5579824	microtubule-associated protein futsch	60.5363	28.3604	31.286	0	0	0	0	0	15.0228	-7.28918	2.06285	-3.53354	0.000410031	0.0182143	yes
143	AAEL004410-RD	5564728	serine-rich adhesin for platelets	33.7415	57.6661	0	35.8411	0	0	0	0	15.9061	-7.37291	1.99592	-3.69398	0.000220768	0.0113631	yes
30	AAEL001041-RQ	5579878	guanine nucleotide-binding protein subunit beta-1	19.848	16.0709	60.4862	31.9453	0	0	0	0	16.0438	-7.38347	1.2595	-5.86221	4.57e-09	5.8e-07	yes
638	AAEL024921-RF	110675820	vesicle-associated membrane protein 2	24.81	13.2348	90.7294	0	0	0	0	0	16.0968	-7.38857	2.16391	-3.41446	0.000639091	0.0258087	yes
558	AAEL020112-RG	5572530	protein I'm not dead yet	40.6883	0	20.8573	67.7864	0	0	0	0	16.1665	-7.39663	2.04706	-3.6133	0.000302325	0.0144993	yes
25	AAEL000949-RB	5567490	macoilin-2	20.8404	62.3928	47.9718	0	0	0	0	0	16.4006	-7.41593	2.0672	-3.58743	0.000333948	0.0155797	yes
584	AAEL021793-RD	5566586	E3 ubiquitin-protein ligase SH3RF1	67.4831	49.158	0	31.1662	0	0	0	0	18.4759	-7.58863	1.98307	-3.82671	0.00012987	0.00723094	yes
431	AAEL012513-RU	5576419	calcium-binding protein E63-1	21.8328	44.4312	19.8145	72.4613	0	0	0	0	19.8175	-7.69339	1.24704	-6.16932	6.86e-10	9.6e-08	yes
33	AAEL001142-RF	5568568	protein sprint	72.4451	62.3928	0	30.387	0	0	0	0	20.6531	-7.74928	1.97362	-3.92643	8.62e-05	0.00506255	yes
530	AAEL019700-RG	5579206	protein phosphatase PP2A 55 kDa regulatory subunit	34.7339	60.5021	53.1862	24.1538	0	0	0	0	21.572	-7.80943	1.14876	-6.79815	1.06e-11	1.88e-09	yes
53	AAEL001593-RB	5571293	glycerol-3-phosphate dehydrogenase [NAD(+)], cytoplasmic	9.92398	67.1195	18.7716	88.0444	0	0	0	0	22.9824	-7.90555	1.4046	-5.62834	1.82e-08	2.2e-06	yes
531	AAEL019711-RD	5572902	1-phosphatidylinositol 4,5-bisphosphate phosphodiesterase classes I and II	95.2702	0	52.1433	45.9701	0	0	0	0	24.173	-7.97609	1.95824	-4.0731	4.64e-05	0.00304816	yes
260	AAEL007996-RD	5569893	arf-GAP with dual PH domain-containing protein 1	95.2702	0	73.0006	27.2704	0	0	0	0	24.4427	-7.99183	1.98754	-4.02097	5.8e-05	0.00359984	yes
619	AAEL023441-RA	5579438	calcium release-activated calcium channel protein 1	0	90.7532	29.2003	76.3571	0	0	0	0	24.5388	-7.99841	1.97309	-4.05374	5.04e-05	0.00321869	yes
525	AAEL019606-RA	5566381	leucine-rich repeats and immunoglobulin-like domains protein 3	70.4603	0	90.7294	70.1239	0	0	0	0	28.9142	-8.23457	1.91281	-4.30496	1.67e-05	0.0012501	yes
167	AAEL005147-RC	5566047	DNA-binding protein D-ETS-4	127.027	15.1255	0	91.161	0	0	0	0	29.1642	-8.24734	2.02709	-4.06856	4.73e-05	0.00306128	yes
551	AAEL019939-RD	5577073	supervillin	113.133	106.824	36.5003	21.0372	0	0	0	0	34.6869	-8.49635	1.27099	-6.68484	2.31e-11	3.87e-09	yes
429	AAEL012424-RD	5576272	tubulin alpha-8 chain	151.837	73.7369	0	52.9825	0	0	0	0	34.8195	-8.50277	1.91429	-4.44174	8.92e-06	0.000698614	yes
495	AAEL017363-RB	23687783	DNA-directed RNA polymerase II subunit RPB1	217.335	435.804	0	179.985	0	0	2.08415	0	104.401	-8.61616	2.34431	-3.67535	0.000237524	0.0120271	yes
611	AAEL023148-RE	5572167	filamin-A	130.004	99.2613	0	90.3819	0	0	0	0	39.9559	-8.70145	1.86282	-4.67111	3e-06	0.000263863	yes
27	AAEL000994-RA	5567847	uncharacterized LOC5567847	138.936	101.152	0	109.082	0	0	0	0	43.6462	-8.82876	2.6221	-3.36706	0.000759752	0.0292368	yes
613	AAEL023148-RI	5572167	filamin-A	200.464	103.988	18.7716	29.6079	0	0	0	0	44.104	-8.84333	1.3755	-6.42916	1.28e-10	2.05e-08	yes
335	AAEL009851-RD	5572510	DNA polymerase zeta catalytic subunit	88.3234	168.271	157.473	0	0	0	0	0	51.7585	-9.07449	2.72051	-3.33559	0.000851197	0.0317871	yes
