# Supplementary material for: Transcriptomics analysis of ethanol treatment of male Aedes aegypti reveals a small set of putative radioprotective genes
Source: Front Physiol. 2023 Jan 30;14:1120408. doi: 10.3389/fphys.2023.1120408 (PMC9922702; doi:10.3389/fphys.2023.1120408)
Supplement: Supplementary file 5 [file Table6.XLSX]

## Sheet: allSig_deSeqRes_ETOHx_by_H2Ox
	Row.names	EntrezGene ID	Name	EtOHxray1	EtOHxray2	EtOHxray3	EtOHxray4	H2Oxray1	H2Oxray2	H2Oxray3	H2Oxray4	baseMean	log2FoldChange	lfcSE	stat	pvalue	padj	significant
52	AAEL019500-RC	5579293	uncharacterized LOC5579293	34.4625	368.04	0	0	0	0	0	0	50.3128	-23.4499	3.38413	-6.92937	4.23e-12	3.41e-08	yes
33	AAEL009851-RD	5572510	DNA polymerase zeta catalytic subunit	40.4797	287.308	259.448	120.883	0	0	0	0	88.5148	-9.84964	1.22567	-8.03611	9.27e-16	2.25e-11	yes
47	AAEL017391-RB	23687811	CREB-binding protein	240.143	24.9317	0	20.1471	0	0	0	0	35.6528	-8.54239	2.12679	-4.01658	5.9e-05	0.0264992	yes
69	AAEL027150-RB	5570306	1-phosphatidylinositol 4,5-bisphosphate phosphodiesterase epsilon-1	36.6506	56.9868	141.188	47.3457	0	0	0	0	35.2714	-8.5197	1.20054	-7.09654	1.28e-12	1.55e-08	yes
54	AAEL019700-RG	5579206	protein phosphatase PP2A 55 kDa regulatory subunit	103.387	89.0418	84.4714	0	0	0	0	0	34.6126	-8.49784	1.90982	-4.44956	8.6e-06	0.00613293	yes
34	AAEL009895-RI	5572559	endothelin-converting enzyme homolog	0	68.859	80.8512	99.7281	0	0	0	0	31.1798	-8.3458	2.0103	-4.15152	3.3e-05	0.0178704	yes
71	AAEL028101-RD	110679566	protein couch potato	19.1458	22.5573	59.1299	132.971	0	0	0	0	29.2255	-8.25187	1.35385	-6.09512	1.09e-09	2.94e-06	yes
32	AAEL009430-RE	5571946	protein split ends	35.5565	0	126.707	53.3898	0	0	0	0	26.9567	-8.13632	1.9797	-4.10988	3.96e-05	0.0194511	yes
55	AAEL019833-RAS	5566385	zinc finger protein 420	0	42.7401	118.26	54.3971	0	0	0	0	26.9246	-8.13376	2.06572	-3.9375	8.23e-05	0.0350038	yes
61	AAEL023441-RA	5579438	calcium release-activated calcium channel protein 1	43.2148	113.974	30.1683	27.1986	0	0	0	0	26.8194	-8.12691	1.25348	-6.48347	8.96e-11	3.62e-07	yes
44	AAEL015118-RC	5573995	la-related protein CG11505	14.7696	99.7269	50.6828	19.1397	0	0	0	0	23.0399	-7.90501	1.36118	-5.80745	6.34e-09	1.18e-05	yes
31	AAEL009428-RK	5571941	ralBP1-associated Eps domain-containing protein 1	19.1458	43.9273	18.101	81.5957	0	0	0	0	20.3462	-7.7289	1.2963	-5.96227	2.49e-09	5.88e-06	yes
19	AAEL006973-RA	5568606	uncharacterized LOC5568606	26.2571	0	38.6155	92.6766	0	0	0	0	19.6937	-7.68409	2.01904	-3.80581	0.00014134	0.0494216	yes
38	AAEL013565-RB	5578225	calcium uniporter protein, mitochondrial	50.8732	34.4295	0	56.4119	0	0	0	0	17.7143	-7.53269	1.97091	-3.82193	0.000132409	0.0486161	yes
27	AAEL008894-RD	5571211	uncharacterized LOC5571211	29.5393	27.3062	28.9616	55.4045	0	0	0	0	17.6514	-7.52592	1.13671	-6.62081	3.57e-11	1.75e-07	yes
46	AAEL017280-RD	23687700	trithorax group protein osa	22.975	23.7445	20.5145	31.228	0	0	0	0	12.3077	-7.00618	1.11065	-6.30817	2.82e-10	9.77e-07	yes
41	AAEL013896-RD	5578896	mothers against decapentaplegic homolog 4	25.7101	34.4295	19.3077	15.1103	0	0	0	0	11.8197	-6.94741	1.16748	-5.95078	2.67e-09	5.88e-06	yes
68	AAEL026903-RB	5567265	uncharacterized LOC5567265	21.3339	20.1828	13.2741	30.2206	0	0	0	0	10.6264	-6.79817	1.16707	-5.82501	5.71e-09	1.15e-05	yes
58	AAEL022076-RC	5564334	putative epidermal cell surface receptor	17.5047	10.685	13.2741	34.2501	0	0	0	0	9.46424	-6.63018	1.26577	-5.23807	1.62e-07	0.000231306	yes
65	AAEL024944-RB	110678567	uncharacterized LOC110678567	4.37619	32.0551	12.0673	18.1324	0	0	0	0	8.32887	-6.43222	1.42343	-4.51884	6.22e-06	0.00538153	yes
37	AAEL012427-RC	5576268	uncharacterized LOC5576268	9.84642	22.5573	4.82693	22.1618	0	0	0	0	7.42405	-6.27312	1.37394	-4.5658	4.98e-06	0.00446596	yes
57	AAEL021955-RG	5575427	syntaxin-16	12.5815	17.8084	9.65387	6.04413	0	0	0	0	5.76099	-5.90972	1.27544	-4.63346	3.6e-06	0.00335169	yes
63	AAEL024264-RB	110677913	major facilitator superfamily domain-containing protein 10	5.47023	8.31057	9.65387	8.05884	0	0	0	0	3.93669	-5.34394	1.24528	-4.29134	1.78e-05	0.0113255	yes
12	AAEL004913-RJ	5565647	ADP-ribosylation factor 6	10.9405	5.93612	6.03367	7.05148	0	0	0	0	3.74522	-5.31196	1.27765	-4.15759	3.22e-05	0.0178704	yes
50	AAEL019420-RE	5576935	protein transport protein Sec16A	3.82916	9.4978	7.2404	5.03677	0	0	0	0	3.20052	-5.03946	1.32633	-3.79956	0.000144953	0.0494739	yes
29	AAEL009232-RJ	5571706	long-chain-fatty-acid--CoA ligase 6	227.562	72.4207	86.8848	141.03	15.4545	0	2.07056	0	68.1777	-4.87959	1.02676	-4.75241	2.01e-06	0.00211532	yes
53	AAEL019553-RA	5566516	YEATS domain-containing protein 2	24.069	52.2379	71.1973	68.5001	0	6.59469	0	3.40902	28.251	-4.47148	0.883072	-5.06355	4.12e-07	0.00052486	yes
2	AAEL000246-RE	5572042	protocadherin-like wing polarity protein stan	22.975	16.6211	32.5818	27.1986	4.54545	3.29735	6.21168	0	14.1789	-2.7918	0.626511	-4.4561	8.35e-06	0.00612893	yes
60	AAEL023332-RC	5574074	venom dipeptidyl peptidase 4	50.3262	48.6762	30.1683	42.3089	9.99998	20.8832	10.3528	18.1814	28.8621	-1.55272	0.370691	-4.18871	2.81e-05	0.0165814	yes
48	AAEL018273-RD	5564200	glycerophosphocholine phosphodiesterase GPCPD1	269.136	250.504	98.9522	146.066	68.1817	74.7398	68.3285	72.7257	131.079	-1.43418	0.321713	-4.45795	8.27e-06	0.00612893	yes
64	AAEL024560-RB	5569282	dendritic arbor reduction protein 1	153.714	97.3524	98.9522	143.044	27.2727	29.6761	53.8346	73.8621	84.7135	-1.42721	0.359372	-3.97139	7.15e-05	0.0314822	yes
8	AAEL003287-RA	5577779	serrate RNA effector molecule homolog	76.0363	49.8634	53.0963	53.3898	32.7272	28.577	24.8467	21.5905	42.5159	-1.12175	0.273149	-4.10671	4.01e-05	0.0194511	yes
24	AAEL007765-RA	5569575	serine protease inhibitor 42Dd	307.427	233.883	236.52	304.221	110	162.669	143.904	97.7252	199.544	-1.07849	0.192437	-5.60441	2.09e-08	3.62e-05	yes
51	AAEL019485-RD	5571230	serine/threonine-protein phosphatase 2B catalytic subunit 3	229.203	148.403	277.549	243.78	127.273	143.984	101.457	113.634	173.16	-0.88708	0.212798	-4.16864	3.06e-05	0.01768	yes
15	AAEL006071-RH	5577246	tyrosine-protein phosphatase 99A	149.884	129.407	170.149	126.927	84.5453	100.019	98.3517	61.3623	115.081	-0.741919	0.188907	-3.92744	8.59e-05	0.0358711	yes
56	AAEL021809-RA	110680419	short-chain specific acyl-CoA dehydrogenase, mitochondrial-like	119.798	110.412	127.914	141.03	55.4544	67.046	89.0341	88.6345	99.9153	-0.738983	0.191277	-3.86342	0.00011181	0.0423357	yes
16	AAEL006185-RB	5567577	exocyst complex component 4	171.765	150.778	143.601	177.294	86.3635	104.416	77.646	129.543	130.176	-0.70349	0.181409	-3.87792	0.000105351	0.0418522	yes
10	AAEL003560-RA	5578493	POU domain protein CF1A	102.84	85.4802	94.1252	94.6913	60.909	68.1451	55.9051	57.9533	77.5062	-0.64715	0.159385	-4.06029	4.9e-05	0.023288	yes
30	AAEL009371-RF	5571875	formin-like protein CG32138	186.535	226.76	217.212	205.5	120	170.363	122.163	145.451	174.248	-0.580555	0.143818	-4.03674	5.42e-05	0.025072	yes
59	AAEL022819-RC	5578293	clathrin heavy chain	1113.19	966.401	1180.19	1131.26	895.453	761.687	847.895	723.848	952.49	-0.442636	0.0952534	-4.64693	3.37e-06	0.00326572	yes
1	AAEL000102-RB	5567769	phytanoyl-CoA dioxygenase domain-containing protein 1	2838.5	2992.99	3471.77	2516.37	2408.18	2220.21	2221.71	2078.37	2593.51	-0.403789	0.104446	-3.86601	0.000110631	0.0423357	yes
25	AAEL008374-RC	5570553	E3 ubiquitin-protein ligase Nedd-4	404.797	438.086	381.328	416.037	275.454	349.519	320.937	329.538	364.462	-0.365849	0.0933577	-3.91879	8.9e-05	0.035944	yes
21	AAEL007206-RA	5568900	rhythmically expressed gene 5 protein	503.262	501.009	476.66	477.486	410.908	407.772	416.183	372.719	445.75	-0.286103	0.0666553	-4.29227	1.77e-05	0.0113255	yes
28	AAEL009092-RA	5571461	ceramide synthase 6	750.516	737.266	739.728	687.016	626.363	597.919	615.992	622.714	672.189	-0.244442	0.0559746	-4.36701	1.26e-05	0.00847882	yes
42	AAEL014039-RC	5579199	uncharacterized LOC5579199	3224.7	3567.61	3396.96	3552.94	3846.36	4023.86	3955.81	3805.6	3671.73	0.187534	0.0464884	4.034	5.48e-05	0.025072	yes
35	AAEL009964-RA	5572696	ATP synthase subunit e, mitochondrial	2814.44	2854.09	2938.4	3082.51	3475.45	3299.54	3457.84	3145.39	3133.46	0.195914	0.0513475	3.81545	0.000135935	0.0491659	yes
3	AAEL000886-RA	5567196	uncharacterized LOC5567196	1487.36	1714.35	1601.34	1592.63	1909.09	2177.35	2299.36	1821.55	1825.38	0.361083	0.0912736	3.95605	7.62e-05	0.0329736	yes
40	AAEL013774-RA	5578590	uncharacterized LOC5578590	607.196	478.452	565.958	636.648	805.453	753.993	801.307	703.394	669.05	0.418177	0.100755	4.15043	3.32e-05	0.0178704	yes
6	AAEL002361-RA	5574351	uncharacterized LOC5574351	246.708	178.084	196.698	201.471	279.09	285.77	276.42	297.721	245.245	0.451492	0.118528	3.80917	0.000139432	0.0494216	yes
43	AAEL014215-RB	5565689	nicotinate phosphoribosyltransferase	336.966	364.478	270.308	310.265	482.726	440.745	411.006	553.397	396.237	0.555713	0.129781	4.28193	1.85e-05	0.0115123	yes
18	AAEL006786-RF	5579951	ras-like GTP-binding protein RhoL	124.174	148.403	117.053	146.066	181.818	196.742	192.562	230.677	167.187	0.584267	0.129702	4.50468	6.65e-06	0.00541782	yes
45	AAEL015404-RB	5579458	lysozyme c-1	503.809	580.553	438.044	518.788	660.908	845.22	820.977	740.893	638.649	0.587258	0.114835	5.11394	3.16e-07	0.000424761	yes
9	AAEL003466-RC	5578219	cullin-4A	89.1648	97.3524	84.4714	53.3898	131.818	126.398	177.033	139.77	112.425	0.824998	0.214359	3.84867	0.000118763	0.0442766	yes
5	AAEL002091-RA	5573568	ubiquitin thioesterase trabid	59.0785	58.174	57.9232	76.5589	136.363	128.596	97.3164	118.179	91.5238	0.935524	0.178483	5.24152	1.59e-07	0.000231306	yes
13	AAEL005131-RB	5566057	protein kinase C-binding protein NELL2	25.7101	28.4934	16.8943	29.2133	65.4544	56.0549	47.6229	72.7257	42.7711	1.2603	0.26566	4.74404	2.09e-06	0.00211532	yes
22	AAEL007452-RJ	5569178	uncharacterized LOC5569178	39.9327	39.1784	22.9279	52.3824	84.5453	107.713	116.987	69.3167	66.6229	1.28439	0.290153	4.42659	9.57e-06	0.00662831	yes
23	AAEL007576-RA	5569390	small integral membrane protein 4	42.6678	77.1696	25.3414	43.3162	79.0908	181.354	256.75	188.632	111.79	1.9067	0.424237	4.49443	6.98e-06	0.00545299	yes
17	AAEL006620-RB	5568169	uncharacterized LOC5568169	0	0	0	0	5.45454	7.69381	7.24696	6.81804	3.40167	5.29107	1.25318	4.2221	2.42e-05	0.0146629	yes
67	AAEL026782-RC	5577902	DENN domain-containing protein 1A	0	0	1.20673	0	12.7273	29.6761	17.5998	5.6817	8.36145	5.8399	1.29695	4.50278	6.71e-06	0.00541782	yes
70	AAEL027346-RB	5567760	TSC22 domain family protein 1	0	0	0	0	7.27271	12.0903	11.3881	21.5905	6.54269	6.2323	1.26929	4.91008	9.1e-07	0.0011031	yes
62	AAEL023706-RC	5567190	ral guanine nucleotide dissociation stimulator-like 1	0	0	0	0	9.09089	19.7841	14.4939	12.4997	6.98358	6.32831	1.20755	5.2406	1.6e-07	0.000231306	yes
66	AAEL026170-RM	110678810	mitogen-activated protein kinase kinase kinase 7-interacting protein 3 homolog	0	0	0	0	10.9091	18.685	6.21168	21.5905	7.17452	6.367	1.3008	4.89468	9.85e-07	0.00113626	yes
11	AAEL004913-RI	5565647	ADP-ribosylation factor 6	0	0	0	0	26.3636	12.0903	5.1764	31.8175	9.43097	6.76544	1.39635	4.84509	1.27e-06	0.00139401	yes
49	AAEL018341-RO	5566523	tyrosine-protein kinase receptor torso	0	0	0	0	32.7272	0	61.0816	40.9082	16.8396	7.60185	1.99873	3.80334	0.00014276	0.0494216	yes
20	AAEL007129-RF	5568775	zwei Ig domain protein zig-8	0	0	0	0	40.909	16.4867	44.5171	46.5899	18.5628	7.74296	1.1697	6.61963	3.6e-11	1.75e-07	yes
14	AAEL005950-RG	5567294	chloride channel protein 2	0	0	0	0	56.3635	63.7487	19.6703	18.1814	19.7455	7.83257	1.26044	6.21417	5.16e-10	1.56e-06	yes
7	AAEL002684-RD	5575667	dachshund homolog 2	0	0	0	0	37.2727	0	26.9173	96.5889	20.0974	7.85659	2.03299	3.86455	0.000111292	0.0423357	yes
36	AAEL011436-RB	5574835	myosin-VIIa	0	0	0	0	91.818	35.1717	35.1995	0	20.2737	7.87028	2.00721	3.92101	8.82e-05	0.035944	yes
39	AAEL013565-RF	5578225	calcium uniporter protein, mitochondrial	0	0	0	0	69.0908	0	61.0816	54.5443	23.0896	8.05741	1.94712	4.13811	3.5e-05	0.0181748	yes
4	AAEL001803-RC	5572437	chondroitin sulfate proteoglycan 4	0	0	0	0	0	61.5505	54.8699	81.8164	24.7796	8.15845	1.97226	4.13659	3.53e-05	0.0181748	yes
26	AAEL008641-RM	5570867	G protein alpha o subunit	0	0	0	0	59.9999	28.577	123.198	0	26.4719	8.25466	1.99992	4.1275	3.67e-05	0.0185142	yes
