# Supplementary material for: Transcriptomics analysis of ethanol treatment of male Aedes aegypti reveals a small set of putative radioprotective genes
Source: Front Physiol. 2023 Jan 30;14:1120408. doi: 10.3389/fphys.2023.1120408 (PMC9922702; doi:10.3389/fphys.2023.1120408)
Supplement: Supplementary file 7 [file Table4.XLSX]

## Sheet: allSig_deSeqRes_ETOHc_by_ETOHx
	Row.names	EntrezGene IDs	Name	EtOHcontrol1	EtOHcontrol2	EtOHcontrol3	EtOHcontrol4	EtOHxray1	EtOHxray2	EtOHxray3	EtOHxray4	baseMean	log2FoldChange	lfcSE	stat	pvalue	padj	significant
737	AAEL019500-RC	5579293	uncharacterized LOC5579293	0	0	0	0	36.9387	393.089	0	0	53.7535	22.9201	3.38412	6.77283	1.26e-11	1.84e-09	yes
172	AAEL003777-RG	5578996	autophagy-related protein 2 homolog A	0	0	0	0	209.319	498.335	658.118	417.689	222.933	11.2833	1.0897	10.3546	3.99e-25	1.12e-22	yes
277	AAEL006120-RB	5567507	G protein-coupled receptor kinase 2	0	0	0	0	78.5681	167.38	68.3926	82.8918	49.654	9.11569	1.11042	8.2092	2.23e-16	4.18e-14	yes
366	AAEL007765-RE	5569575	serine protease inhibitor 42Dd	0	0	0	0	63.9099	65.9375	205.178	0	41.8782	8.87257	1.96096	4.52461	6.05e-06	0.000376488	yes
854	AAEL023676-RB	5579155	roquin-1	0	0	0	0	147.169	0	73.5543	108.728	41.1814	8.85006	1.89258	4.6762	2.92e-06	0.000194865	yes
232	AAEL004900-RD	5565667	geranylgeranyl pyrophosphate synthase	0	0	0	0	50.4243	126.803	27.099	32.2955	29.5777	8.36954	1.26266	6.6285	3.39e-11	4.62e-09	yes
662	AAEL014226-RJ	5579527	uncharacterized LOC5579527	0	0	0	0	11.7266	39.3089	143.237	0	24.2841	8.08538	2.15183	3.75745	0.000171656	0.00670463	yes
877	AAEL025030-RA	5564068	uncharacterized LOC5564068	0	0	0	0	73.8774	19.0204	49.0362	35.5251	22.1824	7.96472	1.20544	6.60731	3.91e-11	5.3e-09	yes
447	AAEL009428-RK	5571941	ralBP1-associated Eps domain-containing protein 1	0	0	0	0	20.5215	46.9171	19.3564	87.1979	21.7491	7.9258	1.29143	6.13722	8.4e-10	1.02e-07	yes
788	AAEL019986-RF	5577287	uncharacterized LOC5577287	0	0	0	0	11.1402	0	54.1979	101.193	20.8163	7.86408	2.10142	3.74227	0.000182363	0.00700772	yes
899	AAEL026470-RA	110677013	DNA repair protein complementing XP-G cells homolog	0	0	0	0	30.4891	0	27.099	91.504	18.6365	7.70564	2.03538	3.78584	0.000153188	0.00610582	yes
401	AAEL008556-RD	5570788	serine/threonine-protein kinase PRP4 homolog	0	0	0	0	46.9063	72.2777	0	27.9894	18.3967	7.68701	1.99118	3.86053	0.000113139	0.00471135	yes
495	AAEL010543-RB	5573495	cyclin-Y-like protein 1	0	0	0	0	35.1797	0	69.6831	41.9842	18.3559	7.68316	1.97918	3.882	0.000103601	0.00436511	yes
935	AAEL028037-RI	5565300	trafficking kinesin-binding protein milt	0	0	0	0	0	31.7007	69.6831	35.5251	17.1136	7.5799	2.11484	3.58416	0.000338171	0.0116827	yes
810	AAEL021318-RC	110674772	amyloid beta A4 precursor protein-binding family A member 2-like	0	0	0	0	36.9387	77.3498	0	21.5303	16.9774	7.57065	2.03053	3.7284	0.000192696	0.00732665	yes
194	AAEL004083-RI	5564140	echinoderm microtubule-associated protein-like 2	0	0	0	0	26.3848	0	73.5543	30.1425	16.2602	7.50769	2.02429	3.7088	0.000208243	0.00786109	yes
772	AAEL019833-RAQ	5566385	zinc finger protein 420	0	0	0	0	17.5899	0	46.4554	54.9024	14.8685	7.37872	2.03242	3.63051	0.000282863	0.0100238	yes
813	AAEL021556-RE	5568484	F-actin-methionine sulfoxide oxidase Mical	0	0	0	0	21.6942	0	49.0362	45.2137	14.493	7.342	2.00975	3.6532	0.00025899	0.00936391	yes
886	AAEL025569-RC	5578696	phosphofurin acidic cluster sorting protein 2	0	0	0	0	35.7661	50.7212	0	27.9894	14.3096	7.32482	1.99201	3.67711	0.000235895	0.00873028	yes
777	AAEL019855-RM	5564725	serine/threonine-protein kinase 10	0	0	0	0	9.96759	32.9688	69.6831	0	14.0774	7.29788	2.14276	3.40583	0.00065964	0.0195553	yes
733	AAEL019443-RH	5571255	potassium voltage-gated channel subfamily H member 6	0	0	0	0	22.2805	22.8245	65.8118	0	13.8646	7.27694	2.0795	3.49937	0.000466363	0.0150559	yes
830	AAEL022328-RD	5571572	breast carcinoma-amplified sequence 3 homolog	0	0	0	0	10.5539	82.4219	14.1947	0	13.3963	7.22667	2.21564	3.26167	0.00110758	0.0295083	yes
489	AAEL010408-RE	5573320	gamma-aminobutyric acid type B receptor subunit 2	0	0	0	0	11.1402	0	41.2937	39.8311	11.5331	7.01163	2.07777	3.3746	0.000739232	0.0214397	yes
189	AAEL003999-RB	110678723	uncharacterized LOC110678723	0	0	0	0	23.4532	0	45.1649	15.0712	10.4612	6.87206	2.05913	3.33737	0.000845763	0.0239771	yes
865	AAEL024486-RB	5566034	uncharacterized LOC5566034	0	0	0	0	22.8668	15.2164	30.9702	5.38259	9.3045	6.70327	1.35118	4.96106	7.01e-07	5.58e-05	yes
312	AAEL006723-RC	5568305	uncharacterized LOC5568305	0	0	0	0	32.8344	24.0926	15.4851	0	9.05151	6.66556	2.06972	3.22051	0.00127965	0.0329598	yes
873	AAEL024944-RB	110678567	uncharacterized LOC110678567	0	0	0	0	4.69063	34.2368	12.9043	19.3773	8.90112	6.62853	1.41242	4.69302	2.69e-06	0.00018234	yes
560	AAEL011703-RF	5575243	NAD kinase 2, mitochondrial	0	0	0	0	35.1797	0	19.3564	12.9182	8.43179	6.56563	2.06669	3.17688	0.0014887	0.0370513	yes
755	AAEL019683-RM	5570551	extracellular sulfatase SULF-1 homolog	0	0	0	0	15.8309	0	16.7755	24.7599	7.17079	6.32892	2.0327	3.11356	0.00184847	0.0438631	yes
740	AAEL019521-RJ	5566555	cation-independent mannose-6-phosphate receptor	0	0	0	0	13.4856	12.6803	16.7755	12.9182	6.98245	6.28527	1.15043	5.4634	4.67e-08	4.65e-06	yes
913	AAEL027091-RO	5575816	folate transporter 1	0	0	0	0	4.1043	32.9688	5.16171	12.9182	6.89412	6.26095	1.54932	4.0411	5.32e-05	0.00250269	yes
901	AAEL026487-RB	5578399	mismatch repair endonuclease PMS2	0	0	0	0	21.1078	0	12.9043	20.4538	6.80824	6.25648	2.03824	3.06955	0.00214385	0.0490769	yes
121	AAEL002684-RK	5575667	dachshund homolog 2	0	0	0	2.75247	34.0071	57.0613	36.132	59.2084	23.6452	6.01675	0.946426	6.35734	2.05e-10	2.65e-08	yes
353	AAEL007560-RC	5569374	glycoprotein-N-acetylgalactosamine 3-beta-galactosyltransferase 1	0	0	0	0	5.27696	17.7524	5.16171	18.3008	5.81148	6.01532	1.40577	4.27903	1.88e-05	0.00104087	yes
168	AAEL003739-RC	5578845	coiled-coil domain-containing protein 102A	0	1.5613	0	0	7.03595	49.4531	18.066	25.8364	12.7441	5.73744	1.32744	4.3222	1.54e-05	0.000885419	yes
484	AAEL010294-RI	5573102	MAGUK p55 subfamily member 7	2.41645	0	0	0	34.5934	29.1647	14.1947	11.8417	11.5264	5.52406	1.22122	4.5234	6.09e-06	0.000377547	yes
744	AAEL019553-RA	5566516	YEATS domain-containing protein 2	0	0	9.24646	0	25.7985	55.7933	76.1352	73.2032	30.0221	4.65853	1.27865	3.64331	0.000269155	0.00960166	yes
798	AAEL020779-RA	110677274	uncharacterized LOC110677274	2.41645	0.780649	2.05477	0.917491	29.9028	13.9483	41.2937	34.4485	15.7203	4.35338	0.766576	5.679	1.35e-08	1.45e-06	yes
640	AAEL013565-RD	5578225	calcium uniporter protein, mitochondrial	7.24936	0	0	0	19.9352	32.9688	54.1979	30.1425	18.0617	4.34515	1.27144	3.41751	0.000631971	0.0190249	yes
538	AAEL011254-RD	5574618	aprataxin and PNK-like factor	33.8303	34.3485	32.8763	24.7723	636.167	556.665	423.26	522.111	283.004	4.09311	0.195522	20.9343	2.61e-97	5.58e-94	yes
541	AAEL011254-RG	5574618	aprataxin and PNK-like factor	0	5.46454	0	0	15.8309	21.5565	34.8415	12.9182	11.3265	3.84625	1.23088	3.12481	0.0017792	0.0424471	yes
539	AAEL011254-RE	5574618	aprataxin and PNK-like factor	9.66581	16.3936	0	15.5973	214.596	171.184	83.8777	87.1979	74.8141	3.72819	0.693656	5.3747	7.67e-08	7.23e-06	yes
165	AAEL003726-RA	5578868	uncharacterized LOC5578868	22.9563	28.1034	24.6572	28.4422	360.006	323.347	371.643	278.818	179.747	3.66693	0.186089	19.7052	1.94e-86	2.45e-83	yes
540	AAEL011254-RF	5574618	aprataxin and PNK-like factor	120.823	111.633	109.93	106.429	1623.54	1392.3	894.266	1638.46	749.673	3.63062	0.200946	18.0676	5.73e-73	6.13e-70	yes
767	AAEL019807-RA	5568064	uncharacterized LOC5568064	48.329	64.7938	68.8348	48.627	646.134	543.985	514.88	709.425	330.626	3.38359	0.17083	19.8067	2.6e-87	3.72e-84	yes
663	AAEL014250-RA	5563946	replication protein A 32 kDa subunit	53.1619	63.2325	78.0812	47.7095	628.545	588.366	560.045	605.003	328.018	3.29922	0.127979	25.7793	1.51e-146	6.48e-143	yes
162	AAEL003684-RA	5578760	X-ray repair cross-complementing protein 5	115.99	116.317	117.122	122.944	1304.58	1066.41	1125.25	1045.3	626.74	3.26801	0.111097	29.4157	3.45e-190	1.85e-186	yes
565	AAEL011801-RA	5575396	uncharacterized LOC5575396	2.41645	10.1484	15.4108	4.58745	81.4997	73.5457	72.2639	88.2744	43.5184	3.25288	0.407216	7.98809	1.37e-15	2.47e-13	yes
922	AAEL027493-RA	5567655	uncharacterized LOC5567655	35.0386	39.8131	34.9311	30.2772	280.852	314.471	305.831	310.037	168.906	3.09857	0.148236	20.903	5.03e-97	9.79e-94	yes
557	AAEL011649-RB	5575094	helicase POLQ-like	8.45758	34.3485	35.9585	27.5247	214.01	248.534	236.148	226.069	128.881	3.09333	0.288483	10.7228	7.96e-27	2.33e-24	yes
340	AAEL007291-RA	5569011	uncharacterized LOC5569011	70.0771	71.8197	58.5609	66.0593	551.736	583.293	619.405	495.198	314.519	3.07164	0.126669	24.2493	6.72e-130	2.4e-126	yes
502	AAEL010644-RA	5573651	ribonucleoside-diphosphate reductase large subunit	53.1619	122.562	99.6563	78.9042	865.422	741.797	680.055	685.741	415.912	3.05804	0.220094	13.8942	6.87e-44	3.58e-41	yes
482	AAEL010253-RA	5573062	origin recognition complex subunit 6	3.62468	0.780649	4.10954	3.66996	28.7301	15.2164	18.066	30.1425	13.0425	2.98417	0.627192	4.75799	1.96e-06	0.000139507	yes
858	AAEL023973-RA	110675157	serine/threonine-protein phosphatase 6 regulatory ankyrin repeat subunit A-like	3.62468	4.68389	2.05477	4.58745	25.7985	21.5565	33.5511	35.5251	16.4227	2.93066	0.503208	5.82396	5.75e-09	6.41e-07	yes
598	AAEL012508-RB	5576415	muscle M-line assembly protein unc-89	77.3265	85.8713	103.766	77.9867	720.012	637.819	547.141	709.425	369.918	2.92466	0.141459	20.675	5.82e-95	1.04e-91	yes
710	AAEL018118-RA	5567894	transcription termination factor 2	37.455	61.6712	68.8348	59.6369	440.333	403.233	421.97	429.53	240.333	2.87895	0.130355	22.0854	4.37e-108	1.17e-104	yes
902	AAEL026512-RA	110676738	uncharacterized LOC110676738	0	1.5613	2.05477	0.917491	7.62228	6.34015	12.9043	7.53562	4.86698	2.84849	0.875109	3.25501	0.0011339	0.0298892	yes
600	AAEL012545-RA	5580247	proliferating cell nuclear antigen	50.7455	49.9615	50.3418	59.6369	413.362	365.192	371.643	346.639	213.44	2.83372	0.133499	21.2265	5.43e-100	1.29e-96	yes
657	AAEL014055-RA	5579214	deoxynucleoside kinase	210.231	231.853	246.572	248.64	1764.85	1531.78	1751.11	1597.55	947.823	2.82368	0.084247	33.5166	2.76e-246	2.95e-242	yes
390	AAEL008178-RA	5570235	probable DNA helicase MCM9	22.9563	29.6646	28.7668	29.3597	204.629	173.72	198.726	212.074	112.487	2.82322	0.174561	16.1733	7.78e-59	6.17e-56	yes
548	AAEL011424-RA	5574772	histone H3.3	12.0823	23.4195	21.5751	24.7723	150.687	140.751	134.204	152.865	82.5446	2.79181	0.20575	13.569	6.12e-42	2.98e-39	yes
925	AAEL027697-RA	110677041	uncharacterized LOC110677041	3.62468	0.780649	0	0.917491	9.38126	7.60818	10.3234	6.4591	4.88685	2.77941	0.894706	3.10651	0.00189313	0.0447246	yes
564	AAEL011772-RA	5575369	DNA repair protein RAD50	3.62468	0.780649	6.16431	9.17491	52.7696	20.2885	41.2937	19.3773	19.1842	2.77854	0.714449	3.88907	0.00010063	0.00424829	yes
504	AAEL010691-RA	5573705	ribonucleoside-diphosphate reductase subunit M2	176.401	253.711	124.314	240.383	1538.53	1100.65	1407.86	1386.55	778.549	2.76961	0.219931	12.5931	2.31e-36	9.31e-34	yes
537	AAEL011254-RB	5574618	aprataxin and PNK-like factor	76.1182	120.22	123.286	247.723	1133.37	957.362	789.741	948.412	549.529	2.75189	0.315382	8.72558	2.65e-18	5.5e-16	yes
242	AAEL005071-RD	5565953	GTP-binding protein 2	24.1645	5.46454	0	11.9274	53.3559	63.4015	94.2012	64.591	39.6383	2.74597	0.790044	3.47572	0.000509478	0.0161553	yes
843	AAEL023255-RA	110680439	ribonucleoside-diphosphate reductase large subunit-like	61.6195	46.8389	94.5194	51.3795	484.308	352.512	367.772	461.826	240.097	2.72266	0.231707	11.7504	7.03e-32	2.31e-29	yes
259	AAEL005539-RA	5566660	Fanconi anemia group I protein	45.9126	54.6454	74.9991	28.4422	423.916	303.059	299.379	306.807	192.145	2.71251	0.269465	10.0663	7.79e-24	2.06e-21	yes
658	AAEL014055-RB	5579214	deoxynucleoside kinase	42.2879	26.5421	14.3834	11.0099	131.338	150.895	134.204	178.702	86.1703	2.67433	0.377207	7.0898	1.34e-12	2.07e-10	yes
409	AAEL008692-RA	5570960	barrier-to-autointegration factor	361.26	361.44	305.133	350.482	2308.38	2172.13	2096.94	2123.97	1259.97	2.65893	0.0693466	38.3426	0	0	yes
514	AAEL010913-RB	5574080	structural maintenance of chromosomes protein 5	95.4498	129.588	130.478	113.769	851.936	712.632	655.537	683.588	421.622	2.6254	0.134864	19.467	2.09e-84	2.49e-81	yes
841	AAEL023096-RA	5574869	Fanconi anemia group D2 protein homolog	33.8303	32.0066	31.8489	35.7821	232.773	191.472	179.369	205.615	117.837	2.61307	0.174915	14.939	1.84e-50	1.12e-47	yes
544	AAEL011314-RA	5574682	juvenile hormone epoxide hydrolase 1	357.635	449.654	472.597	484.435	3089.37	2295.13	2504.72	2872.15	1565.71	2.60739	0.130925	19.9151	3.01e-88	4.6e-85	yes
850	AAEL023601-RA	5563642	double-strand break repair protein MRE11	51.9537	74.9423	105.821	89.9141	559.358	443.81	414.227	459.673	274.962	2.538	0.199707	12.7086	5.3e-37	2.22e-34	yes
536	AAEL011254-RA	5574618	aprataxin and PNK-like factor	247.686	174.085	366.776	176.158	1418.33	1401.17	1231.07	1401.63	802.112	2.50181	0.231007	10.83	2.48e-27	7.38e-25	yes
117	AAEL002581-RA	5575302	structural maintenance of chromosomes protein 6	74.91	110.071	122.259	80.7392	635.581	532.572	495.524	537.182	323.605	2.50057	0.166517	15.0169	5.69e-51	3.58e-48	yes
566	AAEL011815-RA	5575412	poly [ADP-ribose] polymerase	198.149	200.627	244.518	207.353	1213.11	1123.47	1209.13	1113.12	688.685	2.45629	0.0814534	30.1557	9.03e-200	6.44e-196	yes
869	AAEL024736-RA	5570160	DNA-dependent protein kinase catalytic subunit	132.905	134.272	159.245	135.789	852.522	584.561	692.959	782.628	434.36	2.37774	0.143687	16.5481	1.65e-61	1.42e-58	yes
729	AAEL019404-RB	110678329	X-ray repair cross-complementing protein 6	45.9126	81.9681	42.1228	49.5445	283.783	275.162	298.089	287.43	170.502	2.36161	0.201812	11.702	1.24e-31	4.04e-29	yes
385	AAEL008101-RB	5570125	uncharacterized LOC5570125	24.1645	35.9098	39.0406	45.8745	208.733	202.885	166.465	166.86	111.242	2.35023	0.197735	11.8857	1.4e-32	4.85e-30	yes
696	AAEL015216-RB	5579466	nucleosomal histone kinase 1	117.198	75.7229	28.7668	67.8943	368.801	394.357	407.775	287.43	218.493	2.33634	0.344548	6.78087	1.19e-11	1.75e-09	yes
811	AAEL021495-RA	23687785	DNA ligase 4	137.738	151.446	134.587	118.356	741.706	696.148	651.666	626.533	407.272	2.32543	0.105193	22.1063	2.75e-108	8.4e-105	yes
276	AAEL006080-RA	5567402	DNA repair protein RAD51 homolog 1	38.6632	39.8131	46.2323	30.2772	216.942	162.308	200.016	190.544	115.599	2.3238	0.180488	12.8751	6.22e-38	2.66e-35	yes
690	AAEL014945-RB	5565705	aprataxin-like protein	28.9974	22.6388	23.6298	29.3597	122.543	135.679	109.686	148.559	77.6367	2.3125	0.205885	11.232	2.84e-29	8.81e-27	yes
90	AAEL001950-RB	5572989	NEDD8 ultimate buster 1	148.612	154.568	198.285	177.993	914.673	798.858	878.781	761.098	504.109	2.30486	0.112872	20.4202	1.11e-92	1.82e-89	yes
607	AAEL012826-RA	5576838	replication protein A 70 kDa DNA-binding subunit	287.558	297.427	335.955	284.422	1737.88	1498.81	1299.46	1355.34	887.106	2.29165	0.116092	19.74	9.78e-87	1.31e-83	yes
672	AAEL014377-RA	110679411	nibrin-like	82.1594	51.5228	67.8074	70.6468	386.391	324.615	299.379	296.042	197.32	2.2842	0.168441	13.5609	6.83e-42	3.25e-39	yes
177	AAEL003893-RA	5579175	DNA repair protein complementing XP-C cells homolog	83.3676	104.607	95.5468	77.0692	509.52	400.697	352.287	439.219	257.789	2.23936	0.161135	13.8974	6.57e-44	3.52e-41	yes
667	AAEL014348-RB	5564196	caspase	14.4987	17.9549	19.5203	15.5973	59.8056	62.1334	100.653	99.0396	48.6504	2.23644	0.31497	7.10048	1.24e-12	1.96e-10	yes
386	AAEL008105-RC	5570136	glutamate--cysteine ligase	39.8715	96.0198	66.78	88.9966	420.398	309.399	259.376	368.169	206.126	2.20965	0.271938	8.12557	4.45e-16	8.15e-14	yes
105	AAEL002273-RB	5574105	serine protease snake	4.8329	2.34195	5.13692	5.50495	25.2121	12.6803	19.3564	20.4538	11.9399	2.17306	0.534441	4.06604	4.78e-05	0.00228466	yes
171	AAEL003748-RA	5578920	cytochrome P450 9e2	8.45758	7.80649	10.2738	3.66996	38.1114	38.0409	27.099	30.1425	20.4502	2.16645	0.409277	5.29337	1.2e-07	1.08e-05	yes
419	AAEL008960-RA	5571306	regulator of telomere elongation helicase 1 homolog	86.9923	96.8004	120.204	75.2343	501.898	408.305	349.706	385.393	253.067	2.12239	0.177735	11.9413	7.21e-33	2.53e-30	yes
900	AAEL026470-RB	110677013	DNA repair protein complementing XP-G cells homolog	108.74	124.123	128.423	92.6666	564.635	471.707	472.296	458.596	302.648	2.11883	0.131726	16.0851	3.25e-58	2.48e-55	yes
728	AAEL019404-RA	110678329	X-ray repair cross-complementing protein 6	95.4498	69.4777	104.793	70.6468	367.628	314.471	381.966	389.699	224.267	2.10904	0.15635	13.4892	1.81e-41	8.29e-39	yes
74	AAEL001580-RA	5571282	otefin	68.8689	50.7422	71.9169	62.3894	280.852	275.162	237.439	275.588	165.37	2.09494	0.139088	15.062	2.88e-51	1.87e-48	yes
248	AAEL005245-RB	5566192	DNA repair protein RAD50	57.9948	94.4585	89.3824	82.5742	385.804	314.471	356.158	321.879	212.84	2.07629	0.151709	13.686	1.23e-42	6.13e-40	yes
938	AAEL029014-RB	5572154	apolipoprotein D	17.9549	28.7668	24.7723	0	0	0	0	8.93674	-6.59227	2.03003	-3.24738	0.00116475	0.0305143	yes
22	AAEL000550-RA	5563667	ATPase WRNIP1	109.949	93.6778	114.04	122.026	453.819	526.232	360.029	423.071	275.355	2.00786	0.149876	13.3968	6.31e-41	2.81e-38	yes
612	AAEL012906-RB	5576949	acyl-CoA synthetase family member 4 homolog	9.66581	11.7097	11.3012	5.50495	35.7661	32.9688	40.0032	45.2137	24.0167	2.00605	0.358186	5.60058	2.14e-08	2.22e-06	yes
453	AAEL009632-RB	5572214	estradiol 17-beta-dehydrogenase 11	13.2905	6.24519	6.16431	11.0099	30.4891	40.5769	46.4554	25.8364	22.5085	1.97824	0.422577	4.68136	2.85e-06	0.000191215	yes
556	AAEL011626-RB	5575088	DNA cross-link repair 1A protein	38.6632	53.8648	88.3551	67.8943	242.154	271.358	205.178	251.905	152.422	1.9603	0.228643	8.57364	1e-17	2.02e-15	yes
181	AAEL003935-RA	5563778	neurofilament heavy polypeptide	125.655	126.465	132.533	106.429	522.419	491.995	455.521	420.918	297.742	1.95126	0.115377	16.912	3.67e-64	3.41e-61	yes
125	AAEL002782-RB	5576096	DNA repair protein XRCC1	184.859	193.601	160.272	169.736	747.569	689.808	645.213	606.079	424.642	1.92591	0.104864	18.3659	2.46e-75	2.78e-72	yes
423	AAEL009123-RA	5571541	cytochrome P450 6d3	125.655	161.594	238.353	138.541	761.641	635.283	600.048	486.586	393.463	1.90354	0.223226	8.52742	1.5e-17	2.99e-15	yes
697	AAEL015216-RC	5579466	nucleosomal histone kinase 1	18.1234	14.0517	16.4382	24.7723	70.9458	58.3293	59.3596	81.8153	42.9794	1.89363	0.279923	6.76482	1.33e-11	1.93e-09	yes
174	AAEL003864-RA	5579115	uncharacterized LOC5579115	228.355	191.259	242.463	124.779	897.083	668.251	669.732	622.227	455.519	1.86523	0.216302	8.62328	6.51e-18	1.33e-15	yes
169	AAEL003740-RA	5578869	uncharacterized LOC5578869	39.8715	40.5937	28.7668	30.2772	141.305	120.463	122.591	118.417	80.2856	1.85733	0.187129	9.92541	3.23e-23	8.32e-21	yes
910	AAEL026833-RA	110675611	uncharacterized LOC110675611	559.409	588.609	640.061	615.636	2548.77	1766.36	2290.51	1640.61	1331.25	1.7792	0.150945	11.787	4.55e-32	1.52e-29	yes
350	AAEL007541-RA	5569337	DNA polymerase delta small subunit	71.2853	73.381	66.78	92.6666	257.398	296.719	234.858	255.135	168.528	1.77351	0.140263	12.6442	1.2e-36	4.96e-34	yes
669	AAEL014348-RD	5564196	caspase	24.1645	24.2001	23.6298	43.1221	127.233	79.8858	91.6203	89.3509	62.9009	1.7589	0.290607	6.05252	1.43e-09	1.66e-07	yes
318	AAEL006886-RB	5568476	growth arrest and DNA damage-inducible protein GADD45 alpha	124.447	99.1424	86.3003	73.3993	341.243	295.451	298.089	345.562	207.954	1.75236	0.158984	11.0223	2.98e-28	9.13e-26	yes
309	AAEL006625-RA	5568190	ribosome maturation protein SBDS	414.421	296.646	296.914	274.33	1029.59	1049.93	1078.8	1036.69	684.665	1.71556	0.124865	13.7393	5.91e-43	3.01e-40	yes
225	AAEL004743-RN	5565387	multidrug resistance-associated protein 1	8.45758	14.8323	20.5477	11.9274	34.0071	40.5769	64.5213	45.2137	30.0105	1.70143	0.383302	4.43888	9.04e-06	0.000546747	yes
783	AAEL019939-RT	5577073	supervillin	22.9563	44.497	61.6431	33.9472	164.758	90.0301	139.366	135.641	86.6049	1.69883	0.323129	5.25743	1.46e-07	1.3e-05	yes
853	AAEL023664-RA	5564682	uncharacterized LOC5564682	14.4987	17.1743	28.7668	17.4323	64.4962	55.7933	72.2639	58.1319	41.0697	1.68799	0.277177	6.08994	1.13e-09	1.34e-07	yes
855	AAEL023692-RA	110676855	glutathione S-transferase epsilon 2	115.99	156.13	118.149	138.541	427.434	384.213	467.135	430.607	279.775	1.68059	0.119866	14.0206	1.17e-44	6.4e-42	yes
380	AAEL007951-RB	110676856	glutathione S-transferase epsilon 2	115.99	156.13	118.149	138.541	427.434	384.213	467.135	430.607	279.775	1.68059	0.119866	14.0206	1.17e-44	6.4e-42	yes
55	AAEL001300-RA	5569797	histone PARylation factor 1-like	144.987	147.543	145.889	106.429	420.398	436.202	409.065	470.438	285.119	1.67354	0.117419	14.2527	4.32e-46	2.5e-43	yes
629	AAEL013205-RA	5577460	DNA excision repair protein haywire	222.314	213.898	233.216	247.723	788.026	751.941	627.147	723.419	475.961	1.66087	0.0987368	16.8212	1.71e-63	1.52e-60	yes
203	AAEL004317-RA	5564549	terminal uridylyltransferase Tailor	519.537	543.331	693.485	608.296	2070.91	1858.93	1718.85	1790.25	1225.45	1.65461	0.107623	15.3742	2.44e-53	1.63e-50	yes
890	AAEL026008-RA	110675610	uncharacterized LOC110675610	1064.45	1134.28	1198.96	1101.91	4084.37	3266.44	3971.93	2761.27	2322.95	1.64642	0.131885	12.4838	9.16e-36	3.56e-33	yes
399	AAEL008482-RA	5570677	structure-specific endonuclease subunit SLX4	90.6169	92.1165	124.314	102.759	376.423	317.007	250.343	330.491	210.509	1.64398	0.16782	9.79608	1.17e-22	2.88e-20	yes
593	AAEL012265-RA	5576034	RNA polymerase I-specific transcription initiation factor RRN3	93.0334	167.839	127.396	87.1616	388.15	381.677	406.484	306.807	244.819	1.63431	0.218764	7.47066	7.98e-14	1.3e-11	yes
326	AAEL006992-RA	5568652	probable cytochrome P450 28a5	88.2005	96.8004	94.5194	87.1616	272.643	295.451	281.313	296.042	189.016	1.63377	0.106059	15.4044	1.53e-53	1.06e-50	yes
805	AAEL021135-RA	110681316	uncharacterized LOC110681316	22.9563	30.4453	21.5751	17.4323	70.3595	51.9892	70.9735	89.3509	46.8853	1.60679	0.285887	5.62038	1.91e-08	2.01e-06	yes
313	AAEL006754-RB	5568315	uncharacterized LOC5568315	25.3727	56.2067	39.0406	44.0396	138.96	107.782	117.429	135.641	83.059	1.58495	0.238069	6.65753	2.78e-11	3.87e-09	yes
549	AAEL011425-RA	5574782	FACT complex subunit Ssrp1	340.72	344.266	380.132	277.082	1131.61	1020.76	852.972	981.784	666.167	1.57419	0.125091	12.5844	2.57e-36	1.02e-33	yes
826	AAEL021953-RA	5571977	uncharacterized LOC5571977	114.781	103.826	133.56	118.356	365.283	319.543	347.125	345.562	231.005	1.56176	0.106252	14.6986	6.58e-49	3.91e-46	yes
531	AAEL011200-RA	5574528	uncharacterized LOC5574528	108.74	90.5552	84.2455	86.2441	265.607	247.266	233.567	327.261	180.436	1.54659	0.152429	10.1463	3.44e-24	9.32e-22	yes
336	AAEL007238-RA	5568939	uncharacterized LOC5568939	43.4961	59.3293	79.1086	73.3993	210.492	133.143	202.597	189.467	123.879	1.52597	0.228599	6.67531	2.47e-11	3.45e-09	yes
587	AAEL012187-RC	5575936	lethal(3)malignant brain tumor-like protein 3	14.4987	20.2969	45.2049	66.9768	99.0896	139.483	105.815	76.4327	70.9747	1.51244	0.474669	3.1863	0.00144103	0.0360325	yes
695	AAEL015216-RA	5579466	nucleosomal histone kinase 1	27.7892	74.9423	138.697	110.099	300.2	232.049	172.917	282.047	167.343	1.48866	0.419973	3.54467	0.000393106	0.0130856	yes
809	AAEL021239-RA	110678451	zinc finger protein 239-like	7.24936	9.36778	9.24646	8.25742	23.4532	34.2368	23.2277	12.9182	15.9946	1.44359	0.45428	3.17775	0.00148424	0.0370264	yes
927	AAEL027779-RA	110675366	uncharacterized LOC110675366	89.4087	96.0198	122.259	97.254	335.38	249.802	251.633	256.211	187.246	1.4416	0.15941	9.04337	1.52e-19	3.32e-17	yes
324	AAEL006984-RB	5568651	probable cytochrome P450 28a5	56.7866	66.3551	55.4788	63.3069	179.417	134.411	154.851	180.855	111.433	1.42744	0.161534	8.83681	9.85e-19	2.09e-16	yes
824	AAEL021859-RA	110678456	uncharacterized LOC110678456	27.7892	14.8323	20.5477	5.50495	40.4567	55.7933	40.0032	43.0607	30.9985	1.40264	0.454456	3.08642	0.00202583	0.0469273	yes
792	AAEL020323-RA	110681386	DNA repair protein RAD50-like	9.66581	22.6388	32.8763	17.4323	52.1833	63.4015	49.0362	55.9789	37.9016	1.40255	0.351218	3.99339	6.51e-05	0.00295993	yes
608	AAEL012830-RA	5575236	histone chaperone asf1	151.028	176.427	220.888	165.148	549.977	448.882	436.164	427.377	321.986	1.38753	0.144863	9.57816	9.88e-22	2.35e-19	yes
166	AAEL003737-RB	5578867	putative ankyrin repeat protein RF_0381	77.3265	71.039	98.6289	92.6666	221.632	204.153	246.472	206.691	152.326	1.37472	0.140593	9.77798	1.4e-22	3.4e-20	yes
50	AAEL001246-RA	5569622	thymidylate kinase	22.9563	14.8323	9.24646	11.0099	34.5934	29.1647	30.9702	53.8259	25.8249	1.37431	0.40984	3.3533	0.000798554	0.0229119	yes
844	AAEL023274-RB	5573430	2-oxo-4-hydroxy-4-carboxy-5-ureidoimidazoline decarboxylase	14.4987	15.613	14.3834	21.1023	38.6977	55.7933	49.0362	26.9129	29.5047	1.36013	0.351912	3.86497	0.000111101	0.00463549	yes
522	AAEL011057-RA	5574281	DNA repair protein complementing XP-A cells homolog	60.4113	74.9423	56.5061	85.3267	174.14	172.452	183.241	181.931	123.619	1.34525	0.14733	9.13083	6.8e-20	1.5e-17	yes
356	AAEL007595-RD	5579964	cellular tumor antigen p53	22.9563	40.5937	20.5477	36.6996	38.1114	119.195	89.0395	63.5145	53.8322	1.33827	0.427829	3.12805	0.00175971	0.0421306	yes
590	AAEL012226-RA	5575975	protein brambleberry	155.861	147.543	142.806	138.541	402.808	355.048	321.316	386.47	256.299	1.33719	0.107716	12.414	2.19e-35	8.24e-33	yes
845	AAEL023321-RA	110674153	heat shock protein 70 A1-like	55.5784	56.9873	36.9858	43.1221	148.341	117.927	87.749	122.723	83.6767	1.31732	0.235543	5.5927	2.24e-08	2.31e-06	yes
287	AAEL006226-RA	5567623	deoxynucleoside triphosphate triphosphohydrolase SAMHD1	349.177	321.627	363.694	300.937	902.36	809.003	781.999	811.694	580.061	1.31577	0.08514	15.4541	7.07e-54	5.05e-51	yes
631	AAEL013453-RA	5577979	cingulin	16.9152	11.7097	6.16431	11.0099	30.4891	25.3606	21.9373	33.372	19.6198	1.30402	0.39437	3.3066	0.000944351	0.0262846	yes
617	AAEL013002-RB	5577107	cyclin-dependent kinase 9	402.339	429.357	442.803	461.498	1163.86	1039.78	1000.08	1059.29	749.877	1.29858	0.0748675	17.3451	2.15e-67	2.09e-64	yes
923	AAEL027589-RB	5565017	tudor domain-containing protein 1	21.7481	26.5421	34.9311	49.5445	94.9853	54.5253	98.0724	78.5857	57.3668	1.29573	0.327797	3.95283	7.72e-05	0.00342257	yes
422	AAEL009088-RH	5571447	epsin-1	50.7455	55.4261	56.5061	40.3696	121.37	114.123	91.6203	170.09	87.5313	1.29514	0.23999	5.39662	6.79e-08	6.52e-06	yes
80	AAEL001787-RC	5572270	deoxyribodipyrimidine photo-lyase	130.488	67.1358	67.8074	68.8118	207.56	140.751	278.732	187.314	143.575	1.29282	0.296553	4.3595	1.3e-05	0.000760265	yes
262	AAEL005663-RA	5566804	caltractin	297.224	209.214	242.463	236.713	551.149	597.242	632.309	622.227	423.567	1.29139	0.113066	11.4216	3.26e-30	1.04e-27	yes
487	AAEL010340-RC	5573249	serine/arginine-rich splicing factor 2	20.5398	17.9549	24.6572	12.8449	62.1509	38.0409	40.0032	40.9077	32.1374	1.28352	0.336918	3.8096	0.000139191	0.00564253	yes
73	AAEL001562-RA	5571291	endoribonuclease rege-1	137.738	153.788	179.792	150.469	445.61	363.924	332.93	362.786	265.88	1.28193	0.132696	9.66065	4.43e-22	1.07e-19	yes
812	AAEL021548-RA	5573487	nuclear pore complex protein Nup205	105.116	120.22	146.916	111.934	314.859	273.894	245.181	338.026	207.018	1.27905	0.152345	8.39577	4.63e-17	9.09e-15	yes
71	AAEL001511-RA	5571097	uncharacterized LOC5571097	1604.52	2388	2135.93	2291.89	5360.81	5126.64	5919.19	4034.79	3607.72	1.27891	0.159059	8.04048	8.95e-16	1.62e-13	yes
21	AAEL000515-RA	5578484	uncharacterized LOC5578484	193.316	149.104	140.752	95.4191	289.646	325.884	412.937	372.475	247.442	1.27782	0.215781	5.92185	3.18e-09	3.62e-07	yes
432	AAEL009271-RB	5571749	uncharacterized LOC5571749	54.3702	39.8131	54.4514	47.7095	139.546	83.6899	141.947	105.499	83.3782	1.27723	0.23486	5.43825	5.38e-08	5.3e-06	yes
800	AAEL020957-RA	5574061	ATP-dependent DNA helicase Q4	22.9563	34.3485	28.7668	25.6897	75.0501	63.4015	55.4884	76.4327	47.7667	1.27133	0.23786	5.34487	9.05e-08	8.42e-06	yes
709	AAEL017566-RB	23687986	DNA ligase 1	105.116	100.704	93.492	99.089	269.711	194.008	270.99	214.227	168.417	1.25927	0.150451	8.36997	5.76e-17	1.11e-14	yes
510	AAEL010877-RA	5574032	protein lethal(2)denticleless	39.8715	42.9357	55.4788	33.0297	104.367	86.226	76.1352	138.871	72.1142	1.25015	0.268184	4.66154	3.14e-06	0.000206702	yes
573	AAEL011978-RB	5575653	alpha-mannosidase 2	109.949	55.4261	94.5194	89.9141	186.453	224.441	197.435	217.456	146.949	1.24942	0.204857	6.09898	1.07e-09	1.28e-07	yes
630	AAEL013352-RA	5577713	protein lethal(2)essential for life	16.9152	22.6388	16.4382	24.7723	54.5286	58.3293	51.6171	26.9129	34.019	1.23484	0.349483	3.53333	0.000410356	0.0135127	yes
577	AAEL012083-RJ	5575809	tyrosine-protein phosphatase 10D	55.5784	73.381	52.3966	72.4818	114.92	144.555	232.277	109.805	106.924	1.2324	0.288351	4.27396	1.92e-05	0.00106206	yes
684	AAEL014578-RC	5571867	E3 ubiquitin-protein ligase MARCH6	22.9563	66.3551	57.5335	71.5643	194.661	125.535	100.653	91.504	91.3453	1.22801	0.389521	3.15261	0.00161815	0.0395828	yes
190	AAEL004007-RB	5563982	tRNA modification GTPase GTPBP3, mitochondrial	18.1234	12.4904	27.7394	37.6171	45.7337	50.7212	63.2309	64.591	40.0309	1.22129	0.379211	3.22062	0.00127914	0.0329598	yes
874	AAEL024958-RA	5577497	lachesin	88.2005	62.4519	60.6157	77.9867	163.586	155.968	167.755	173.319	118.735	1.20446	0.146808	8.20428	2.32e-16	4.32e-14	yes
337	AAEL007246-RA	5568938	uncharacterized LOC5568938	112.365	168.62	132.533	124.779	428.02	266.286	280.023	260.517	221.643	1.1996	0.214083	5.60347	2.1e-08	2.19e-06	yes
6	AAEL000128-RC	5567758	retinoblastoma-like protein 2	525.578	540.989	432.529	577.102	1391.36	985.259	1231.07	1151.87	854.47	1.19809	0.132585	9.03636	1.62e-19	3.5e-17	yes
13	AAEL000204-RI	5570053	uncharacterized LOC5570053	18.1234	11.7097	11.3012	12.8449	37.5251	25.3606	25.8085	31.219	21.7365	1.19401	0.348372	3.42739	0.000609419	0.0185724	yes
778	AAEL019857-RA	5564429	uncharacterized LOC5564429	201.774	250.588	295.887	302.772	532.973	636.551	531.656	702.966	431.896	1.19005	0.15712	7.57414	3.62e-14	6.05e-12	yes
879	AAEL025166-RA	110680693	histone H1-like	59.2031	32.0066	36.9858	30.2772	61.5645	111.587	100.653	80.7388	64.127	1.16531	0.308055	3.7828	0.000155073	0.00614665	yes
426	AAEL009131-RA	5571543	cytochrome P450 6d3	1204.6	1581.59	1478.41	1476.24	3379.6	2822.63	3774.5	2876.45	2324.25	1.16194	0.125651	9.24737	2.3e-20	5.24e-18	yes
449	AAEL009534-RA	5572122	dimethyladenosine transferase 1, mitochondrial	265.81	121.781	161.299	173.406	212.251	513.552	517.461	370.322	291.985	1.1598	0.329552	3.51931	0.000432665	0.0141386	yes
542	AAEL011255-RA	5574612	guanine nucleotide-binding protein-like 3 homolog	813.136	747.861	764.374	713.808	1768.95	1734.66	1503.35	1685.83	1216.5	1.14301	0.071707	15.94	3.35e-57	2.47e-54	yes
81	AAEL001787-RE	5572270	deoxyribodipyrimidine photo-lyase	202.982	149.104	136.642	157.808	410.43	414.646	255.505	336.95	258.008	1.13963	0.1943	5.86533	4.48e-09	5.05e-07	yes
715	AAEL018181-RB	5572204	uncharacterized LOC5572204	95.4498	97.5811	70.8895	68.8118	200.524	182.596	200.016	148.559	133.054	1.13902	0.177137	6.43016	1.27e-10	1.68e-08	yes
558	AAEL011665-RA	5575108	uncharacterized LOC5575108	960.54	708.829	703.758	822.989	1608.3	1808.21	1533.03	2065.84	1276.44	1.13545	0.137384	8.26481	1.4e-16	2.67e-14	yes
918	AAEL027228-RA	5563629	uncharacterized LOC5563629	14.4987	24.9808	24.6572	27.5247	52.7696	43.113	55.4884	51.6728	36.8381	1.13082	0.263533	4.29101	1.78e-05	0.000992075	yes
486	AAEL010317-RA	5573219	probable ATP-dependent RNA helicase DDX27	198.149	206.872	266.093	216.528	534.146	464.099	434.874	475.821	349.573	1.11031	0.117655	9.43701	3.84e-21	8.92e-19	yes
302	AAEL006488-RB	5568050	nuclear pore complex protein Nup88	221.105	216.24	221.915	234.878	484.308	432.398	504.557	500.58	351.998	1.10596	0.081991	13.4888	1.82e-41	8.29e-39	yes
62	AAEL001378-RB	5570348	spermine synthase	68.8689	81.1875	89.3824	58.7194	203.456	136.947	158.723	134.565	116.481	1.09649	0.209363	5.23726	1.63e-07	1.44e-05	yes
183	AAEL003950-RA	5579657	chromatin-remodeling complex ATPase chain Iswi	24.1645	52.3035	43.1501	41.2871	102.021	62.1334	74.8448	103.346	62.9063	1.08423	0.294451	3.68221	0.000231224	0.00862216	yes
498	AAEL010576-RBD	5573536	modifier of mdg4	54.3702	56.2067	36.9858	48.627	82.6724	147.091	109.686	79.6623	76.9128	1.0828	0.269033	4.0248	5.7e-05	0.00262482	yes
745	AAEL019569-RA	5575087	uncharacterized LOC5575087	36.2468	32.0066	26.712	42.2046	72.7048	76.0818	55.4884	83.9683	53.1766	1.07589	0.235056	4.57718	4.71e-06	0.000301117	yes
688	AAEL014842-RB	5565995	multiple inositol polyphosphate phosphatase 1	27.7892	14.8323	20.5477	33.9472	55.7012	54.5253	46.4554	45.2137	37.3765	1.0726	0.311696	3.44117	0.000579204	0.0178122	yes
723	AAEL018336-RA	5564301	RING-box protein 2	398.715	319.285	340.064	397.274	756.951	784.91	744.576	748.179	561.244	1.06474	0.0854613	12.4588	1.25e-35	4.79e-33	yes
671	AAEL014376-RB	5564277	uncharacterized LOC5564277	24.1645	20.2969	26.712	12.8449	36.3524	43.113	45.1649	50.5963	32.4056	1.06302	0.306567	3.46748	0.000525354	0.0165606	yes
550	AAEL011427-RB	5574779	zinc finger protein 879	32.6221	45.2776	24.6572	39.4521	76.2228	73.5457	87.749	61.3615	55.111	1.0566	0.246342	4.28918	1.79e-05	0.000997005	yes
678	AAEL014455-RA	5564468	uncharacterized LOC5564468	56.7866	35.1292	31.8489	39.4521	75.0501	71.0096	108.396	82.8918	62.5705	1.05445	0.253114	4.1659	3.1e-05	0.00160334	yes
38	AAEL001037-RA	5579906	pre-rRNA processing protein FTSJ3	217.481	265.421	257.874	221.115	554.081	479.315	490.362	469.361	369.376	1.0521	0.102376	10.2768	8.96e-25	2.49e-22	yes
803	AAEL020983-RA	5569410	uncharacterized LOC5569410	44.7044	60.8906	62.6705	42.2046	118.438	97.6382	99.3629	119.493	80.6754	1.04868	0.192861	5.43752	5.4e-08	5.3e-06	yes
85	AAEL001856-RA	5572668	adenosine kinase	807.095	822.804	771.566	790.877	1737.88	1768.9	1419.47	1638.46	1219.63	1.04141	0.0801645	12.9909	1.38e-38	6.02e-36	yes
347	AAEL007403-RA	5569143	proteoglycan 4	24.1645	26.5421	44.1775	38.5346	73.8774	54.5253	55.4884	89.3509	50.8326	1.04103	0.29726	3.50207	0.000461652	0.0149263	yes
506	AAEL010759-RA	5573833	cell cycle checkpoint control protein RAD9A	39.8715	49.9615	62.6705	51.3795	109.644	109.051	85.1682	115.187	77.8666	1.04034	0.189406	5.49264	3.96e-08	4.02e-06	yes
656	AAEL014051-RA	5579213	nucleolar protein 14 homolog	97.8663	103.826	89.3824	86.2441	204.629	188.936	181.95	197.003	143.73	1.03923	0.118596	8.76272	1.91e-18	4e-16	yes
425	AAEL009130-RA	5571542	probable cytochrome P450 6d4	244.062	491.028	328.763	401.861	754.605	966.238	558.755	729.879	559.399	1.03517	0.238161	4.34652	1.38e-05	0.000800124	yes
479	AAEL010151-RB	5572936	probable cytochrome P450 6a14	402.339	304.453	297.941	298.185	681.901	580.757	633.6	761.098	495.034	1.03404	0.132149	7.82483	5.08e-15	8.77e-13	yes
791	AAEL020101-RA	5567211	eukaryotic translation initiation factor 2-alpha kinase 1	105.116	123.342	90.4098	100.007	210.492	243.462	227.115	181.931	160.234	1.03236	0.146076	7.06727	1.58e-12	2.38e-10	yes
831	AAEL022334-RA	110675612	uncharacterized LOC110675612	6245.32	6459.09	6063.62	6143.52	10720.4	13633.8	13392.1	13160.4	9477.29	1.03056	0.0847446	12.1608	5.03e-34	1.79e-31	yes
363	AAEL007729-RA	5579981	uncharacterized LOC5579981	251.311	271.666	278.421	244.053	535.318	530.036	458.102	603.926	396.604	1.02613	0.103186	9.94453	2.66e-23	6.95e-21	yes
94	AAEL002084-RB	5573412	sin3 histone deacetylase corepressor complex component SDS3	305.681	390.324	331.845	333.049	729.98	702.488	600.048	730.955	515.546	1.01978	0.104056	9.80027	1.12e-22	2.79e-20	yes
314	AAEL006794-RB	5579924	endoribonuclease Dicer	520.745	710.39	698.621	600.957	1328.62	1271.83	1271.07	1232.61	954.356	1.00973	0.102704	9.8314	8.25e-23	2.08e-20	yes
355	AAEL007595-RB	5579964	cellular tumor antigen p53	216.272	197.504	234.244	226.62	473.167	419.718	406.484	447.831	327.73	1.00952	0.0924502	10.9196	9.29e-28	2.8e-25	yes
668	AAEL014348-RC	5564196	caspase	24.1645	50.7422	23.6298	34.8647	61.5645	77.3498	80.0065	53.8259	50.7685	1.00619	0.317146	3.17265	0.00151057	0.0375519	yes
884	AAEL025525-RA	5579907	elongation factor-like GTPase 1	66.4524	90.5552	76.0265	85.3267	162.999	176.256	162.594	143.177	120.423	1.00299	0.141713	7.07764	1.47e-12	2.24e-10	yes
379	AAEL007939-RA	5569841	cell division control protein 45 homolog	25.3727	22.6388	27.7394	30.2772	51.5969	57.0613	41.2937	61.3615	39.6677	1.0003	0.247191	4.04669	5.19e-05	0.00245596	yes
554	AAEL011505-RB	5574897	nuclear pore membrane glycoprotein 210	157.069	165.498	164.382	191.756	385.804	362.656	310.993	288.507	253.333	0.993154	0.129784	7.65235	1.97e-14	3.38e-12	yes
627	AAEL013142-RB	5577288	polynucleotide 5'-hydroxyl-kinase NOL9	37.455	66.3551	79.1086	55.0495	155.963	101.442	122.591	92.5805	88.8181	0.991176	0.277772	3.5683	0.000359302	0.0121685	yes
622	AAEL013075-RB	5577193	46 kDa FK506-binding nuclear protein	438.586	572.215	555.815	517.465	1178.52	999.207	894.266	1044.22	775.037	0.982211	0.117133	8.38544	5.05e-17	9.83e-15	yes
609	AAEL012830-RB	5575236	histone chaperone asf1	65.2442	63.2325	53.424	57.8019	107.885	138.215	101.944	127.029	89.3469	0.980464	0.16796	5.83748	5.3e-09	5.94e-07	yes
832	AAEL022346-RA	5575295	glutathione S-transferase 1	49.5373	56.9873	39.0406	44.9571	77.3954	107.782	112.267	83.9683	71.492	0.980272	0.217338	4.51036	6.47e-06	0.000399191	yes
568	AAEL011830-RC	5575432	probable methylthioribulose-1-phosphate dehydratase	43.4961	63.2325	50.3418	29.3597	69.7731	79.8858	117.429	103.346	69.608	0.977428	0.296178	3.30014	0.000966373	0.0267584	yes
254	AAEL005412-RA	5566469	annexin B10	74.91	62.4519	81.1634	71.5643	150.687	168.648	152.27	97.9631	107.457	0.977192	0.204186	4.7858	1.7e-06	0.000123991	yes
107	AAEL002345-RB	5568156	E3 ubiquitin-protein ligase listerin	252.519	174.085	173.628	180.746	426.261	448.882	372.933	282.047	288.888	0.975658	0.189659	5.14427	2.69e-07	2.27e-05	yes
601	AAEL012546-RA	5580252	DNA replication licensing factor Mcm6	27.7892	25.7614	23.6298	25.6897	56.8739	54.5253	49.0362	39.8311	37.8921	0.973444	0.245577	3.96391	7.37e-05	0.00329474	yes
782	AAEL019896-RA	5564539	midasin	322.596	374.711	431.501	369.749	849.591	547.789	656.827	847.219	549.998	0.955265	0.166576	5.73472	9.77e-09	1.07e-06	yes
883	AAEL025367-RA	110678855	uncharacterized LOC110678855	2395.91	1227.96	1014.03	1075.3	2666.62	3290.54	2589.89	2514.74	2096.87	0.953792	0.272123	3.50501	0.000456595	0.0148075	yes
821	AAEL021826-RD	5572440	probable nuclear hormone receptor HR38	51.9537	60.1099	68.8348	39.4521	115.507	115.391	121.3	73.2032	80.7189	0.948918	0.248504	3.81852	0.000134256	0.00550503	yes
5	AAEL000109-RA	5567790	enolase-phosphatase E1-like	59.2031	67.9164	125.341	115.604	186.453	191.472	134.204	194.85	134.38	0.942272	0.273912	3.44005	0.000581608	0.0178604	yes
257	AAEL005469-RB	5566550	zinc finger CCCH domain-containing protein 18	338.303	316.163	336.982	298.185	670.76	653.035	545.851	594.237	469.189	0.941417	0.0917897	10.2562	1.11e-24	3.04e-22	yes
875	AAEL024958-RB	5577497	lachesin	66.4524	81.1875	107.875	96.3365	171.208	191.472	130.333	181.931	128.35	0.938324	0.191574	4.89796	9.68e-07	7.48e-05	yes
61	AAEL001378-RA	5570348	spermine synthase	204.19	220.143	184.929	233.96	406.326	368.996	450.359	390.776	307.46	0.934119	0.103467	9.02823	1.74e-19	3.73e-17	yes
241	AAEL005071-RB	5565953	GTP-binding protein 2	921.876	637.79	575.335	546.825	1467.58	1172.93	1027.18	1427.46	972.122	0.928426	0.193595	4.79571	1.62e-06	0.000118821	yes
229	AAEL004854-RA	5565550	DAZ-associated protein 2	50.7455	46.0583	77.0538	57.8019	128.406	102.71	112.267	92.5805	83.4529	0.924668	0.214747	4.30586	1.66e-05	0.000939397	yes
785	AAEL019944-RA	5575630	squamous cell carcinoma antigen recognized by T-cells 3	321.388	344.266	340.064	304.607	689.523	626.406	557.464	598.544	472.783	0.920944	0.0909502	10.1258	4.24e-24	1.14e-21	yes
454	AAEL009636-RD	5580009	exportin-7	285.141	388.763	335.955	254.145	609.196	504.676	616.824	650.216	455.614	0.911735	0.150178	6.07102	1.27e-09	1.49e-07	yes
119	AAEL002646-RB	5575446	cytohesin-1	115.99	51.5228	87.3277	63.3069	152.446	130.607	166.465	138.871	113.317	0.900763	0.257601	3.49674	0.000470982	0.0151593	yes
753	AAEL019662-RA	5573805	histone acetyltransferase KAT7	30.2056	50.7422	48.2871	51.3795	99.6759	78.6178	72.2639	86.1214	64.6617	0.89711	0.22321	4.01913	5.84e-05	0.00267729	yes
109	AAEL002386-RA	5574495	uncharacterized protein KIAA2013 homolog	483.29	481.66	489.035	483.518	888.875	926.929	854.263	922.575	691.268	0.890749	0.0545706	16.3229	6.79e-60	5.59e-57	yes
167	AAEL003738-RA	5578870	uncharacterized LOC5578870	43.4961	59.3293	54.4514	41.2871	102.021	87.494	107.105	72.1266	70.9139	0.888686	0.214849	4.13633	3.53e-05	0.00178568	yes
807	AAEL021206-RA	5576585	non-homologous end-joining factor 1	80.9511	74.1616	52.3966	60.5544	112.575	138.215	90.3299	150.712	94.987	0.876589	0.224648	3.90205	9.54e-05	0.00409943	yes
689	AAEL014931-RG	5565670	sterile alpha and TIR motif-containing protein 1	225.938	186.575	287.668	230.29	473.754	391.821	575.53	257.288	328.608	0.869251	0.250137	3.4751	0.00051066	0.0161689	yes
440	AAEL009382-RA	5571894	bifunctional lysine-specific demethylase and histidyl-hydroxylase NO66	60.4113	53.8648	48.2871	44.9571	87.363	74.8137	98.0724	115.187	72.8696	0.859055	0.201383	4.26578	1.99e-05	0.00109326	yes
213	AAEL004482-RA	5564891	RRP15-like protein	47.1208	56.2067	47.2597	47.7095	94.399	83.6899	85.1682	92.5805	69.2668	0.843882	0.167342	5.04287	4.59e-07	3.73e-05	yes
621	AAEL013072-RA	5580326	tudor and KH domain-containing protein homolog	606.529	625.3	685.265	604.627	1194.35	1136.15	1143.32	1042.07	879.702	0.84272	0.0686098	12.2828	1.12e-34	4.14e-32	yes
819	AAEL021795-RA	110675609	uncharacterized LOC110675609	7692.77	7050.04	7389.98	6624.28	13677.9	12445.7	13504.3	11857.8	10030.4	0.840677	0.0712006	11.8072	3.58e-32	1.22e-29	yes
856	AAEL023762-RA	110680648	E3 ubiquitin-protein ligase Mdm2-like	38.6632	60.1099	64.7252	50.462	97.9169	91.2981	112.267	85.0449	75.0609	0.840482	0.200051	4.20134	2.65e-05	0.00140575	yes
372	AAEL007810-RA	5569648	augmin complex subunit dgt6	27.7892	24.2001	21.5751	29.3597	42.2157	41.845	49.0362	51.6728	35.9617	0.83959	0.245005	3.42683	0.000610671	0.0185724	yes
860	AAEL024141-RG	5564524	paired amphipathic helix protein Sin3a	495.373	382.518	531.158	461.498	1023.73	787.446	614.243	898.892	649.357	0.833808	0.174421	4.78043	1.75e-06	0.000126918	yes
186	AAEL003978-RA	5579646	zinc finger protein 329	73.7018	84.3101	83.2181	78.9042	139.546	128.071	149.69	155.018	111.557	0.831323	0.132022	6.29684	3.04e-10	3.85e-08	yes
412	AAEL008719-RA	5570989	probable small nuclear ribonucleoprotein G	403.547	256.833	313.352	295.432	475.513	554.129	646.504	579.166	440.56	0.831286	0.158449	5.24638	1.55e-07	1.37e-05	yes
665	AAEL014265-RB	5575648	proline-, glutamic acid- and leucine-rich protein 1	37.455	64.0132	57.5335	48.627	90.2947	105.246	85.1682	92.5805	72.6148	0.827383	0.198595	4.16618	3.1e-05	0.00160334	yes
443	AAEL009399-RA	5571924	nucleoporin Nup37	37.455	28.1034	27.7394	33.9472	55.7012	50.7212	61.9405	54.9024	43.8138	0.821347	0.218715	3.75533	0.000173113	0.0067492	yes
647	AAEL013902-RC	5578898	programmed cell death protein 2	68.8689	72.6003	60.6157	70.6468	107.298	124.267	103.234	149.636	94.6458	0.821254	0.175749	4.67289	2.97e-06	0.000196802	yes
362	AAEL007701-RB	5569519	putative E3 ubiquitin-protein ligase UBR7	207.815	256.833	254.791	209.188	467.89	390.553	432.293	345.562	320.616	0.818231	0.13239	6.18045	6.39e-10	8e-08	yes
374	AAEL007882-RA	5569735	nucleolar transcription factor 1-B	76.1182	85.0907	73.9717	96.3365	174.14	125.535	121.3	158.248	113.842	0.81435	0.179346	4.54067	5.61e-06	0.00035198	yes
397	AAEL008391-RA	5570580	endoplasmic reticulum-Golgi intermediate compartment protein 3	85.784	84.3101	83.2181	107.346	171.794	152.164	160.013	147.483	124.014	0.813669	0.136888	5.94406	2.78e-09	3.18e-07	yes
555	AAEL011562-RA	5574962	caspase Dronc	240.437	245.904	241.435	233.043	427.434	453.954	455.521	346.639	330.546	0.806912	0.105907	7.61909	2.55e-14	4.31e-12	yes
191	AAEL004063-RB	5564060	protein Notchless	93.0334	121.781	125.341	97.254	182.935	201.617	167.755	216.38	150.762	0.806326	0.146936	5.48762	4.07e-08	4.11e-06	yes
76	AAEL001623-RA	5571500	proteasome activator complex subunit 3	1168.35	985.179	1020.19	1064.29	1827	1888.1	1733.04	1878.52	1445.58	0.792813	0.0646783	12.2578	1.53e-34	5.54e-32	yes
465	AAEL009850-RA	5572513	uncharacterized LOC5572513	48.329	37.4711	58.5609	35.7821	89.7083	58.3293	81.2969	77.5092	60.8734	0.789427	0.244445	3.22947	0.00124021	0.0321375	yes
279	AAEL006158-RA	5567559	histone H3.3	4944.06	4624.56	4676.65	4592.04	7920.13	8178.79	7849.67	8575.54	6420.18	0.788385	0.0444131	17.7512	1.69e-70	1.72e-67	yes
11	AAEL000194-RE	5570029	phosphatidylinositol 4-kinase alpha	238.021	120.22	172.601	136.706	269.125	206.689	335.511	336.95	226.978	0.788021	0.251621	3.13178	0.00173752	0.0416927	yes
231	AAEL004877-RA	5565615	nucleoporin Ndc1	36.2468	39.0324	39.0406	32.1122	68.0142	60.8654	59.3596	58.1319	49.1004	0.761443	0.200807	3.79192	0.000149484	0.00598049	yes
924	AAEL027692-RA	110680668	nucleoporin Ndc1-like	36.2468	39.0324	39.0406	32.1122	68.0142	60.8654	59.3596	58.1319	49.1004	0.761443	0.200807	3.79192	0.000149484	0.00598049	yes
905	AAEL026665-RA	5564754	probable cytochrome P450 9f2	437.378	567.532	437.666	730.323	891.22	963.702	774.256	1044.22	730.787	0.755941	0.185349	4.07847	4.53e-05	0.00219531	yes
749	AAEL019598-RA	5573730	periodic tryptophan protein 2 homolog	88.2005	124.904	133.56	86.2441	199.938	183.864	165.175	181.931	145.477	0.755341	0.174815	4.3208	1.55e-05	0.000886024	yes
661	AAEL014204-RA	5563882	6-phosphogluconolactonase	374.55	343.485	322.599	391.769	565.221	626.406	616.824	603.926	480.598	0.748394	0.0810423	9.23461	2.59e-20	5.84e-18	yes
891	AAEL026031-RA	5570565	ATP-binding cassette sub-family A member 3	41.0797	59.3293	55.4788	54.132	95.5716	91.2981	89.0395	78.5857	70.5643	0.746821	0.177541	4.20647	2.59e-05	0.00137767	yes
3	AAEL000076-RB	5563560	probable dimethyladenosine transferase	78.5347	74.1616	86.3003	73.3993	123.129	129.339	156.142	116.264	104.659	0.742725	0.150292	4.94187	7.74e-07	6.11e-05	yes
269	AAEL005898-RB	5567166	tRNA-dihydrouridine(20a/20b) synthase [NAD(P)+]-like	44.7044	60.1099	56.5061	53.2145	90.881	101.442	73.5543	93.657	71.7587	0.736557	0.179711	4.09856	4.16e-05	0.00205027	yes
919	AAEL027396-RA	110681378	nucleolar protein 14 homolog	41.0797	60.1099	47.2597	64.2244	97.3306	81.1539	96.782	80.7388	71.0849	0.734002	0.197838	3.71012	0.000207158	0.00783393	yes
383	AAEL008068-RB	5569987	integrator complex subunit 3 homolog	254.936	259.956	298.969	253.227	396.358	465.367	495.524	425.224	356.195	0.733128	0.103298	7.09723	1.27e-12	1.97e-10	yes
39	AAEL001039-RB	5579894	metaxin-1 homolog	61.6195	65.5745	49.3145	67.8943	100.262	122.999	90.3299	94.7335	81.5909	0.732098	0.177999	4.11293	3.91e-05	0.00194913	yes
546	AAEL011357-RB	5574723	protein MAK16 homolog A	135.321	150.665	169.518	158.726	248.603	291.647	228.406	254.058	204.618	0.730122	0.114277	6.38904	1.67e-10	2.18e-08	yes
666	AAEL014273-RD	5564010	vesicle-associated membrane protein 7	71.2853	68.6971	55.4788	66.9768	100.849	128.071	121.3	88.2744	87.6165	0.72937	0.180478	4.04133	5.31e-05	0.00250269	yes
818	AAEL021771-RA	5563776	eukaryotic translation initiation factor 2-alpha kinase	341.928	432.479	406.844	366.079	762.814	556.665	600.048	609.309	509.521	0.711309	0.128038	5.55546	2.77e-08	2.84e-06	yes
60	AAEL001351-RA	5570094	uncharacterized LOC5570094	1612.98	1504.31	1473.27	1481.75	2719.98	2458.71	2096.94	2620.24	1996.02	0.706663	0.0895303	7.893	2.95e-15	5.18e-13	yes
516	AAEL011006-RF	5574237	guanylate kinase	165.527	177.207	124.314	123.861	299.614	204.153	250.343	204.538	193.695	0.703702	0.19186	3.66779	0.000244652	0.00896666	yes
33	AAEL000952-RB	5567471	testis-expressed protein 10 homolog	106.324	127.246	114.04	130.284	204.629	215.565	172.917	187.314	157.29	0.703686	0.122192	5.75887	8.47e-09	9.29e-07	yes
595	AAEL012456-RB	5576307	RING finger protein unkempt	154.653	140.517	195.203	176.158	337.725	282.771	273.57	186.237	218.354	0.701899	0.201571	3.48214	0.00049743	0.0158674	yes
403	AAEL008587-RB	5570802	glutamate [NMDA] receptor subunit 1	177.609	167.059	184.929	131.201	180.003	268.822	281.313	346.639	217.197	0.700585	0.21715	3.22627	0.00125416	0.0324596	yes
470	AAEL009908-RA	5572590	glutamyl-tRNA(Gln) amidotransferase subunit B, mitochondrial	173.985	202.188	184.929	153.221	354.143	289.111	261.957	247.599	233.391	0.696551	0.152798	4.55864	5.15e-06	0.000327003	yes
730	AAEL019408-RA	5564117	peroxiredoxin 1	1134.52	1487.14	1400.33	1419.36	2554.05	2320.49	1801.44	2126.12	1780.43	0.694047	0.130505	5.31814	1.05e-07	9.55e-06	yes
152	AAEL003415-RB	5578090	lamin Dm0	732.185	898.527	889.715	808.309	1530.9	1297.19	1249.13	1302.59	1088.57	0.693577	0.0974557	7.11685	1.1e-12	1.75e-10	yes
319	AAEL006887-RA	5568468	mRNA turnover protein 4 homolog	53.1619	72.6003	84.2455	63.3069	105.539	119.195	114.848	106.575	89.934	0.692925	0.168049	4.12336	3.73e-05	0.00186728	yes
321	AAEL006908-RB	5568486	PITH domain-containing protein GA19395	83.3676	98.3617	90.4098	70.6468	140.133	150.895	122.591	141.024	112.179	0.691601	0.147669	4.68347	2.82e-06	0.000189854	yes
106	AAEL002322-RA	5574346	uncharacterized LOC5574346	72.4936	73.381	81.1634	64.2244	111.989	114.123	126.462	118.417	95.2816	0.688807	0.141641	4.86304	1.16e-06	8.74e-05	yes
137	AAEL003070-RA	5576962	tetratricopeptide repeat protein 27	48.329	68.6971	62.6705	53.2145	97.9169	87.494	91.6203	100.116	76.2573	0.688522	0.170151	4.04655	5.2e-05	0.00245596	yes
230	AAEL004868-RA	5565617	adipocyte plasma membrane-associated protein	259.769	225.607	280.476	213.775	421.571	375.337	380.676	386.47	317.96	0.685737	0.105938	6.47299	9.61e-11	1.29e-08	yes
265	AAEL005787-RA	5567041	serine protease easter	66.4524	49.1809	60.6157	69.7293	91.4673	102.71	118.719	82.8918	80.2209	0.684187	0.192348	3.55702	0.000375082	0.0125835	yes
317	AAEL006883-RA	5568477	growth arrest and DNA damage-inducible protein GADD45 alpha	250.103	278.692	191.094	216.528	373.492	418.45	393.58	320.802	305.342	0.68193	0.143114	4.76494	1.89e-06	0.0001362	yes
305	AAEL006549-RA	5568119	U3 small nucleolar RNA-associated protein 4 homolog	66.4524	82.7488	85.2729	82.5742	112.575	140.751	131.624	131.335	104.167	0.681317	0.147785	4.61019	4.02e-06	0.00026045	yes
334	AAEL007230-RA	5568934	mediator of RNA polymerase II transcription subunit 30	72.4936	66.3551	69.8621	83.4917	116.679	120.463	113.558	117.34	95.0303	0.681301	0.140329	4.85502	1.2e-06	9.01e-05	yes
527	AAEL011161-RF	5574435	uncharacterized LOC5574435	215.064	213.117	201.367	191.756	219.287	401.965	365.191	336.95	268.087	0.680982	0.190205	3.58025	0.000343265	0.0118123	yes
58	AAEL001324-RB	5570075	replication factor C subunit 1	189.691	205.311	236.298	211.023	395.186	343.636	294.217	308.96	273.04	0.679222	0.12702	5.34736	8.92e-08	8.34e-06	yes
762	AAEL019796-RA	5569631	uncharacterized LOC5569631	70.0771	63.2325	55.4788	62.3894	93.8126	105.246	107.105	97.9631	81.9132	0.678769	0.153094	4.43368	9.26e-06	0.000555421	yes
888	AAEL025927-RA	5574819	uncharacterized LOC5574819	161.902	242.782	221.915	226.62	341.243	361.388	339.382	331.567	278.35	0.677229	0.123847	5.46826	4.54e-08	4.55e-06	yes
677	AAEL014454-RA	5564470	uncharacterized LOC5564470	97.8663	85.8713	67.8074	65.1419	115.507	144.555	108.396	136.718	102.733	0.67431	0.184687	3.6511	0.000261119	0.00939328	yes
731	AAEL019439-RB	5572583	PDZ and LIM domain protein Zasp	50.7455	78.8455	65.7526	68.8118	132.51	109.051	87.749	90.4274	85.4866	0.670856	0.216099	3.1044	0.00190665	0.0448955	yes
545	AAEL011315-RA	5574673	uncharacterized LOC5574673	459.126	451.215	356.502	427.551	635.581	706.292	672.312	685.741	549.29	0.669023	0.0910376	7.34886	2e-13	3.22e-11	yes
887	AAEL025680-RA	110681150	enolase-phosphatase E1	1019.74	1021.87	982.18	882.626	1734.36	1429.07	1582.06	1440.38	1261.54	0.66579	0.0870943	7.64448	2.1e-14	3.56e-12	yes
335	AAEL007237-RB	5568936	protein asteroid	56.7866	49.1809	41.0954	44.9571	77.3954	59.5974	82.5873	82.8918	61.8115	0.66544	0.197472	3.36979	0.000752266	0.0217588	yes
633	AAEL013463-RA	5577983	nucleolar protein 10	47.1208	45.2776	41.0954	43.1221	63.3235	62.1334	76.1352	78.5857	57.0992	0.657924	0.190076	3.46137	0.000537429	0.0168915	yes
421	AAEL009084-RA	5571452	protein KRI1 homolog	105.116	136.614	129.45	143.129	191.73	164.844	220.663	237.91	166.182	0.656688	0.156519	4.19558	2.72e-05	0.00143133	yes
816	AAEL021595-RA	5569150	elongator complex protein 5	77.3265	68.6971	88.3551	73.3993	121.956	131.875	129.043	100.116	98.846	0.653215	0.156167	4.18279	2.88e-05	0.00150323	yes
452	AAEL009623-RA	5572189	RNA 3'-terminal phosphate cyclase	105.116	167.839	107.875	157.808	195.248	216.833	246.472	195.926	174.14	0.652849	0.189671	3.442	0.000577427	0.0177831	yes
400	AAEL008551-RA	5570754	transcription factor grauzone	132.905	155.349	135.615	127.531	221.632	252.338	205.178	189.467	177.502	0.650153	0.127869	5.08451	3.69e-07	3.11e-05	yes
349	AAEL007534-RA	5569297	uncharacterized LOC5569297	238.021	319.285	280.476	299.102	515.969	429.862	378.095	457.52	364.791	0.649205	0.131403	4.94057	7.79e-07	6.11e-05	yes
838	AAEL022773-RC	5571149	tudor domain-containing protein 5	79.7429	99.923	77.0538	111.934	164.758	158.504	110.977	143.177	118.259	0.647967	0.190137	3.4079	0.000654642	0.0194881	yes
96	AAEL002108-RA	5573604	ribosomal RNA small subunit methyltransferase NEP1	119.614	113.975	93.492	124.779	162.999	185.132	190.983	173.319	145.537	0.646108	0.128057	5.04548	4.52e-07	3.7e-05	yes
32	AAEL000898-RB	5567220	glutactin	113.573	103.046	89.3824	92.6666	137.787	177.524	130.333	178.702	127.877	0.644528	0.161794	3.98362	6.79e-05	0.00305841	yes
9	AAEL000185-RD	5570050	eukaryotic translation initiation factor 5	373.342	348.169	251.709	344.059	471.995	486.923	531.656	568.401	422.032	0.642917	0.133329	4.82203	1.42e-06	0.000105245	yes
315	AAEL006800-RA	5579925	sodium- and chloride-dependent transporter XTRP3B	57.9948	79.6262	49.3145	77.0692	116.679	86.226	100.653	108.728	84.5365	0.641125	0.207603	3.08823	0.00201354	0.0468157	yes
685	AAEL014705-RA	5565022	transmembrane protein 183	112.365	111.633	118.149	162.396	194.661	199.081	196.145	192.697	160.891	0.630005	0.143825	4.38035	1.18e-05	0.00069674	yes
345	AAEL007383-RG	5569122	soma ferritin	1306.09	1454.35	1005.81	1626.71	2138.93	2085.91	2081.46	2012.01	1713.91	0.624651	0.138726	4.50278	6.71e-06	0.000412527	yes
615	AAEL012962-RA	5577045	probable ATP-dependent RNA helicase DDX52	107.532	95.2391	99.6563	107.346	141.892	163.576	140.657	186.237	130.267	0.623889	0.140864	4.42901	9.47e-06	0.000565985	yes
863	AAEL024342-RA	5576851	transmembrane protein 209	55.5784	81.1875	68.8348	50.462	96.1579	106.514	100.653	94.7335	81.7652	0.622262	0.188786	3.29612	0.000980313	0.0271093	yes
490	AAEL010422-RA	5573324	histone RNA hairpin-binding protein	105.116	74.1616	80.136	79.8217	117.852	142.019	130.333	129.182	107.328	0.61879	0.153198	4.03914	5.36e-05	0.00250348	yes
143	AAEL003174-RC	5577422	probable RNA-binding protein EIF1AD	56.7866	85.8713	78.0812	65.1419	107.298	91.2981	105.815	135.641	90.7417	0.614882	0.197545	3.11261	0.00185442	0.0439493	yes
591	AAEL012233-RC	5575983	myc protein	144.987	142.078	144.861	165.148	295.51	187.668	198.726	223.916	187.862	0.61361	0.170543	3.59797	0.000320708	0.0112164	yes
256	AAEL005445-RA	5566519	uncharacterized LOC5566519	88.2005	81.1875	94.5194	94.5016	144.823	126.803	148.399	124.876	112.914	0.613529	0.133853	4.58359	4.57e-06	0.000292904	yes
283	AAEL006185-RB	5567577	exocyst complex component 4	99.0745	115.536	108.903	127.531	184.107	161.04	153.561	189.467	142.402	0.612206	0.13095	4.6751	2.94e-06	0.0001953	yes
424	AAEL009129-RB	5571544	probable cytochrome P450 6d4	1135.73	1253.72	1118.82	1173.47	1685.11	1841.18	1844.02	1810.7	1482.84	0.612084	0.0572795	10.6859	1.18e-26	3.38e-24	yes
175	AAEL003868-RA	5579179	DNA repair protein complementing XP-C cells homolog	106.324	131.93	122.259	104.594	178.83	177.524	149.69	204.538	146.961	0.609602	0.141168	4.31829	1.57e-05	0.000890391	yes
829	AAEL022286-RA	110676045	40S ribosomal protein S27	10016.2	8873.63	8542.7	10024.5	13947.6	14383.3	14486.3	14219.7	11811.7	0.606727	0.0649933	9.33523	1.01e-20	2.32e-18	yes
920	AAEL027465-RA	5575496	FACT complex subunit spt16	479.666	544.893	591.773	497.28	926.4	826.755	699.411	754.638	665.102	0.604398	0.113313	5.33387	9.61e-08	8.91e-06	yes
148	AAEL003293-RA	5577747	nucleolar GTP-binding protein 2	186.067	256.833	224.997	213.775	317.204	317.007	356.158	357.404	278.681	0.601295	0.114293	5.26098	1.43e-07	1.28e-05	yes
625	AAEL013134-RB	5577281	DNA-directed RNA polymerase I subunit RPA1	154.653	158.472	203.422	163.313	291.992	240.926	259.376	231.451	212.951	0.598949	0.131251	4.56338	5.03e-06	0.000320661	yes
411	AAEL008706-RA	5570983	U3 small nucleolar RNA-associated protein 14 homolog A	83.3676	114.755	109.93	116.521	169.449	167.38	135.495	171.166	133.508	0.595908	0.146074	4.07949	4.51e-05	0.00219064	yes
610	AAEL012851-RA	5576906	periodic tryptophan protein 1 homolog	142.571	137.394	157.19	152.303	231.6	201.617	215.501	233.604	183.973	0.592398	0.103621	5.71697	1.08e-08	1.18e-06	yes
473	AAEL009961-RA	5572697	complex III assembly factor LYRM7	74.91	67.1358	66.78	83.4917	94.9853	100.174	141.947	104.422	91.7308	0.583912	0.185968	3.13986	0.00169031	0.0409268	yes
673	AAEL014389-RA	5564286	activating signal cointegrator 1	225.938	334.898	242.463	244.97	396.358	388.017	433.583	360.633	328.358	0.583829	0.141022	4.13998	3.47e-05	0.00176589	yes
215	AAEL004500-RC	5564921	elongation factor 2	2537.27	1927.42	1842.1	2240.51	3229.5	2974.8	3654.49	2913.06	2664.89	0.579924	0.124727	4.64956	3.33e-06	0.000217556	yes
547	AAEL011369-RE	5574739	endothelin-converting enzyme homolog	339.511	332.556	324.653	312.864	481.376	470.439	505.847	498.427	408.209	0.578469	0.06688	8.64935	5.18e-18	1.07e-15	yes
583	AAEL012119-RA	5575846	nucleolin	170.36	235.756	223.97	228.455	294.337	330.956	356.158	308.96	268.619	0.574564	0.122679	4.68346	2.82e-06	0.000189854	yes
659	AAEL014063-RB	5579220	activating signal cointegrator 1 complex subunit 3	297.224	364.563	292.805	300.02	548.804	399.429	467.135	447.831	389.726	0.573291	0.12795	4.48059	7.44e-06	0.000455207	yes
284	AAEL006209-RA	5567596	exonuclease 1	53.1619	70.2584	57.5335	71.5643	91.4673	97.6382	81.2969	107.652	78.8215	0.57014	0.17501	3.25776	0.00112296	0.0297105	yes
14	AAEL000276-RA	5573755	protein mahjong	294.807	435.602	402.735	403.696	602.746	578.221	540.689	565.171	477.958	0.569948	0.121151	4.70445	2.55e-06	0.000174633	yes
64	AAEL001416-RA	5570540	inner nuclear membrane protein Man1	188.483	250.588	193.148	220.198	233.359	309.399	392.29	339.103	265.821	0.569747	0.181633	3.13681	0.00170798	0.0412148	yes
214	AAEL004493-RA	5564920	pre-rRNA-processing protein TSR1 homolog	349.177	330.214	353.42	317.452	487.826	507.212	429.712	571.631	418.33	0.567073	0.099877	5.67772	1.37e-08	1.45e-06	yes
450	AAEL009586-RB	5572175	uncharacterized LOC5572175	181.234	154.568	174.655	166.983	212.837	267.554	281.313	245.446	210.574	0.564362	0.122797	4.59589	4.31e-06	0.0002778	yes
303	AAEL006491-RA	5568063	GATOR complex protein WDR24	57.9948	67.9164	71.9169	55.0495	97.3306	83.6899	104.525	88.2744	78.3371	0.563402	0.166581	3.38216	0.000719193	0.0210295	yes
413	AAEL008728-RA	5571008	ATP-dependent RNA helicase DDX24	73.7018	103.826	83.2181	77.0692	133.097	150.895	109.686	107.652	104.893	0.562728	0.182668	3.08061	0.00206578	0.0475951	yes
418	AAEL008942-RA	5571317	probable rRNA-processing protein EBP2 homolog	93.0334	97.5811	96.5741	89.9141	144.237	128.071	134.204	147.483	116.387	0.561879	0.123329	4.55592	5.22e-06	0.000329307	yes
525	AAEL011135-RA	5574409	GPN-loop GTPase 3	93.0334	85.0907	83.2181	72.4818	114.334	133.143	129.043	117.34	103.461	0.559428	0.140224	3.98954	6.62e-05	0.00300211	yes
322	AAEL006917-RB	5568501	Golgi apparatus protein 1	172.776	165.498	206.504	212.858	248.603	332.224	308.412	231.451	234.791	0.558634	0.156668	3.56571	0.000362879	0.0122509	yes
391	AAEL008220-RA	5570258	ribosomal L1 domain-containing protein CG13096	135.321	157.691	154.108	133.036	174.14	232.049	251.633	204.538	180.315	0.556453	0.14861	3.74438	0.000180839	0.0069731	yes
481	AAEL010248-RB	5573067	rRNA 2'-O-methyltransferase fibrillarin	189.691	203.749	218.833	185.333	289.646	306.863	246.472	324.032	245.577	0.550117	0.111521	4.93285	8.1e-07	6.33e-05	yes
290	AAEL006370-RB	5567934	STAM-binding protein	82.1594	102.265	114.04	77.9867	138.96	148.359	143.237	122.723	116.216	0.549995	0.159111	3.45668	0.000546879	0.0171382	yes
18	AAEL000404-RA	5576340	TFIIH basal transcription factor complex helicase XPD subunit	111.157	124.123	132.533	138.541	189.384	145.823	172.917	231.451	155.741	0.54887	0.16401	3.34656	0.000818214	0.0232886	yes
352	AAEL007558-RA	5569380	SWI/SNF-related matrix-associated actin-dependent regulator of chromatin subfamily A containing DEAD/H box 1 homolog	364.884	477.757	451.022	393.604	662.552	636.551	629.728	541.488	519.698	0.547966	0.110911	4.94057	7.79e-07	6.11e-05	yes
717	AAEL018255-RB	5577197	serine/arginine repetitive matrix protein 2	114.781	142.078	138.697	100.007	195.834	182.596	183.241	162.554	152.473	0.547693	0.14571	3.75878	0.000170743	0.00669338	yes
650	AAEL013962-RB	5579029	DNA topoisomerase 2-binding protein 1-B	83.3676	71.039	97.6015	86.2441	137.201	102.71	134.204	115.187	103.444	0.547569	0.165597	3.30663	0.000944266	0.0262846	yes
212	AAEL004455-RA	5564872	ribosome production factor 2 homolog	86.9923	112.413	114.04	81.6567	137.201	142.019	162.594	139.947	122.108	0.546864	0.154185	3.5468	0.00038994	0.0130207	yes
182	AAEL003949-RA	5579658	WD repeat-containing protein 43	107.532	114.755	86.3003	103.676	151.273	155.968	166.465	131.335	127.163	0.545841	0.13843	3.94309	8.04e-05	0.00352135	yes
86	AAEL001917-RA	5573002	ribosome biogenesis protein BRX1 homolog	96.6581	96.0198	78.0812	88.0791	122.543	153.432	129.043	122.723	110.822	0.545678	0.142887	3.81894	0.000134027	0.00550503	yes
26	AAEL000674-RA	5565421	tRNA (uracil-5-)-methyltransferase homolog A	66.4524	83.5294	86.3003	89.9141	123.129	136.947	122.591	95.81	100.584	0.543731	0.166491	3.26582	0.00109147	0.0293489	yes
804	AAEL021056-RA	5563931	uncharacterized LOC5563931	259.769	156.13	164.382	174.323	267.366	291.647	260.666	274.512	231.099	0.543321	0.169676	3.20211	0.00136424	0.0344945	yes
903	AAEL026522-RA	5570807	RNA-binding protein 28	62.8277	64.7938	69.8621	73.3993	90.881	117.927	100.653	89.3509	83.7119	0.542936	0.161994	3.35159	0.000803501	0.0229922	yes
602	AAEL012582-RA	5576522	dimethyladenosine transferase 2, mitochondrial	55.5784	59.3293	53.424	56.8844	90.2947	78.6178	86.4586	71.0501	68.9547	0.541956	0.16929	3.20134	0.00136789	0.0345264	yes
653	AAEL013969-RD	5579032	syndecan	207.815	291.182	275.339	218.363	394.013	309.399	341.963	398.311	304.548	0.540515	0.147006	3.67682	0.000236163	0.00873028	yes
192	AAEL004068-RA	5564063	retinitis pigmentosa 1-like 1 protein	198.149	226.388	227.052	201.848	344.175	304.327	292.927	292.813	260.96	0.538733	0.100165	5.37848	7.51e-08	7.11e-06	yes
455	AAEL009645-RD	5580019	uncharacterized LOC5580019	3850.62	3652.65	3430.44	3607.57	5876.77	5302.9	4649.41	5267.4	4454.72	0.537912	0.080132	6.71283	1.91e-11	2.69e-09	yes
686	AAEL014733-RA	5565120	nuclear pore complex protein Nup214	289.974	296.646	259.928	296.35	456.75	388.017	331.64	474.744	349.256	0.535898	0.129018	4.15368	3.27e-05	0.00168332	yes
288	AAEL006227-RA	5567621	pentatricopeptide repeat-containing protein 1, mitochondrial	84.5758	88.2133	74.9991	95.4191	136.028	112.855	129.043	117.34	104.809	0.535259	0.142232	3.76327	0.000167704	0.00662274	yes
620	AAEL013061-RC	5577183	U6 snRNA-associated Sm-like protein LSm7	80.9511	67.1358	76.0265	60.5544	100.849	102.71	96.782	107.652	86.5826	0.530769	0.151544	3.50242	0.000461057	0.0149263	yes
133	AAEL002886-RB	5576472	thioredoxin reductase 1, mitochondrial	1366.5	1512.12	1482.52	1429.45	2242.71	1981.93	2089.2	2044.31	1768.59	0.530634	0.0580019	9.14856	5.77e-20	1.29e-17	yes
222	AAEL004686-RA	5565268	ruvB-like helicase 1	158.278	181.11	167.464	152.303	234.532	238.389	252.924	232.528	202.191	0.530608	0.0973445	5.45083	5.01e-08	4.97e-06	yes
208	AAEL004364-RA	5564655	WD repeat-containing protein 3	122.031	140.517	114.04	136.706	168.863	216.833	201.307	162.554	157.856	0.530222	0.140957	3.76159	0.000168834	0.00665511	yes
35	AAEL001007-RA	5567843	nuclear RNA export factor 1	546.118	525.377	536.295	511.042	817.929	727.849	687.798	809.541	645.243	0.529702	0.0755599	7.01036	2.38e-12	3.56e-10	yes
159	AAEL003661-RA	5578734	eukaryotic translation initiation factor 6	425.296	474.634	402.735	399.109	668.415	687.272	580.692	519.958	519.764	0.529668	0.11362	4.66173	3.14e-06	0.000206702	yes
797	AAEL020654-RA	5576932	folylpolyglutamate synthase, mitochondrial	343.136	393.447	401.707	367.914	540.595	545.253	503.266	584.549	459.983	0.526886	0.0780513	6.75051	1.47e-11	2.12e-09	yes
569	AAEL011830-RD	5575432	probable methylthioribulose-1-phosphate dehydratase	958.123	761.913	765.401	743.168	961.579	1160.25	1376.89	1150.8	984.764	0.525308	0.132693	3.95881	7.53e-05	0.00335883	yes
781	AAEL019880-RB	5574561	calcineurin-binding protein cabin-1	90.6169	113.975	103.766	84.4092	155.377	135.679	131.624	141.024	119.559	0.525143	0.143778	3.65246	0.000259744	0.00937532	yes
521	AAEL011052-RA	5574286	putative methyltransferase C9orf114	84.5758	80.4068	72.9443	87.1616	103.78	122.999	120.01	124.876	99.5942	0.523126	0.143275	3.6512	0.000261016	0.00939328	yes
463	AAEL009772-RD	5572383	probable nuclear transport factor 2	209.023	175.646	199.313	150.469	236.877	318.275	230.986	266.976	223.446	0.520376	0.151874	3.42636	0.000611733	0.0185724	yes
65	AAEL001421-RC	5570534	vigilin	2173.6	2826.73	3124.28	2832.29	4789.72	3575.84	3841.6	3484.69	3331.09	0.518455	0.14449	3.58818	0.000332997	0.0115331	yes
40	AAEL001062-RB	5568348	uncharacterized LOC5568348	209.023	205.311	239.381	201.848	392.84	286.575	251.633	285.277	258.986	0.518332	0.158395	3.2724	0.00106638	0.0289416	yes
885	AAEL025533-RA	5567829	tubulin--tyrosine ligase-like protein 12	93.0334	121.001	86.3003	94.5016	120.784	140.751	160.013	150.712	120.887	0.515991	0.164572	3.13536	0.00171644	0.0413259	yes
445	AAEL009424-RA	5571936	serine/threonine-protein kinase RIO3	1338.71	1780.66	1325.33	1543.22	2245.64	1973.05	2383.42	1965.72	1819.47	0.515851	0.119358	4.32187	1.55e-05	0.000885419	yes
112	AAEL002488-RA	5574815	ATP-dependent RNA helicase Ddx1	260.977	367.686	283.558	344.059	510.693	426.058	496.814	364.939	381.848	0.515647	0.156008	3.30527	0.000948856	0.0263757	yes
205	AAEL004332-RC	5564592	WD repeat-containing protein 19	90.6169	85.8713	85.2729	91.7491	128.406	128.071	144.528	103.346	107.233	0.511097	0.144063	3.54774	0.000388546	0.0129944	yes
842	AAEL023151-RA	5572345	CCAAT/enhancer-binding protein zeta	167.943	172.523	182.874	166.983	234.532	254.874	220.663	273.435	209.229	0.508296	0.102103	4.97825	6.42e-07	5.12e-05	yes
456	AAEL009662-RB	5572221	uncharacterized LOC5572221	78.5347	92.8972	118.149	99.089	147.169	135.679	141.947	127.029	117.562	0.50684	0.148238	3.41909	0.00062832	0.0189683	yes
238	AAEL004997-RA	5565756	probable ribosome production factor 1	82.1594	115.536	96.5741	96.3365	151.859	154.7	126.462	123.799	118.428	0.506541	0.155222	3.26334	0.00110108	0.0294898	yes
628	AAEL013182-RA	5577436	putative ATP-dependent RNA helicase DHX57	437.378	499.615	383.214	429.386	669.588	620.066	609.081	578.09	528.302	0.501503	0.097056	5.16715	2.38e-07	2.02e-05	yes
698	AAEL015356-RA	5579474	nuclear envelope integral membrane protein 1	99.0745	119.439	108.903	117.439	157.136	166.112	144.528	165.784	134.802	0.501339	0.11844	4.23285	2.31e-05	0.00124719	yes
387	AAEL008105-RE	5570136	glutamate--cysteine ligase	704.396	812.655	830.127	781.702	1113.44	1057.54	1175.58	1086.21	945.205	0.499667	0.0664171	7.52318	5.35e-14	8.87e-12	yes
136	AAEL002988-RA	5580265	chromatin target of PRMT1 protein	300.848	328.653	341.092	305.524	479.031	422.254	477.458	419.842	384.338	0.497612	0.0840521	5.92028	3.21e-09	3.64e-07	yes
19	AAEL000436-RA	5577326	SET and MYND domain-containing protein 5	103.907	117.878	129.45	86.2441	145.996	154.7	166.465	152.865	132.188	0.496845	0.147914	3.35901	0.00078221	0.022473	yes
660	AAEL014169-RA	5563838	U6 snRNA-associated Sm-like protein LSm5	65.2442	60.8906	65.7526	59.6369	83.845	95.1022	82.5873	93.657	75.8395	0.496038	0.154815	3.20406	0.00135503	0.0343772	yes
327	AAEL007029-RI	5568680	tropomodulin	91.8252	103.046	114.04	99.089	135.442	172.452	125.171	145.33	123.299	0.495012	0.143807	3.44221	0.000576985	0.0177831	yes
921	AAEL027479-RA	5572762	glutamate-rich WD repeat-containing protein 1	101.491	132.71	123.286	119.274	188.798	164.844	158.723	158.248	143.422	0.494866	0.130399	3.79503	0.000147628	0.00595073	yes
586	AAEL012185-RA	5575941	ribosome biogenesis regulatory protein homolog	143.779	138.175	115.067	132.119	199.352	183.864	218.082	142.1	159.067	0.49139	0.157623	3.1175	0.00182389	0.043328	yes
2	AAEL000046-RA	5563647	nucleolar protein 12	117.198	130.368	109.93	123.861	155.377	188.936	162.594	176.549	145.602	0.48979	0.121239	4.03987	5.35e-05	0.00250348	yes
526	AAEL011140-RA	5574423	secreted 45 kDa protein	360.051	305.234	325.681	376.171	527.11	428.594	517.461	434.913	409.402	0.486854	0.1114	4.37032	1.24e-05	0.000725525	yes
427	AAEL009171-RB	5571582	protein CREBRF homolog	456.709	403.595	475.679	329.379	575.775	516.088	637.471	598.544	499.155	0.48551	0.13022	3.72838	0.000192717	0.00732665	yes
410	AAEL008696-RA	5570959	mothers against decapentaplegic homolog 3	341.928	373.931	394.516	360.574	551.149	484.387	529.075	485.509	440.134	0.482528	0.0791291	6.09798	1.07e-09	1.28e-07	yes
651	AAEL013968-RA	5579023	tRNA (cytosine(34)-C(5))-methyltransferase	222.314	240.44	220.888	207.353	341.243	295.451	295.508	304.654	265.981	0.481597	0.0947757	5.08144	3.75e-07	3.14e-05	yes
477	AAEL010118-RA	5572907	kelch domain-containing protein 4	108.74	91.3359	87.3277	84.4092	135.442	125.535	147.109	106.575	110.809	0.476743	0.153796	3.09984	0.00193625	0.04543	yes
240	AAEL005041-RA	5565845	ribosome biogenesis protein WDR12 homolog	111.157	160.033	154.108	146.799	206.974	202.885	193.564	195.926	171.431	0.474564	0.124939	3.79837	0.000145651	0.00588212	yes
543	AAEL011282-RA	5574643	25S rRNA (cytosine-C(5))-methyltransferase nop2	201.774	192.82	201.367	206.435	306.65	225.709	273.57	299.272	238.45	0.473015	0.115629	4.09079	4.3e-05	0.00210562	yes
436	AAEL009308-RA	5571791	WD repeat-containing protein 36	126.864	113.975	123.286	146.799	178.83	178.792	161.303	186.237	152.011	0.470487	0.119793	3.92751	8.58e-05	0.00373392	yes
226	AAEL004743-RO	5565387	multidrug resistance-associated protein 1	137.738	167.059	160.272	204.6	237.463	220.637	229.696	241.14	199.826	0.46765	0.127904	3.65625	0.000255928	0.00926883	yes
567	AAEL011827-RA	5575423	nucleolar complex protein 3 homolog	177.609	159.252	149.998	157.808	206.974	207.957	261.957	213.15	191.838	0.46055	0.116449	3.95495	7.66e-05	0.00339941	yes
466	AAEL009859-RA	5572534	nucleolar GTP-binding protein 1	2212.26	2176.45	2093.81	2191.89	2935.16	3107.94	2832.49	3060.54	2576.32	0.460195	0.0430566	10.6881	1.16e-26	3.35e-24	yes
915	AAEL027116-RA	5573621	DNA-directed RNA polymerase III subunit RPC1	176.401	171.743	178.765	165.148	251.535	243.462	214.211	234.681	204.493	0.459429	0.0959615	4.78764	1.69e-06	0.000123279	yes
261	AAEL005628-RB	5566773	RNA-binding protein NOB1	279.1	325.53	296.914	293.597	405.74	419.718	412.937	414.459	355.999	0.458609	0.0742548	6.17616	6.57e-10	8.13e-08	yes
513	AAEL010898-RA	5574050	transmembrane protein 235	343.136	292.743	338.009	255.98	449.714	365.192	393.58	472.591	363.868	0.458372	0.130595	3.50987	0.000448319	0.0145612	yes
97	AAEL002113-RA	5573603	3-oxoacyl-[acyl-carrier-protein] synthase, mitochondrial	142.571	146.762	158.217	149.551	202.283	233.317	181.95	203.462	177.264	0.457146	0.108311	4.22068	2.44e-05	0.00130335	yes
499	AAEL010588-RA	5573546	pleiotropic regulator 1	82.1594	80.4068	77.0538	69.7293	115.507	100.174	99.3629	104.422	91.1019	0.455729	0.144272	3.15882	0.00158408	0.038972	yes
433	AAEL009285-RA	5571766	ATP-dependent RNA helicase DDX54	209.023	218.582	189.039	196.343	265.021	318.275	220.663	312.19	241.142	0.455355	0.134558	3.38408	0.000714179	0.0209115	yes
519	AAEL011049-RA	5574288	condensin complex subunit 3	181.234	173.304	141.779	182.581	236.877	220.637	233.567	237.91	200.986	0.454805	0.105296	4.31931	1.57e-05	0.000888625	yes
644	AAEL013631-RA	5578308	guanine nucleotide-binding protein-like 1	590.822	618.274	506.501	572.514	780.99	731.653	871.038	753.562	678.169	0.453247	0.0869592	5.21218	1.87e-07	1.62e-05	yes
562	AAEL011752-RA	110678069	glutathione S-transferase 1	531.619	437.944	469.515	496.363	692.454	595.974	713.606	635.145	571.577	0.451953	0.0895617	5.04628	4.51e-07	3.69e-05	yes
720	AAEL018293-RE	5575159	cysteine/serine-rich nuclear protein 1	270.643	236.537	252.737	255.98	354.143	389.285	312.283	327.261	299.858	0.450748	0.0945984	4.76486	1.89e-06	0.0001362	yes
406	AAEL008643-RA	5570876	CWF19-like protein 1 homolog	153.445	153.007	148.971	142.211	189.384	205.421	214.211	213.15	177.475	0.450034	0.101474	4.43498	9.21e-06	0.000553725	yes
92	AAEL001982-RA	5573183	KDEL motif-containing protein 1	100.283	89.7746	106.848	112.851	136.028	145.823	135.495	142.1	121.15	0.450033	0.125751	3.57877	0.000345221	0.0118605	yes
138	AAEL003071-RA	5576975	pseudouridylate synthase 7 homolog	325.013	421.55	391.433	372.501	541.768	511.016	514.88	500.58	447.343	0.449927	0.0886535	5.07512	3.87e-07	3.21e-05	yes
160	AAEL003664-RB	5578794	la protein homolog	177.609	219.362	219.86	200.931	309.582	261.214	298.089	245.446	241.512	0.447424	0.11826	3.78341	0.000154696	0.00614665	yes
346	AAEL007385-RF	5569124	ferritin subunit	15320.3	16940.9	12845.4	17687.4	23375.8	21519.7	20853.3	19605.5	18518.5	0.442837	0.112608	3.93254	8.41e-05	0.00366412	yes
572	AAEL011960-RA	5575632	RRP12-like protein	246.478	319.285	318.489	250.475	389.909	357.584	401.323	396.158	334.963	0.441963	0.113567	3.89165	9.96e-05	0.00422831	yes
500	AAEL010598-RA	5573561	regulator of nonsense transcripts 2	154.653	123.342	160.272	146.799	221.046	191.472	194.854	177.625	171.258	0.440545	0.12955	3.40059	0.000672413	0.0198789	yes
339	AAEL007289-RA	5568987	surfeit locus protein 6 homolog	140.154	158.472	128.423	123.861	176.485	197.813	201.307	178.702	163.152	0.440414	0.12152	3.6242	0.000289853	0.0102376	yes
415	AAEL008806-RA	5571076	KAT8 regulatory NSL complex subunit 3	563.033	558.164	571.226	614.719	864.249	817.879	651.666	786.934	678.484	0.43977	0.0971447	4.52695	5.98e-06	0.000373417	yes
849	AAEL023529-RA	5563826	angio-associated migratory cell protein	126.864	146.762	127.396	132.119	193.489	161.04	184.531	181.931	156.766	0.438433	0.113702	3.85598	0.000115266	0.00479059	yes
42	AAEL001101-RA	5568586	ATP-binding cassette sub-family F member 1	497.789	740.836	629.787	591.782	979.756	819.147	776.837	753.562	723.687	0.436426	0.141442	3.08554	0.00203181	0.0470151	yes
132	AAEL002886-RA	5576472	thioredoxin reductase 1, mitochondrial	576.324	548.796	489.035	425.716	672.519	754.477	752.319	580.243	599.929	0.435269	0.128116	3.39747	0.000680119	0.0200513	yes
471	AAEL009912-RA	5572599	protein penguin	155.861	143.639	170.546	133.036	212.251	195.276	203.887	197.003	176.438	0.434231	0.110001	3.94751	7.9e-05	0.00347781	yes
444	AAEL009416-RA	5571933	PHD finger protein 20-like protein 1	531.619	712.732	534.24	544.072	861.317	716.436	852.972	708.348	682.717	0.433452	0.128901	3.36268	0.000771888	0.0222063	yes
718	AAEL018259-RB	5577674	DNA repair protein complementing XP-C cells homolog	195.733	233.414	239.381	195.426	306.064	273.894	310.993	274.512	253.677	0.431178	0.105902	4.07148	4.67e-05	0.00224691	yes
333	AAEL007158-RC	5568848	ribosomal RNA processing protein 1 homolog	320.18	299.769	266.093	313.782	371.733	412.109	402.613	435.989	352.784	0.430449	0.0904653	4.75816	1.95e-06	0.000139507	yes
571	AAEL011958-RB	5575628	something about silencing protein 10	125.655	178.769	158.217	151.386	219.287	228.245	187.112	193.773	180.306	0.426386	0.134547	3.16906	0.00152935	0.0378431	yes
149	AAEL003336-RA	5577915	tRNA-splicing ligase RtcB homolog	250.103	314.601	270.202	294.515	400.463	388.017	388.418	345.562	331.485	0.426008	0.0968589	4.39823	1.09e-05	0.000645295	yes
299	AAEL006469-RA	5568030	RNA cytidine acetyltransferase	196.941	163.156	186.984	165.148	231.6	216.833	255.505	248.675	208.105	0.42584	0.105431	4.03902	5.37e-05	0.00250348	yes
263	AAEL005721-RA	5566956	zinc finger MYND domain-containing protein 11	181.234	174.865	172.601	135.789	245.672	224.441	221.953	194.85	193.926	0.425307	0.129683	3.27959	0.00103959	0.0283097	yes
675	AAEL014437-RA	5564430	uncharacterized LOC5564430	199.357	170.181	204.45	182.581	231.014	237.121	274.861	272.359	221.49	0.423343	0.109938	3.85074	0.000117761	0.0048848	yes
916	AAEL027140-RA	110680319	protein Peter pan-like	100.283	113.975	125.341	112.851	142.478	155.968	171.627	142.1	133.078	0.421366	0.126288	3.33654	0.000848278	0.0240166	yes
95	AAEL002098-RA	5573608	DNA repair endonuclease XPF	155.861	192.04	190.066	170.653	226.909	259.946	236.148	234.681	208.288	0.421023	0.10364	4.06238	4.86e-05	0.0023156	yes
926	AAEL027731-RA	5568603	beclin 1-associated autophagy-related key regulator	247.686	238.878	235.271	260.567	280.852	356.316	307.122	376.781	287.934	0.420495	0.117163	3.58899	0.000331966	0.0115161	yes
161	AAEL003666-RA	5578759	leukotriene A-4 hydrolase	379.383	455.899	477.734	377.089	569.325	594.706	581.983	518.881	494.375	0.419389	0.101515	4.13131	3.61e-05	0.00180805	yes
1	AAEL000001-RA	5563588	bystin	159.486	182.672	175.683	162.396	223.391	210.493	214.211	261.594	198.741	0.417	0.10937	3.81275	0.00013743	0.00560294	yes
435	AAEL009302-RA	5571757	protein CLP1 homolog	142.571	138.955	142.806	113.769	163.586	178.792	185.821	192.697	157.375	0.416324	0.121739	3.41982	0.000626633	0.0189683	yes
574	AAEL012069-RC	5575813	probable phospholipid hydroperoxide glutathione peroxidase	349.177	373.931	344.174	423.881	442.092	578.221	541.979	435.989	436.181	0.415529	0.12627	3.29081	0.000999007	0.027449	yes
354	AAEL007586-RA	5579966	nuclear pore complex protein Nup98-Nup96	877.172	828.268	846.565	843.174	1262.37	1148.83	1019.44	1079.75	988.195	0.41517	0.0771335	5.38249	7.35e-08	6.99e-06	yes
131	AAEL002867-RA	5576349	phenylalanine--tRNA ligase alpha subunit	412.005	386.421	389.379	354.151	454.991	519.892	570.369	514.575	450.223	0.41226	0.0924457	4.45948	8.22e-06	0.000499577	yes
895	AAEL026210-RA	110679632	neuralized-like protein 4	209.023	214.678	267.12	225.703	302.546	311.935	283.894	319.726	266.828	0.411685	0.100381	4.10123	4.11e-05	0.00203614	yes
603	AAEL012618-RA	5576560	RNA-binding protein 34	172.776	183.452	165.409	170.653	221.632	245.998	214.211	243.293	202.178	0.41087	0.0965903	4.25374	2.1e-05	0.00114792	yes
129	AAEL002818-RB	5576097	splicing factor U2AF 50 kDa subunit	610.154	530.841	545.541	557.834	725.289	784.91	727.801	739.567	652.742	0.409808	0.0634988	6.45378	1.09e-10	1.45e-08	yes
893	AAEL026104-RA	5572664	nuclear pore complex protein Nup155	128.072	138.175	157.19	121.109	195.834	180.06	183.241	160.401	158.01	0.408323	0.125857	3.24433	0.00117728	0.0308049	yes
706	AAEL017421-RA	23687841	nucleolar protein 56	362.468	416.866	432.529	414.706	565.807	545.253	567.788	476.897	472.789	0.404632	0.0877738	4.60995	4.03e-06	0.00026045	yes
332	AAEL007137-RB	5568786	erythroid differentiation-related factor 1	259.769	266.982	267.12	259.65	385.218	303.059	375.514	322.955	305.033	0.403438	0.100487	4.01485	5.95e-05	0.00272048	yes
438	AAEL009326-RD	5571798	synaptic functional regulator FMR1	163.11	234.195	216.778	181.663	250.362	289.111	260.666	259.441	231.916	0.402444	0.131155	3.06846	0.00215162	0.0491497	yes
245	AAEL005190-RA	5566137	39S ribosomal protein L42, mitochondrial	340.72	274.008	284.586	319.287	361.765	455.222	385.838	409.077	353.813	0.401962	0.109337	3.67635	0.000236592	0.00873104	yes
414	AAEL008741-RA	5570999	exportin-2	157.069	147.543	141.779	145.881	198.179	209.225	166.465	203.462	171.2	0.399137	0.108347	3.68388	0.000229712	0.00861077	yes
704	AAEL017357-RC	23687777	E3 ubiquitin-protein ligase TRIP12	292.391	269.324	321.571	312.864	411.017	343.636	393.58	420.918	345.663	0.398809	0.0970121	4.11092	3.94e-05	0.00196166	yes
344	AAEL007383-RF	5569122	soma ferritin	7371.39	7169.48	5990.68	7620.68	9463.35	9208.43	9611.1	8830.67	8158.22	0.398678	0.0830367	4.80123	1.58e-06	0.000115989	yes
654	AAEL014037-RA	5579196	WD repeat-containing protein 18	135.321	135.052	129.45	116.521	167.104	168.648	160.013	184.084	149.524	0.398399	0.111161	3.58397	0.000338407	0.0116827	yes
929	AAEL027821-RA	5571980	ubiquitin carboxyl-terminal hydrolase MINDY-3 homolog	438.586	424.673	489.035	365.161	555.254	565.541	538.108	600.697	497.132	0.397885	0.0972132	4.09291	4.26e-05	0.00209603	yes
761	AAEL019792-RA	5580319	general transcription factor IIH subunit 5	194.524	175.646	201.367	188.086	226.909	263.75	283.894	229.298	220.434	0.394587	0.110762	3.56249	0.000367348	0.0123822	yes
559	AAEL011693-RA	5575234	exosome complex exonuclease RRP44	128.072	126.465	121.231	128.449	176.485	167.38	136.785	176.549	145.177	0.393955	0.120791	3.26145	0.00110842	0.0295083	yes
570	AAEL011892-RA	5575514	guanine nucleotide-binding protein subunit beta-like protein 1	401.131	298.988	355.475	337.637	425.675	488.191	431.003	481.203	402.413	0.393567	0.107114	3.67428	0.000238519	0.00875686	yes
255	AAEL005426-RA	5566468	annexin B10	1628.69	1313.05	1478.41	1406.51	1770.71	1932.48	2198.89	1745.03	1684.22	0.392114	0.101221	3.87383	0.000107138	0.00450528	yes
664	AAEL014253-RB	5563760	protein-glutamate O-methyltransferase	198.149	156.91	167.464	156.891	214.596	202.885	225.825	243.293	195.752	0.392006	0.114091	3.4359	0.000590584	0.0180842	yes
193	AAEL004075-RA	5564074	probable RNA-binding protein 19	154.653	159.252	160.272	152.303	185.866	174.988	230.986	231.451	181.222	0.387272	0.125435	3.08742	0.002019	0.0468705	yes
88	AAEL001939-RB	5572990	uncharacterized LOC5572990	177.609	182.672	173.628	143.129	221.632	230.781	229.696	202.385	195.192	0.384316	0.11047	3.47892	0.000503439	0.0159948	yes
253	AAEL005355-RA	5566398	U6 snRNA-associated Sm-like protein LSm4	167.943	189.698	160.272	166.066	209.906	201.617	254.214	230.375	197.511	0.378909	0.113193	3.34746	0.000815566	0.0232525	yes
420	AAEL009067-RA	5571427	superkiller viralicidic activity 2-like 2	152.236	135.833	123.286	131.201	182.935	167.38	197.435	155.018	155.666	0.378583	0.122385	3.09338	0.00197892	0.0461906	yes
343	AAEL007383-RE	5569122	soma ferritin	6161.95	6072.67	5232.47	7004.13	8140	8067.2	7883.22	7592.68	7019.29	0.372596	0.089939	4.14277	3.43e-05	0.00175142	yes
524	AAEL011114-RA	5574394	serine/threonine-protein kinase rio2	140.154	183.452	152.053	180.746	224.564	226.977	198.726	202.385	188.632	0.371613	0.121024	3.07059	0.00213638	0.0490108	yes
47	AAEL001171-RA	5568803	tRNA-dihydrouridine(47) synthase [NAD(P)(+)]-like	190.9	197.504	204.45	216.528	279.093	263.75	233.567	264.823	231.327	0.371413	0.0948823	3.91446	9.06e-05	0.00390999	yes
250	AAEL005271-RB	5566229	rab11 family-interacting protein 5	322.596	327.872	349.311	287.175	381.7	452.686	449.069	384.317	369.341	0.367602	0.0998986	3.67975	0.000233462	0.00866698	yes
881	AAEL025202-RA	5576060	apoptosis inhibitor 5 homolog	573.907	603.441	555.815	512.877	763.4	705.024	738.124	685.741	642.291	0.367241	0.0723592	5.07525	3.87e-07	3.21e-05	yes
897	AAEL026227-RA	5576059	uncharacterized LOC5576059	310.514	295.085	314.38	292.68	440.333	338.564	370.353	400.464	345.297	0.366129	0.0999571	3.66286	0.000249412	0.00910607	yes
613	AAEL012932-RA	5577025	methyltransferase-like protein 6	177.609	174.085	206.504	180.746	223.391	249.802	246.472	236.834	211.93	0.365595	0.0983399	3.71767	0.000201069	0.00761714	yes
552	AAEL011471-RE	5574866	60S ribosomal protein L17	360.051	391.105	402.735	333.049	408.671	535.108	500.686	477.974	426.172	0.362888	0.110628	3.28026	0.00103713	0.0282787	yes
448	AAEL009475-RB	5572005	CAD protein	529.203	559.725	605.129	585.359	795.062	687.272	771.675	670.67	650.512	0.36225	0.082109	4.41182	1.03e-05	0.000609461	yes
93	AAEL002012-RB	5573171	phosphorylated adapter RNA export protein	254.936	290.401	290.75	243.135	356.488	304.327	371.643	350.945	307.828	0.358468	0.10022	3.57683	0.000347786	0.011928	yes
472	AAEL009946-RA	5572627	dnaJ homolog shv	1580.36	1605.79	1447.58	1442.3	1887.98	1898.24	1958.87	2048.61	1733.72	0.358237	0.0565749	6.33208	2.42e-10	3.1e-08	yes
464	AAEL009839-RA	5572517	nuclear cap-binding protein subunit 1	229.563	188.917	219.86	205.518	269.711	275.162	285.184	246.522	240.055	0.35735	0.0970022	3.68394	0.000229656	0.00861077	yes
468	AAEL009882-RD	5572564	probable histone-binding protein Caf1	173.985	201.407	238.353	221.115	262.675	272.626	286.475	251.905	238.568	0.356265	0.111169	3.20473	0.00135191	0.0343662	yes
126	AAEL002784-RA	5576111	zinc finger protein ZPR1	135.321	138.955	137.67	133.036	161.24	176.256	183.241	180.855	155.822	0.351656	0.106442	3.30374	0.000954057	0.0264859	yes
178	AAEL003916-RA	5563713	glycine-rich RNA-binding protein GRP2A	390.257	366.905	354.448	324.792	477.858	480.583	381.966	479.05	406.982	0.346989	0.101655	3.4134	0.000641575	0.0192329	yes
388	AAEL008135-RA	5570156	conserved oligomeric Golgi complex subunit 3	236.812	269.324	207.532	250.475	314.859	315.739	299.379	299.272	274.174	0.34639	0.0973031	3.5599	0.00037099	0.0124853	yes
150	AAEL003385-RA	5577997	zinc finger protein 622	744.267	829.829	734.58	860.606	1010.24	1062.61	975.563	986.09	900.474	0.345028	0.0696758	4.95191	7.35e-07	5.83e-05	yes
712	AAEL018144-RA	5569504	tribbles homolog 2	337.095	327.872	362.667	319.287	471.408	382.945	409.065	433.836	380.522	0.344638	0.0908757	3.79241	0.000149195	0.00598049	yes
575	AAEL012076-RA	5575807	ubiquitin-associated protein 1	192.108	185.794	191.094	190.838	233.359	244.73	243.891	245.446	215.907	0.344601	0.0867496	3.97237	7.12e-05	0.00318652	yes
814	AAEL021578-RA	5569598	zinc finger protein 706	281.517	288.059	287.668	234.878	306.65	370.265	375.514	340.179	310.591	0.342684	0.108937	3.14571	0.00165682	0.0403442	yes
12	AAEL000199-RA	5570018	probable arginine--tRNA ligase, cytoplasmic	316.555	393.447	338.009	390.851	463.786	429.862	490.362	446.755	408.703	0.341747	0.0938666	3.64078	0.000271816	0.00966435	yes
330	AAEL007077-RA	5568725	cysteine and histidine-rich domain-containing protein	207.815	224.827	196.23	225.703	274.402	261.214	254.214	292.813	242.152	0.340791	0.0919644	3.70569	0.000210817	0.00794423	yes
100	AAEL002157-RB	5580052	ribonuclease P protein subunit p40	343.136	316.163	288.695	264.237	395.186	394.357	330.349	408	342.515	0.339708	0.110006	3.08809	0.00201445	0.0468157	yes
859	AAEL024070-RA	110681523	small nuclear ribonucleoprotein F	146.195	177.988	159.245	166.066	206.388	220.637	205.178	193.773	184.434	0.335899	0.102748	3.26916	0.00107867	0.0291514	yes
680	AAEL014523-RB	5564601	neuroendocrine convertase 2	657.275	740.836	794.168	774.362	897.67	901.569	1016.86	933.34	839.51	0.333601	0.0771568	4.32368	1.53e-05	0.000882918	yes
898	AAEL026253-RB	5580025	ectopic P granules protein 5 homolog	419.254	519.131	468.487	516.547	619.75	588.366	600.048	622.227	544.226	0.333565	0.0806919	4.13381	3.57e-05	0.00179693	yes
851	AAEL023603-RA	5579467	histone H2A.V	874.756	968.785	976.015	897.306	1355.59	1165.32	1029.76	1119.58	1048.39	0.33241	0.0963653	3.44948	0.000561677	0.0174234	yes
185	AAEL003976-RA	5579796	RNA polymerase-associated protein Rtf1	1963.37	1946.16	1889.36	1904.71	2372.29	2593.12	2286.64	2445.85	2175.19	0.331431	0.0481032	6.88999	5.58e-12	8.24e-10	yes
48	AAEL001176-RB	5568820	S-adenosylmethionine decarboxylase proenzyme	1884.83	2036.71	2168.81	2259.78	2747.54	2560.15	2604.08	2572.88	2354.35	0.328594	0.0659281	4.98413	6.22e-07	4.99e-05	yes
614	AAEL012942-RA	5577027	nuclear speckle splicing regulatory protein 1	163.11	181.11	167.464	161.478	197.007	218.101	202.597	233.604	190.559	0.32781	0.103883	3.15556	0.0016019	0.0392875	yes
79	AAEL001716-RC	5572056	THO complex subunit 2	289.974	299.769	324.653	311.947	388.15	427.326	352.287	371.398	345.688	0.327313	0.0833809	3.92552	8.65e-05	0.00375739	yes
179	AAEL003924-RA	5563787	pollen-specific leucine-rich repeat extensin-like protein 1	664.524	672.138	721.224	664.263	910.569	924.393	709.735	859.061	765.738	0.325287	0.0933564	3.48436	0.000493322	0.0157834	yes
606	AAEL012750-RA	5576764	general transcription factor IIH subunit 1	559.409	647.158	686.293	544.072	776.886	727.849	735.543	811.694	686.113	0.324876	0.092451	3.51404	0.000441354	0.0143786	yes
442	AAEL009398-RA	5571906	syntaxin-7	416.838	431.699	447.94	454.158	527.696	537.644	592.306	533.952	492.779	0.317207	0.0667708	4.75069	2.03e-06	0.000144159	yes
251	AAEL005341-RA	5566328	protein hook	291.182	260.737	242.463	256.897	319.549	343.636	298.089	345.562	294.764	0.316913	0.0892806	3.54962	0.00038578	0.0129221	yes
199	AAEL004237-RA	5564402	vacuolar protein sorting-associated protein 18 homolog	240.437	267.762	247.6	289.927	314.859	320.811	358.739	316.496	294.579	0.315653	0.0915401	3.44825	0.000564229	0.0174533	yes
836	AAEL022680-RA	5564999	N-acetylgalactosaminyltransferase 7	302.056	318.505	291.777	333.049	382.286	332.224	410.356	423.071	349.166	0.312082	0.0960274	3.24992	0.00115437	0.0302796	yes
507	AAEL010777-RA	5573851	thioredoxin-2	5661.75	5146.04	5095.83	5760.93	6029.22	7032.49	7253.49	6514.01	6061.72	0.307919	0.0782811	3.93351	8.37e-05	0.00365676	yes
616	AAEL012980-RA	5577080	pescadillo homolog	476.041	510.544	476.706	561.504	593.951	632.747	614.243	674.976	567.589	0.307873	0.0791419	3.89014	0.000100187	0.00423797	yes
134	AAEL002895-RA	5576461	phosphoinositide 3-kinase regulatory subunit 4	207.815	211.556	190.066	188.086	224.564	252.338	247.762	269.129	223.914	0.307539	0.100171	3.07015	0.00213954	0.0490307	yes
59	AAEL001339-RA	5570065	RNA polymerase II-associated factor 1 homolog	477.249	499.615	528.076	471.59	589.261	644.159	587.144	631.916	553.626	0.307373	0.0664685	4.62433	3.76e-06	0.000244489	yes
278	AAEL006129-RA	5567528	deoxyhypusine hydroxylase	461.542	468.389	454.104	391.769	547.631	537.644	540.689	560.865	495.329	0.301875	0.0737651	4.09238	4.27e-05	0.00209603	yes
264	AAEL005744-RA	5566976	probable ATP-dependent RNA helicase pitchoune	460.334	470.731	474.652	490.858	554.667	608.654	536.818	642.681	529.924	0.301583	0.0756301	3.98761	6.67e-05	0.00301756	yes
806	AAEL021176-RA	5567828	transmembrane protein 179	675.398	572.215	605.129	586.277	721.771	757.013	736.834	756.792	676.429	0.288423	0.0662194	4.35557	1.33e-05	0.000769852	yes
780	AAEL019877-RA	110679564	activating signal cointegrator 1 complex subunit 2-like	259.769	238.878	224.997	243.135	293.751	268.822	304.541	308.96	267.857	0.286845	0.0856926	3.34737	0.00081583	0.0232525	yes
682	AAEL014527-RB	5564607	probable sodium/potassium/calcium exchanger CG1090	827.635	873.546	889.715	934.006	1120.47	995.403	1094.28	1075.44	976.313	0.283541	0.060592	4.67952	2.88e-06	0.000192337	yes
404	AAEL008624-RE	5570848	ATP-binding cassette sub-family G member 1	416.838	418.428	459.241	428.468	530.041	507.212	534.237	522.111	477.072	0.283498	0.0627738	4.51618	6.3e-06	0.000389505	yes
847	AAEL023347-RA	110681498	eukaryotic translation initiation factor 3 subunit D	850.591	868.862	878.414	951.438	1150.38	1038.52	970.401	1150.8	982.424	0.283298	0.075856	3.73468	0.000187953	0.00718385	yes
78	AAEL001715-RA	5572071	T-complex protein 1 subunit epsilon	801.054	804.849	1000.67	831.247	1031.94	1025.84	1010.4	1093.74	949.968	0.276447	0.0849609	3.25381	0.00113867	0.029978	yes
384	AAEL008099-RA	5570134	procollagen-lysine,2-oxoglutarate 5-dioxygenase 3	412.005	462.925	457.186	506.455	582.225	564.273	566.497	510.269	507.729	0.272551	0.0822554	3.31347	0.000921458	0.0257816	yes
505	AAEL010698-RB	5573704	importin-4	850.591	900.869	962.659	890.884	1106.99	1062.61	1202.68	972.095	993.672	0.268137	0.0781309	3.43189	0.000599395	0.0183278	yes
234	AAEL004920-RA	5565683	HEAT repeat-containing protein 3	323.805	335.679	342.119	313.782	388.15	398.161	433.583	364.939	362.527	0.263418	0.0780143	3.37653	0.00073406	0.0213766	yes
102	AAEL002207-RA	5573956	bis(5'-nucleosyl)-tetraphosphatase [asymmetrical]	442.211	420.77	422.255	481.683	555.254	559.201	486.491	513.499	485.17	0.263333	0.0786689	3.34736	0.000815858	0.0232525	yes
311	AAEL006713-RA	5568279	splicing factor U2af 38 kDa subunit	322.596	316.943	354.448	307.359	373.492	403.233	405.194	382.164	358.179	0.26097	0.0767531	3.40013	0.000673545	0.0198849	yes
295	AAEL006439-RB	5568002	dual specificity protein phosphatase 3	2927.53	2652.64	2617.78	2455.21	2980.31	3111.74	3171.87	3498.68	2926.97	0.260748	0.0756572	3.44644	0.000568035	0.0175443	yes
195	AAEL004212-RA	5564341	leucine-rich repeat-containing protein 20	518.329	482.441	471.569	433.973	542.941	589.634	583.273	569.478	523.955	0.259757	0.0721629	3.59959	0.000318717	0.011165	yes
198	AAEL004227-RD	5564399	myosin heavy chain 95F	1006.45	1120.23	1046.9	1197.33	1264.71	1361.86	1280.1	1312.27	1198.73	0.252109	0.066168	3.81014	0.000138889	0.00564096	yes
503	AAEL010665-RA	5573682	RNA-binding protein 45	326.221	338.802	338.009	334.884	417.466	380.409	416.808	373.551	365.769	0.251208	0.073073	3.43777	0.000586528	0.0179857	yes
239	AAEL004999-RA	5565798	uncharacterized LOC5565798	361.26	321.627	334.927	306.442	412.189	370.265	384.547	392.929	360.523	0.248553	0.0793885	3.13084	0.00174307	0.0417791	yes
310	AAEL006711-RA	5568284	BCL2/adenovirus E1B 19 kDa protein-interacting protein 3	1033.03	1281.83	1121.9	1178.06	1352.66	1421.46	1394.95	1302.59	1260.81	0.242096	0.0751199	3.2228	0.00126945	0.0327759	yes
624	AAEL013108-RB	5577249	WASH complex subunit 4	325.013	340.363	317.462	307.359	357.661	407.037	390.999	377.858	352.969	0.238626	0.077619	3.07433	0.00210979	0.0484527	yes
228	AAEL004852-RB	5565536	BTB/POZ domain-containing protein 10	658.483	635.448	605.129	594.534	760.469	741.797	751.028	663.135	676.253	0.228911	0.0677548	3.37852	0.000728782	0.0212519	yes
163	AAEL003704-RA	5578763	39S ribosomal protein L13, mitochondrial	389.049	387.202	367.804	366.079	434.47	432.398	443.907	460.749	410.207	0.228853	0.0656998	3.48332	0.000495233	0.0158208	yes
434	AAEL009287-RA	5571763	GTP-binding nuclear protein Ran	930.334	921.946	1049.99	996.395	1201.39	1134.89	1167.84	1052.83	1056.95	0.227167	0.0680292	3.33926	0.000840025	0.023846	yes
501	AAEL010641-RB	5573644	SUMO-activating enzyme subunit 2	540.077	522.254	494.172	492.693	589.847	618.798	632.309	551.177	555.166	0.220992	0.0677329	3.26269	0.00110359	0.0294898	yes
476	AAEL010063-RA	5572840	T-complex protein 1 subunit gamma	782.93	798.604	793.141	767.022	922.882	987.795	880.071	848.295	847.593	0.211648	0.0598311	3.53742	0.000404051	0.0133668	yes
114	AAEL002551-RB	5580192	DNA topoisomerase I, mitochondrial	2219.51	2086.67	2198.6	2161.61	2481.93	2491.68	2538.27	2506.13	2335.55	0.210215	0.0342533	6.13707	8.41e-10	1.02e-07	yes
359	AAEL007650-RA	5579472	T-complex protein 1 subunit beta	843.342	834.513	838.346	790.877	974.479	1018.23	887.814	917.193	888.099	0.201985	0.0591005	3.41765	0.000631634	0.0190249	yes
301	AAEL006472-RD	5568010	dmX-like protein 2	1049.95	1046.85	1170.19	1025.75	1258.26	1208.43	1289.14	1158.33	1150.86	0.196191	0.0625145	3.13832	0.00169917	0.0410949	yes
451	AAEL009604-RF	5572193	receptor expression-enhancing protein 5	1197.35	1256.84	1268.82	1220.26	1509.21	1307.34	1344.62	1465.14	1321.2	0.190394	0.0612352	3.10923	0.00187576	0.0443632	yes
618	AAEL013052-RA	5577180	ubiquitin carboxyl-terminal hydrolase	660.9	692.435	711.977	671.603	811.479	726.581	798.774	770.786	730.567	0.186795	0.0580151	3.21977	0.00128294	0.033005	yes
437	AAEL009320-RA	5571783	T-complex protein 1 subunit alpha	855.424	825.926	832.181	770.692	917.605	967.506	970.401	880.591	877.541	0.184699	0.0576025	3.20644	0.0013439	0.0342438	yes
217	AAEL004586-RB	5565108	histone deacetylase Rpd3	795.013	880.572	788.004	829.412	922.882	972.578	925.236	922.575	879.534	0.179646	0.0554143	3.24187	0.00118747	0.0309958	yes
623	AAEL013076-RB	5577191	signal recognition particle 54 kDa protein	727.352	714.293	699.649	706.468	811.479	778.57	767.804	808.464	751.76	0.158172	0.0499383	3.16734	0.00153839	0.0380229	yes
266	AAEL005798-RA	5567068	V-type proton ATPase subunit B	3344.37	3345.86	3364.68	3632.35	3242.99	3042	3026.05	3049.77	3256.01	-0.145461	0.0460726	-3.15722	0.00159282	0.0391421	yes
645	AAEL013778-RA	5578596	F-actin-capping protein subunit alpha	1077.74	1132.72	1152.73	1101.91	1037.8	978.919	982.015	952.718	1052.07	-0.172692	0.0497761	-3.46938	0.00052166	0.0164735	yes
407	AAEL008672-RA	5570930	ATP-binding cassette sub-family G member 1	5560.26	4781.47	5205.76	5333.37	4641.38	4538.28	4473.91	4792.65	4915.89	-0.177853	0.0564551	-3.15035	0.00163077	0.0398004	yes
357	AAEL007631-RB	5569422	serine/threonine-protein phosphatase 4 regulatory subunit 1	822.802	847.004	820.88	862.441	766.918	734.189	713.606	736.338	788.022	-0.180114	0.0508814	-3.53987	0.000400319	0.0132638	yes
461	AAEL009733-RA	5572347	ras-related protein Rac1	941.208	1023.43	1040.74	1025.75	934.022	872.404	856.843	885.974	947.547	-0.180506	0.0553443	-3.2615	0.00110823	0.0295083	yes
381	AAEL008041-RB	5569945	bleomycin hydrolase	1150.23	1125.7	1076.7	1135.85	946.335	1013.16	920.074	1066.83	1054.36	-0.186942	0.0602572	-3.1024	0.00191956	0.0451497	yes
561	AAEL011740-RA	5575270	uncharacterized LOC5575270	793.804	832.952	872.249	908.316	748.742	773.498	725.22	740.644	799.428	-0.190957	0.0589395	-3.23988	0.00119581	0.0311377	yes
604	AAEL012671-RB	5576642	activating transcription factor of chaperone	10700	11326.4	11374.2	10811.7	9365.43	9008.08	10248.6	9903.96	10342.3	-0.198945	0.0525379	-3.78669	0.000152669	0.0060965	yes
371	AAEL007808-RA	5569664	cytochrome P450 4d1	701.979	632.325	673.964	666.098	546.459	609.922	598.758	579.166	626.084	-0.200518	0.0641917	-3.12374	0.00178566	0.0425141	yes
219	AAEL004589-RC	5565095	calcium-binding mitochondrial carrier protein SCaMC-2	2079.36	1893.07	2031.14	1990.96	1824.07	1618.01	1642.71	1839.77	1864.88	-0.203487	0.0622833	-3.26713	0.00108645	0.0292772	yes
460	AAEL009695-RB	5572260	venom allergen 5.02	1213.06	1086.66	1193.82	1059.7	971.547	1062.61	931.688	938.723	1057.23	-0.220398	0.0709708	-3.10548	0.00189972	0.044831	yes
267	AAEL005839-RA	5567097	uridine phosphorylase 1	1343.55	1403.61	1221.56	1312.93	1116.96	1151.37	1185.9	1086.21	1227.76	-0.221083	0.05895	-3.75035	0.00017659	0.00685978	yes
157	AAEL003524-RB	5578372	monocarboxylate transporter 10	873.547	949.269	887.66	875.286	788.026	757.013	700.702	824.612	832.015	-0.221775	0.0653079	-3.39583	0.000684203	0.020144	yes
147	AAEL003267-RC	5577649	uncharacterized LOC5577649	1086.2	1197.51	1248.27	1175.31	1006.73	994.135	926.526	1106.66	1092.67	-0.222498	0.0717369	-3.10158	0.00192489	0.0452254	yes
275	AAEL006070-RA	5567423	phosphoglycerate mutase 2	7365.35	6921.23	6833.13	6885.77	6083.16	6077.66	5280.43	6543.07	6498.73	-0.223113	0.0720438	-3.0969	0.00195555	0.0457449	yes
155	AAEL003483-RA	5578210	uncharacterized LOC5578210	1504.24	1517.58	1437.31	1473.49	1171.49	1337.77	1313.65	1273.52	1378.63	-0.224877	0.0559461	-4.01952	5.83e-05	0.00267729	yes
99	AAEL002141-RA	5580091	neprilysin-2	875.964	835.294	909.235	837.669	757.537	707.56	709.735	769.71	800.338	-0.225446	0.0571712	-3.94335	8.04e-05	0.00352135	yes
584	AAEL012128-RB	5575859	cationic amino acid transporter 2	747.892	729.906	740.744	710.138	632.649	583.293	625.857	650.216	677.587	-0.228044	0.055177	-4.13295	3.58e-05	0.0017994	yes
29	AAEL000713-RD	5565892	reticulon-1-A	3825.24	3750.24	3907.14	3729.6	3034.25	3220.79	3410.6	3317.83	3524.46	-0.230491	0.0468515	-4.91961	8.67e-07	6.75e-05	yes
364	AAEL007752-RA	5569566	cytochrome c oxidase subunit 7A, mitochondrial	3607.76	3215.49	3128.39	3382.79	2593.92	2870.82	2855.71	3047.62	3087.81	-0.230911	0.0706421	-3.26874	0.00108027	0.0291576	yes
483	AAEL010256-RB	5573069	E3 ubiquitin-protein ligase SMURF2	756.349	758.01	802.387	778.95	695.386	599.778	716.187	620.074	715.89	-0.231123	0.071662	-3.22518	0.00125895	0.0325441	yes
113	AAEL002539-RB	5580194	plastin-1	1424.5	1326.32	1474.3	1408.35	1210.18	1087.97	1256.88	1236.92	1303.18	-0.231238	0.0618764	-3.7371	0.000186153	0.00714055	yes
681	AAEL014526-RB	5564606	sideroflexin-1	1297.63	1170.19	1213.34	1289.07	1054.22	1120.94	957.497	1095.89	1149.85	-0.231351	0.0663127	-3.48879	0.000485219	0.0155706	yes
360	AAEL007651-RB	5569470	probable phosphorylase b kinase regulatory subunit alpha	3319	3236.57	3206.47	3023.13	2721.15	2759.23	2490.52	2864.61	2952.59	-0.237669	0.0562146	-4.22788	2.36e-05	0.00126547	yes
223	AAEL004688-RC	5565253	beta-1,4-mannosyltransferase egh	708.02	792.358	809.579	710.138	617.404	598.51	669.732	676.053	697.724	-0.240736	0.0752462	-3.19931	0.00137756	0.0347294	yes
20	AAEL000469-RA	5577342	E3 ubiquitin-protein ligase KCMF1	1271.05	1316.95	1528.75	1321.19	1186.73	1100.65	1205.26	1104.51	1254.39	-0.241467	0.0741575	-3.25614	0.00112938	0.0298435	yes
338	AAEL007283-RC	5569000	acyl-CoA synthetase short-chain family member 3, mitochondrial	2648.43	3042.97	3081.13	2673.57	2354.7	2418.13	2623.44	2294.06	2642.05	-0.241579	0.0757397	-3.18959	0.00142474	0.0357923	yes
341	AAEL007322-RA	5569026	putative phosphatidate phosphatase	470	512.886	442.803	446.818	405.74	413.378	372.933	387.546	431.513	-0.245296	0.0773524	-3.17115	0.00151837	0.0376149	yes
98	AAEL002130-RA	5573583	neural/ectodermal development factor IMP-L2	1761.59	1749.43	1678.75	1564.32	1561.98	1347.92	1482.7	1292.9	1554.95	-0.246025	0.0781156	-3.1495	0.0016355	0.0398705	yes
517	AAEL011019-RA	5574245	cytoplasmic dynein 1 light intermediate chain 1	1359.25	1512.9	1612.99	1604.69	1336.83	1317.48	1309.78	1162.64	1402.07	-0.248723	0.0769732	-3.23129	0.00123234	0.0320109	yes
247	AAEL005218-RC	5566176	uncharacterized LOC5566176	611.362	551.919	596.91	573.432	471.408	476.779	483.91	527.493	536.652	-0.250983	0.0669961	-3.74624	0.000179507	0.00693532	yes
579	AAEL012098-RC	5575836	synaptic vesicle glycoprotein 2C	1947.66	1513.68	1669.5	1708.37	1414.81	1467.11	1423.34	1427.46	1571.49	-0.253151	0.0803338	-3.15124	0.00162576	0.0397235	yes
934	AAEL028013-RA	5576312	alanine--glyoxylate aminotransferase 2-like	4709.66	4176.47	4260.56	4670.95	3831.66	3611.35	3517.7	3973.42	4093.97	-0.253525	0.0646458	-3.92175	8.79e-05	0.00380885	yes
294	AAEL006436-RF	5567988	probable phosphorylase b kinase regulatory subunit beta	2258.17	2195.96	2104.08	2132.25	1814.1	1978.13	1796.27	1701.97	1997.62	-0.254055	0.0558002	-4.55294	5.29e-06	0.000333024	yes
679	AAEL014457-RA	5578614	protein borderless	1290.39	1348.18	1449.64	1388.16	1082.95	1124.74	1290.43	1094.82	1258.66	-0.257321	0.0729509	-3.52732	0.000419782	0.0137807	yes
116	AAEL002572-RA	5580173	myosin regulatory light chain 2	16031.9	15572.4	15464.2	15601	12215.6	13380.2	12272	14443.6	14372.6	-0.260771	0.0635936	-4.10059	4.12e-05	0.00203707	yes
534	AAEL011248-RA	5574614	innexin inx3	689.897	672.919	661.636	771.61	572.843	584.561	543.27	632.992	641.216	-0.260851	0.0772849	-3.37519	0.000737653	0.021423	yes
323	AAEL006966-RG	5568617	endothelial lipase	994.37	944.585	983.207	921.161	759.882	843.239	720.058	879.514	880.752	-0.263383	0.0753871	-3.49375	0.000476295	0.0153072	yes
492	AAEL010487-RA	5565293	protein THEM6	392.673	441.066	401.707	405.531	319.549	332.224	341.963	380.011	376.841	-0.265114	0.0833355	-3.18129	0.00146623	0.0366198	yes
515	AAEL011004-RB	5574236	uncharacterized LOC5574236	344.344	360.66	318.489	322.957	286.129	271.358	278.732	282.047	308.09	-0.265986	0.0788419	-3.37366	0.000741763	0.021484	yes
127	AAEL002811-RA	5576124	uncharacterized LOC5576124	776.889	750.203	693.485	787.207	600.987	627.674	585.854	685.741	688.505	-0.267612	0.0730915	-3.66133	0.000250914	0.00913362	yes
861	AAEL024210-RA	5566777	dorsal-ventral patterning protein Sog	1390.67	1333.35	1468.13	1344.12	1221.91	1115.87	1028.47	1216.46	1264.87	-0.26817	0.0713347	-3.75932	0.000170375	0.00669338	yes
626	AAEL013139-RI	5577289	ras-like GTP-binding protein Rho1	1075.32	1241.23	1165.05	1233.11	896.497	1020.76	947.173	1058.22	1079.67	-0.270028	0.0775937	-3.48002	0.000501374	0.0159694	yes
530	AAEL011191-RA	5574517	protein phosphatase 1 regulatory subunit 3A	6502.67	6137.46	6732.45	6925.22	5564.26	5135.52	5366.89	5653.87	6002.29	-0.275128	0.0542964	-5.06714	4.04e-07	3.32e-05	yes
581	AAEL012110-RB	5575825	aminopeptidase N	3756.37	4107.77	4174.26	4102.1	3271.72	3379.3	3342.21	3356.58	3686.29	-0.275573	0.0431552	-6.38563	1.71e-10	2.21e-08	yes
34	AAEL000993-RB	5567811	division abnormally delayed protein	1084.99	1053.09	1189.71	1051.44	895.324	864.796	969.111	879.514	998.498	-0.279222	0.0638857	-4.37066	1.24e-05	0.000725525	yes
485	AAEL010296-RA	5573091	methylcrotonoyl-CoA carboxylase subunit alpha, mitochondrial	566.658	510.544	523.966	561.504	423.916	452.686	440.036	467.208	493.315	-0.28003	0.0686964	-4.07635	4.57e-05	0.00221039	yes
469	AAEL009899-RA	5572580	uncharacterized LOC5572580	4329.07	4191.3	4487.62	4542.5	3472.24	3852.27	3454.47	3681.69	4001.4	-0.280106	0.0518417	-5.40311	6.55e-08	6.31e-06	yes
84	AAEL001845-RB	5572666	sepiapterin reductase	971.414	826.707	790.059	869.781	711.217	701.22	651.666	776.169	787.279	-0.280645	0.0866157	-3.24012	0.00119481	0.0311377	yes
683	AAEL014564-RB	5567116	pleckstrin homology domain-containing family F member 1 homolog	628.277	606.564	572.253	622.059	489.585	512.284	496.814	502.733	553.821	-0.282058	0.0592063	-4.76399	1.9e-06	0.000136324	yes
532	AAEL011217-RA	5574538	PQ-loop repeat-containing protein 3	462.751	485.563	510.61	487.188	371.146	445.078	423.26	372.475	444.759	-0.282312	0.0826559	-3.41552	0.000636615	0.0191109	yes
908	AAEL026787-RA	5573297	xanthine dehydrogenase	1118.82	1243.57	1366.42	1241.37	1054.22	996.671	1025.89	1008.7	1131.96	-0.282342	0.068276	-4.1353	3.54e-05	0.00178949	yes
123	AAEL002761-RC	5575995	tropomyosin-2	4702.42	5135.89	5225.28	4369.09	4429.72	3863.68	3610.61	4053.09	4423.72	-0.283396	0.0880605	-3.2182	0.00129	0.0331466	yes
511	AAEL010879-RA	5574042	cell death-inducing p53-target protein 1	705.604	758.79	851.702	861.524	656.102	699.952	661.989	593.161	723.603	-0.285227	0.0890234	-3.20395	0.00135556	0.0343772	yes
768	AAEL019813-RL	5573135	nuclear pore complex protein DDB_G0274915	367.301	344.266	365.749	333.967	300.2	275.162	261.957	311.113	319.964	-0.285473	0.0835692	-3.41601	0.000635459	0.019103	yes
142	AAEL003139-RD	5577233	retinol dehydrogenase 14	275.476	256.053	289.722	277.082	225.737	218.101	247.762	208.844	249.847	-0.285645	0.0896419	-3.18651	0.00144001	0.0360325	yes
594	AAEL012298-RA	5576071	fatty acid hydroxylase domain-containing protein 2	273.059	288.84	257.874	274.33	234.532	213.029	233.567	214.227	248.682	-0.286038	0.0864547	-3.30853	0.000937873	0.0261724	yes
268	AAEL005849-RA	5579856	synaptic vesicle glycoprotein 2C	14255.9	14865.1	14481	14814.7	10936.8	11568.2	12371.3	12991.4	13285.6	-0.287759	0.0612605	-4.69731	2.64e-06	0.000179694	yes
210	AAEL004382-RA	5564658	uncharacterized LOC5564658	1809.92	1896.98	1716.76	1979.03	1515.07	1643.37	1508.51	1397.32	1683.37	-0.28922	0.0695584	-4.15795	3.21e-05	0.00165622	yes
491	AAEL010470-RA	5573370	calcineurin subunit B type 2	1382.21	1174.88	1232.86	1267.97	1004.97	1013.16	1000.08	1108.81	1148.12	-0.291563	0.0679498	-4.29086	1.78e-05	0.000992075	yes
128	AAEL002817-RB	5576118	uncharacterized protein KIAA1683 homolog	860.257	942.243	1030.47	896.389	862.49	740.529	751.028	682.512	845.739	-0.29285	0.0949378	-3.08466	0.00203788	0.0470668	yes
111	AAEL002435-RE	5580128	modifier of mdg4	414.421	395.008	448.967	468.838	334.207	370.265	354.867	355.251	392.728	-0.293275	0.0829434	-3.53585	0.000406468	0.0134053	yes
298	AAEL006458-RB	5568019	alcohol dehydrogenase class-3	550.951	542.551	520.884	439.478	393.427	427.326	434.874	424.148	466.705	-0.293499	0.0916606	-3.20201	0.0013647	0.0344945	yes
735	AAEL019476-RA	5573569	uncharacterized LOC5573569	1113.98	925.849	920.536	959.695	886.529	717.705	784.58	791.24	887.515	-0.295844	0.0940938	-3.14414	0.00166576	0.0405158	yes
237	AAEL004988-RA	5565774	phosphoglycerate kinase	7947.71	7887.67	7994.08	8162.92	6881.16	6082.74	6475.36	6583.98	7251.95	-0.29671	0.0446364	-6.64727	2.99e-11	4.12e-09	yes
297	AAEL006446-RA	5568007	alpha,alpha-trehalose-phosphate synthase [UDP-forming]	25903.2	21602.1	22071.3	26001.7	19215.8	18195	20446.8	19947.9	21673	-0.296759	0.0837379	-3.54391	0.000394242	0.013103	yes
701	AAEL017059-RB	23687479	2-oxoisovalerate dehydrogenase subunit beta, mitochondrial	341.928	343.485	356.502	367.914	287.301	295.451	290.346	274.512	319.68	-0.298754	0.0734492	-4.0675	4.75e-05	0.00227549	yes
368	AAEL007773-RA	5569577	uncharacterized LOC5569577	441.002	453.557	429.447	404.613	337.139	347.44	366.481	360.633	392.539	-0.298837	0.0721409	-4.14241	3.44e-05	0.00175142	yes
488	AAEL010368-RC	5573290	peroxisomal membrane protein PEX14	363.676	345.827	347.256	335.802	279.679	262.482	282.603	302.501	314.978	-0.301206	0.076389	-3.94306	8.04e-05	0.00352135	yes
57	AAEL001323-RA	5569805	protein takeout	977.455	884.475	912.317	822.072	768.677	741.797	700.702	694.354	812.731	-0.301922	0.0717647	-4.20712	2.59e-05	0.00137767	yes
235	AAEL004930-RA	5565700	carbonic anhydrase	2660.51	2592.53	2664.01	2714.86	2140.69	2213.98	2009.19	2251	2405.85	-0.302783	0.0450075	-6.72738	1.73e-11	2.45e-09	yes
478	AAEL010146-RC	5572923	trifunctional enzyme subunit alpha, mitochondrial	3797.45	3751.02	3682.15	3930.53	2924.61	2962.12	3166.71	3230.63	3430.65	-0.304953	0.0476595	-6.39858	1.57e-10	2.06e-08	yes
180	AAEL003934-RA	5563773	uncharacterized LOC5563773	4933.19	4532.45	4733.16	4319.55	3613.55	4004.44	3778.37	3593.41	4188.51	-0.305326	0.0601132	-5.07919	3.79e-07	3.17e-05	yes
520	AAEL011051-RC	5574290	lysophospholipid acyltransferase 1	2027.4	2407.52	2193.47	2163.44	1858.08	1734.66	1774.34	1737.5	1987.05	-0.307489	0.0633473	-4.85401	1.21e-06	9.02e-05	yes
87	AAEL001920-RA	5572993	protein msta	587.198	622.958	653.417	590.864	459.096	499.604	498.105	536.106	555.918	-0.307506	0.0732115	-4.20025	2.67e-05	0.00140908	yes
759	AAEL019742-RA	5567141	uncharacterized LOC5567141	821.594	701.803	870.195	803.722	695.386	631.479	598.758	642.681	720.702	-0.309273	0.087321	-3.54179	0.000397423	0.0131883	yes
308	AAEL006602-RA	5568167	uncharacterized LOC5568167	995.578	975.03	940.057	1038.6	705.94	741.797	877.49	870.902	893.174	-0.309273	0.0892151	-3.4666	0.000527076	0.0165905	yes
703	AAEL017188-RA	23687608	protein brown	200.565	196.723	198.285	189.921	153.618	168.648	162.594	151.789	177.768	-0.309956	0.0968024	-3.20195	0.00136502	0.0344945	yes
475	AAEL010037-RB	5572750	phosphoglucomutase	3680.26	3293.56	3436.6	3401.14	2732.88	2826.44	2647.96	2913.06	3116.49	-0.311747	0.0514728	-6.05654	1.39e-09	1.63e-07	yes
328	AAEL007041-RB	5568706	low-density lipoprotein receptor-related protein 1	621.028	697.119	798.278	746.838	569.912	578.221	611.662	545.794	646.107	-0.315447	0.0892105	-3.53599	0.000406254	0.0134053	yes
206	AAEL004341-RA	5564575	esterase B1	2028.61	2078.09	2019.84	1902.88	1539.11	1611.67	1641.42	1669.68	1811.41	-0.31629	0.0479157	-6.60098	4.08e-11	5.5e-09	yes
670	AAEL014366-RC	5564268	protein takeout	521.954	487.905	585.609	500.95	408.085	442.542	427.131	404.77	472.368	-0.318565	0.0805012	-3.95726	7.58e-05	0.00337361	yes
700	AAEL016984-RA	23687404	glyceraldehyde-3-phosphate dehydrogenase 1	32576.2	30623.3	30134.2	34249.9	27468.9	24811.5	22307.6	27645	28727.1	-0.319438	0.086734	-3.68296	0.000230544	0.0086118	yes
702	AAEL017133-RA	23687553	3-oxoacyl-[acyl-carrier-protein] reductase FabG	248.895	236.537	222.942	273.412	182.935	194.008	197.435	215.303	221.433	-0.320965	0.104679	-3.06619	0.00216809	0.0494731	yes
89	AAEL001946-RA	5573016	four and a half LIM domains protein 2	1736.22	1779.88	1899.63	1608.36	1374.94	1247.74	1671.1	1331.65	1581.19	-0.32101	0.102737	-3.12458	0.00178056	0.0424471	yes
218	AAEL004588-RA	5565111	uncharacterized LOC5565111	421.671	421.55	503.418	484.435	354.729	353.78	363.9	394.005	412.186	-0.321648	0.0890957	-3.61014	0.000306026	0.0107911	yes
906	AAEL026746-RA	5578909	fatty acyl-CoA reductase wat	433.753	459.021	449.994	445.901	337.725	403.233	298.089	394.005	402.715	-0.322776	0.102066	-3.16243	0.00156459	0.0385813	yes
674	AAEL014413-RA	5564380	probable cytochrome P450 304a1	1417.25	1330.23	1542.1	1391.83	1162.1	1247.74	966.53	1160.49	1277.28	-0.322968	0.0897894	-3.59695	0.000321972	0.0112422	yes
815	AAEL021584-RA	5564474	protein borderless	652.442	604.222	650.334	723.9	504.243	569.345	509.719	519.958	591.77	-0.325622	0.0786688	-4.13914	3.49e-05	0.00176813	yes
467	AAEL009861-RD	5572533	uncharacterized LOC5572533	2323.42	2350.53	2182.16	2662.56	1916.71	1952.76	1745.95	1977.56	2138.96	-0.325937	0.0765224	-4.25936	2.05e-05	0.00112225	yes
726	AAEL018354-RB	5579855	oxysterol-binding protein 1	479.666	398.131	498.281	496.363	389.909	352.512	380.676	362.786	419.79	-0.326978	0.0958097	-3.41279	0.000643013	0.019249	yes
725	AAEL018347-RC	5566813	uncharacterized LOC5566813	264.601	234.195	246.572	249.558	182.935	221.905	189.693	202.385	223.98	-0.327065	0.0975532	-3.35268	0.000800318	0.0229317	yes
361	AAEL007682-RC	5569496	protein bunched, class 2/F/G isoform	1877.58	1839.21	1851.35	1871.68	1553.19	1412.58	1433.66	1507.12	1668.3	-0.327207	0.0439595	-7.44338	9.81e-14	1.59e-11	yes
639	AAEL013542-RA	5578161	elongation of very long chain fatty acids protein AAEL008004-like	1806.3	1944.6	1921.21	1689.1	1258.26	1548.26	1554.96	1514.66	1654.67	-0.328342	0.0889952	-3.68943	0.000224753	0.00845451	yes
756	AAEL019716-RA	5564518	microtubule-associated protein Jupiter	643.984	708.048	769.511	748.673	589.261	547.789	551.012	594.237	644.064	-0.328819	0.0736847	-4.46251	8.1e-06	0.000493975	yes
233	AAEL004919-RB	5565695	neuronal acetylcholine receptor subunit alpha-4	383.008	345.827	365.749	317.452	276.747	273.894	254.214	314.343	316.404	-0.329672	0.096907	-3.40195	0.000669077	0.0198076	yes
848	AAEL023521-RA	5568876	uncharacterized LOC5568876	2033.44	1981.29	2294.15	2091.88	1712.08	1568.55	1702.07	1681.52	1883.12	-0.332419	0.0613874	-5.4151	6.13e-08	5.96e-06	yes
378	AAEL007920-RH	5569782	MOB kinase activator-like 2	250.103	261.517	303.078	310.112	214.596	224.441	236.148	221.763	252.72	-0.333505	0.101929	-3.27192	0.00106821	0.0289416	yes
508	AAEL010850-RA	5574015	troponin I	838.509	1075.73	1037.66	886.296	714.149	814.075	796.193	722.343	860.62	-0.337402	0.10176	-3.31565	0.000914302	0.0256148	yes
786	AAEL019957-RA	5579337	gamma-glutamyltranspeptidase 1	705.604	740.055	658.553	649.584	467.89	546.521	631.019	543.641	617.858	-0.338423	0.102783	-3.29259	0.000992691	0.0273694	yes
124	AAEL002765-RB	5576000	nuclear receptor subfamily 2 group F member 1-B	385.424	356.756	423.282	367.914	290.233	320.811	291.636	310.037	343.262	-0.339623	0.0849021	-4.00018	6.33e-05	0.00288865	yes
246	AAEL005204-RA	5566111	feline leukemia virus subgroup C receptor-related protein 2	402.339	441.847	486.98	485.353	362.938	338.564	394.871	339.103	406.499	-0.342062	0.0912698	-3.74782	0.00017838	0.00691676	yes
523	AAEL011070-RA	5574304	uncharacterized LOC5574304	764.807	878.23	874.304	836.752	673.106	697.416	696.831	583.472	750.615	-0.342365	0.0801816	-4.26988	1.96e-05	0.00107893	yes
53	AAEL001294-RA	5569806	uncharacterized LOC5569806	480.874	498.054	548.623	445.901	392.254	398.161	345.834	416.612	440.789	-0.342937	0.0917868	-3.73624	0.000186796	0.00715237	yes
509	AAEL010850-RL	5574015	troponin I	2534.86	2600.34	2322.92	2301.98	2080.3	1981.93	1766.59	1854.84	2180.47	-0.343266	0.0728157	-4.71418	2.43e-06	0.000168104	yes
576	AAEL012083-RE	5575809	tyrosine-protein phosphatase 10D	311.722	343.485	347.256	348.647	248.603	281.502	256.795	286.354	303.046	-0.343629	0.0850899	-4.03842	5.38e-05	0.00250388	yes
459	AAEL009691-RC	5572254	pyruvate carboxylase, mitochondrial	4066.89	3878.26	3560.91	3789.24	2826.69	2711.05	3129.29	3369.5	3416.48	-0.345902	0.083436	-4.14571	3.39e-05	0.00173648	yes
227	AAEL004824-RB	5565491	uncharacterized LOC5565491	317.763	372.369	391.433	344.059	294.337	289.111	249.052	286.354	318.06	-0.346461	0.0963407	-3.59621	0.000322891	0.011256	yes
687	AAEL014765-RB	5565244	nose resistant to fluoxetine protein 6	372.134	395.789	402.735	382.594	323.067	259.946	304.541	327.261	346.008	-0.346702	0.0877341	-3.95174	7.76e-05	0.0034311	yes
325	AAEL006990-RC	5568636	uncharacterized protein T28D9.3	276.684	280.253	246.572	234.878	209.319	206.689	214.211	184.084	231.586	-0.349893	0.10147	-3.44823	0.000564273	0.0174533	yes
779	AAEL019870-RA	5578209	uncharacterized LOC5578209	845.758	729.906	641.088	699.128	525.937	537.644	637.471	588.855	650.723	-0.350229	0.107313	-3.26362	0.00109997	0.0294898	yes
837	AAEL022726-RA	110676873	uncharacterized LOC110676873	241.645	291.963	264.038	270.66	191.73	211.761	215.501	228.222	239.44	-0.350279	0.101256	-3.45935	0.000541485	0.016994	yes
293	AAEL006412-RB	5567979	sodium- and chloride-dependent GABA transporter ine	1360.46	1517.58	1642.79	1465.23	1243.02	1261.69	1092.99	1094.82	1334.82	-0.350467	0.0827657	-4.23445	2.29e-05	0.00124151	yes
852	AAEL023657-RA	5569213	5,10-methylenetetrahydrofolate reductase	505.038	499.615	413.009	489.023	367.042	367.728	398.742	364.939	425.642	-0.350894	0.085837	-4.08791	4.35e-05	0.00212705	yes
209	AAEL004379-RB	5564652	phosphatidylinositol 4-kinase type 2-alpha	391.465	333.337	404.789	393.604	306.064	323.347	289.056	271.282	339.118	-0.351841	0.0964176	-3.64913	0.000263128	0.00942926	yes
135	AAEL002969-RA	5576723	endochitinase	814.344	952.391	781.84	845.927	670.76	654.303	720.058	613.615	756.655	-0.355525	0.0848259	-4.19123	2.77e-05	0.00145196	yes
373	AAEL007826-RA	5569682	cGMP-dependent protein kinase, isozyme 2 forms cD4/T1/T3A/T3B	1093.44	922.727	961.632	1030.34	673.692	793.786	747.157	918.269	892.631	-0.35696	0.109267	-3.26687	0.00108743	0.0292772	yes
518	AAEL011022-RA	5574255	paxillin	1767.63	1819.69	1905.8	1704.7	1529.73	1411.32	1276.23	1386.55	1600.21	-0.357592	0.0691056	-5.17457	2.28e-07	1.95e-05	yes
27	AAEL000703-RA	5565921	glycogen phosphorylase	28058.6	22237.6	23925.7	25569.6	17830.8	19663.3	20079	20298.8	22207.9	-0.357847	0.0857498	-4.17315	3e-05	0.0015645	yes
145	AAEL003243-RA	5577660	melanization protease 1	1034.24	1192.05	1111.63	1086.31	810.307	852.116	923.946	874.132	985.591	-0.360909	0.0673365	-5.35978	8.33e-08	7.82e-06	yes
45	AAEL001128-RA	5568557	probable 4-coumarate--CoA ligase 1	3605.35	3202.22	3453.04	3858.05	2761.02	2770.64	2758.93	2671.92	3135.15	-0.36457	0.0638821	-5.70693	1.15e-08	1.24e-06	yes
17	AAEL000372-RA	5575141	inositol monophosphatase 1	457.918	444.97	486.98	489.94	350.038	391.821	387.128	338.026	418.353	-0.364841	0.0776085	-4.70104	2.59e-06	0.000177004	yes
30	AAEL000716-RA	5565900	carbohydrate sulfotransferase 11	338.303	412.182	364.721	357.821	286.129	258.678	274.861	325.108	327.226	-0.365016	0.102125	-3.57419	0.000351316	0.0119738	yes
599	AAEL012513-RP	5576419	calcium-binding protein E63-1	462.751	441.847	506.501	554.165	321.308	384.213	402.613	424.148	437.193	-0.365561	0.118719	-3.07922	0.00207543	0.047766	yes
930	AAEL027912-RA	5580178	sodium-coupled monocarboxylate transporter 1	865.09	690.874	727.388	844.092	557.599	593.438	600.048	674.976	694.188	-0.366626	0.102687	-3.57034	0.000356515	0.0121317	yes
25	AAEL000663-RA	5565452	MAPK regulated corepressor interacting protein 2	2021.36	2592.53	2447.23	2812.11	1866.29	1828.5	2091.78	1873.14	2191.62	-0.367423	0.107845	-3.40696	0.000656915	0.0195286	yes
41	AAEL001091-RA	5568365	NADP-dependent malic enzyme	1679.43	1841.55	2097.92	1940.49	1654.62	1388.49	1354.95	1440.38	1674.73	-0.370478	0.0952126	-3.89107	9.98e-05	0.00423014	yes
258	AAEL005531-RA	N/A		358.843	295.866	342.119	323.874	244.499	256.142	280.023	241.14	292.813	-0.371082	0.0947607	-3.91599	9e-05	0.00389307	yes
649	AAEL013936-RG	5578955	serine protease inhibitor 28Dc	1266.22	1372.38	1151.7	1248.71	1021.97	1113.33	881.362	874.132	1116.22	-0.372987	0.0995507	-3.74671	0.000179172	0.00693488	yes
398	AAEL008473-RA	5570678	Golgi-associated plant pathogenesis-related protein 1	1226.35	1242.01	1179.44	1420.28	968.615	912.981	1042.66	990.396	1122.84	-0.373688	0.0765189	-4.8836	1.04e-06	7.99e-05	yes
51	AAEL001287-RA	5569807	uncharacterized LOC5569807	1661.31	1878.24	2055.8	1741.4	1548.49	1538.12	1347.21	1224	1624.32	-0.374228	0.104677	-3.57505	0.000350155	0.0119533	yes
632	AAEL013458-RD	5577984	glutamine synthetase 2 cytoplasmic	7552.62	6770.57	6444.78	7285.8	5570.12	5125.37	5288.17	5648.49	6210.74	-0.374314	0.0654826	-5.71624	1.09e-08	1.18e-06	yes
796	AAEL020614-RB	23687616	protein gone early	467.583	524.596	582.527	436.726	391.668	407.037	353.577	398.311	445.253	-0.374827	0.108041	-3.4693	0.00052182	0.0164735	yes
582	AAEL012114-RB	5575841	troponin C	1185.27	1363.01	1224.64	1259.72	1138.65	887.62	816.84	1025.92	1112.71	-0.37599	0.113638	-3.30867	0.00093739	0.0261724	yes
188	AAEL003990-RE	5563911	myeloid leukemia factor	361.26	337.24	403.762	385.346	282.611	242.194	292.927	325.108	328.806	-0.377307	0.108194	-3.48732	0.000487891	0.0156329	yes
24	AAEL000644-RA	5565426	mpv17-like protein	535.244	544.893	542.459	542.237	382.286	443.81	402.613	447.831	480.172	-0.378077	0.0726078	-5.20711	1.92e-07	1.66e-05	yes
43	AAEL001105-RD	5568564	protein Vhl	169.152	159.252	175.683	178.911	117.852	125.535	138.076	147.483	151.493	-0.37947	0.11838	-3.20551	0.00134822	0.0343132	yes
36	AAEL001020-RB	5579904	regucalcin	2978.28	2402.84	2284.9	2635.03	1668.69	2025.04	2009.19	2218.7	2277.84	-0.379649	0.117375	-3.23449	0.0012186	0.0316926	yes
458	AAEL009685-RA	5572258	farnesol dehydrogenase-like	1245.68	1131.16	1046.9	1074.38	823.792	816.611	823.292	990.396	994.027	-0.380321	0.0907263	-4.19196	2.77e-05	0.00145082	yes
260	AAEL005544-RC	5566678	YTH domain-containing family protein 3	503.83	484.002	595.883	481.683	440.333	339.832	416.808	375.704	454.759	-0.38665	0.113887	-3.39505	0.000686171	0.0201742	yes
857	AAEL023854-RA	110675502	shematrin-like protein 1	582.365	591.732	497.254	490.858	463.2	424.79	371.643	386.47	476.039	-0.387347	0.107795	-3.59338	0.00032642	0.0113605	yes
866	AAEL024516-RA	110680277	serine/threonine-protein kinase OSR1-like	441.002	370.808	374.995	398.191	291.405	330.956	313.574	275.588	349.565	-0.389692	0.0926378	-4.20661	2.59e-05	0.00137767	yes
202	AAEL004278-RA	5564510	cytochrome b5-related protein	14309	12518.5	11809.8	12975.2	9205.95	9034.71	8981.37	12166.8	11375.2	-0.389872	0.119871	-3.25242	0.00114427	0.0300516	yes
56	AAEL001306-RA	5569810	uncharacterized LOC5569810	3836.12	3720.57	4522.55	3803	3662.8	2962.12	2731.83	2725.74	3495.59	-0.393261	0.118464	-3.31967	0.000901253	0.0253488	yes
588	AAEL012206-RF	5580230	microtubule-associated protein tau	640.36	518.351	572.253	582.607	408.085	447.614	452.94	452.137	509.293	-0.395366	0.0850415	-4.6491	3.33e-06	0.000217556	yes
828	AAEL022282-RD	110674160	RNA-binding protein cabeza-like	479.666	578.461	444.857	404.613	379.355	348.708	371.643	349.868	419.646	-0.39629	0.122184	-3.24339	0.00118117	0.0308691	yes
280	AAEL006171-RC	5567575	uncharacterized protein ZK1073.1	2244.88	2035.15	2340.38	2423.09	1554.36	1654.78	1809.18	1839.77	1987.7	-0.400368	0.0822607	-4.86707	1.13e-06	8.63e-05	yes
846	AAEL023335-RA	5574464	protein fem-1 homolog CG6966	274.267	288.059	332.873	338.554	230.427	235.853	246.472	224.992	271.437	-0.400494	0.0991575	-4.03897	5.37e-05	0.00250348	yes
638	AAEL013517-RA	5578132	endocuticle structural glycoprotein SgAbd-5	466.375	485.563	391.433	442.231	352.97	358.852	296.798	341.256	391.935	-0.400675	0.0981623	-4.08176	4.47e-05	0.00217423	yes
83	AAEL001840-RA	5572631	carboxypeptidase B	495.373	539.428	519.857	500.033	364.11	361.388	432.293	406.923	452.426	-0.401717	0.0796789	-5.04169	4.61e-07	3.74e-05	yes
589	AAEL012207-RF	5580231	myosin light chain alkali	11294.5	11228.1	11406	10507.1	8447.83	8530.03	7881.93	8752.08	9755.95	-0.402402	0.0476251	-8.44937	2.93e-17	5.8e-15	yes
862	AAEL024228-RA	5571664	enolase	6027.84	5672.19	6078.01	6159.12	4600.92	4523.06	4313.9	4652.71	5253.47	-0.402793	0.04263	-9.44859	3.43e-21	8.08e-19	yes
834	AAEL022609-RA	5566824	PDZ and LIM domain protein Zasp	2388.66	2679.19	3027.7	2670.82	2331.24	1940.08	1895.64	1966.8	2362.52	-0.402997	0.0989474	-4.07284	4.64e-05	0.00223893	yes
211	AAEL004440-RA	5564786	tubulin-specific chaperone cofactor E-like protein	828.843	772.061	764.374	635.821	642.03	475.511	517.461	623.303	657.426	-0.404793	0.128842	-3.14177	0.00167929	0.0407524	yes
912	AAEL026967-RA	110680584	troponin T, skeletal muscle-like	4679.46	5280.31	5383.49	4529.65	3910.23	3748.29	3562.87	3772.12	4358.3	-0.406092	0.0722319	-5.62207	1.89e-08	2e-06	yes
216	AAEL004547-RB	5565037	bombyxin B-1 homolog	1237.22	1316.17	1325.33	1490.92	846.659	1132.35	1121.38	962.406	1179.06	-0.406501	0.112907	-3.60032	0.000317828	0.0111521	yes
164	AAEL003713-RA	5578856	leucine-rich repeat-containing G-protein coupled receptor 5	265.81	355.195	315.407	324.792	226.323	214.297	269.699	246.522	277.256	-0.407752	0.11925	-3.41929	0.000627844	0.0189683	yes
236	AAEL004987-RA	5565773	putative beta-carotene-binding protein	3436.19	3371.62	3546.53	3207.55	2912.3	2421.94	2611.82	2253.15	2970.14	-0.409508	0.0871976	-4.69632	2.65e-06	0.000179993	yes
760	AAEL019745-RB	N/A		1052.36	1122.57	961.632	1105.58	703.595	705.024	894.266	894.586	929.952	-0.410923	0.110196	-3.72903	0.000192221	0.00732665	yes
281	AAEL006171-RK	5567575	uncharacterized protein ZK1073.1	955.707	903.21	961.632	894.554	761.055	645.427	774.256	606.079	812.74	-0.411607	0.09281	-4.43494	9.21e-06	0.000553725	yes
304	AAEL006538-RF	5568103	PXMP2/4 family protein 3	601.696	505.86	482.871	612.884	354.143	440.006	410.356	456.443	483.032	-0.411659	0.121837	-3.37877	0.000728105	0.0212519	yes
316	AAEL006834-RA	5568426	delta-1-pyrroline-5-carboxylate synthase	17386.4	16489.6	15688.2	17458	11466.2	12421.6	12719.7	13754.7	14673.1	-0.412538	0.0693652	-5.94733	2.73e-09	3.14e-07	yes
480	AAEL010190-RD	5572977	FH1/FH2 domain-containing protein 1	287.558	288.059	342.119	287.175	220.46	201.617	246.472	236.834	263.787	-0.413165	0.10248	-4.03166	5.54e-05	0.00256592	yes
8	AAEL000185-RB	5570050	eukaryotic translation initiation factor 5	1851	1747.87	1676.69	1708.37	1244.78	1527.98	1211.71	1259.53	1528.49	-0.414603	0.084675	-4.89641	9.76e-07	7.51e-05	yes
835	AAEL022609-RF	5566824	PDZ and LIM domain protein Zasp	1625.06	1445.76	1378.75	1812.04	1207.84	1099.38	1107.19	1272.44	1368.56	-0.416575	0.103224	-4.03563	5.45e-05	0.00252832	yes
365	AAEL007765-RA	5569575	serine protease inhibitor 42Dd	328.637	426.234	409.926	387.181	329.517	249.802	252.924	325.108	338.666	-0.417647	0.136099	-3.06871	0.00214987	0.0491497	yes
827	AAEL022068-RA	5564600	uncharacterized LOC5564600	187.275	192.04	177.738	166.066	128.992	140.751	139.366	135.641	158.484	-0.418414	0.107472	-3.89322	9.89e-05	0.00422202	yes
713	AAEL018150-RB	5567814	sodium-coupled monocarboxylate transporter 1	494.164	508.983	505.473	505.537	355.315	415.914	343.254	399.388	441.004	-0.418466	0.0763641	-5.47988	4.26e-08	4.28e-06	yes
724	AAEL018343-RA	N/A		1631.1	1360.67	1395.19	1263.38	1094.09	1228.72	855.553	1042.07	1233.85	-0.419548	0.127078	-3.30149	0.000961729	0.0266643	yes
789	AAEL020092-RA	5569968	protein scylla	4575.55	4269.37	4609.87	4648.01	3367.29	3118.08	3593.84	3440.55	3952.82	-0.420813	0.0560247	-7.5112	5.86e-14	9.65e-12	yes
151	AAEL003402-RG	5578088	sphingomyelin phosphodiesterase	786.555	781.429	921.564	858.771	548.804	518.624	686.507	743.873	730.766	-0.42442	0.132336	-3.20714	0.00134062	0.0342009	yes
802	AAEL020977-RA	110676596	uncharacterized LOC110676596	2087.81	1968.8	1760.94	1670.75	1275.85	1416.39	1354.95	1527.58	1632.88	-0.426498	0.0936031	-4.55645	5.2e-06	0.000329307	yes
751	AAEL019623-RA	5574166	ras-associated and pleckstrin homology domains-containing protein 1	201.774	185.794	204.45	221.115	165.931	122.999	141.947	166.86	176.359	-0.427965	0.12834	-3.33463	0.000854129	0.0241503	yes
439	AAEL009362-RA	5571884	cationic amino acid transporter 2	453.085	440.286	476.706	552.33	350.625	332.224	397.451	350.945	419.206	-0.428054	0.10033	-4.26646	1.99e-05	0.00109277	yes
636	AAEL013501-RA	5578064	phenoloxidase 2	233.188	208.433	227.052	219.28	134.269	169.916	178.079	184.084	194.288	-0.428444	0.127378	-3.36357	0.000769411	0.0221648	yes
708	AAEL017563-RA	23687983	bifunctional endo-1,4-beta-xylanase XylA	1985.12	2073.4	1934.56	2036.83	1661.07	1501.35	1462.05	1331.65	1748.25	-0.428642	0.0741787	-5.7785	7.54e-09	8.36e-07	yes
909	AAEL026825-RA	5573431	facilitated trehalose transporter Tret1	5227.99	4581.63	4366.38	4894.81	3050.67	3427.48	3534.48	4146.74	4153.77	-0.430018	0.106751	-4.02825	5.62e-05	0.00259774	yes
7	AAEL000143-RA	5567772	omega-amidase NIT2	311.722	296.646	336.982	296.35	194.075	228.245	255.505	248.675	271.025	-0.434033	0.113119	-3.83695	0.000124572	0.00512757	yes
876	AAEL024977-RA	5576067	phosphoglycolate phosphatase 1B, chloroplastic	559.409	609.687	626.705	625.729	452.06	551.593	449.069	342.332	527.073	-0.434208	0.137678	-3.15379	0.00161167	0.0394695	yes
351	AAEL007542-RA	5569335	cysteine sulfinic acid decarboxylase	7627.53	6000.07	6334.85	6332.52	4398.05	5210.33	5357.85	4495.54	5719.59	-0.434438	0.104798	-4.14547	3.39e-05	0.00173648	yes
494	AAEL010509-RF	5573460	amphiphysin	919.46	804.068	1016.08	817.484	675.451	574.417	624.567	751.409	772.867	-0.434553	0.114004	-3.81172	0.000138004	0.00561565	yes
197	AAEL004221-RA	5564353	glycogen [starch] synthase	3836.12	2969.59	3379.07	3289.2	2388.7	2538.59	2326.64	2704.21	2929.02	-0.435649	0.0917666	-4.74736	2.06e-06	0.000146067	yes
416	AAEL008928-RD	5571227	G protein-activated inward rectifier potassium channel 3	352.802	469.95	466.433	539.485	314.859	388.017	320.026	333.72	398.161	-0.436386	0.141895	-3.07542	0.00210206	0.048327	yes
49	AAEL001241-RA	5569450	PI-PLC X domain-containing protein 1	173.985	129.588	140.752	155.973	110.23	109.051	98.0724	122.723	130.047	-0.436448	0.140808	-3.0996	0.00193784	0.04543	yes
417	AAEL008928-RF	5571227	G protein-activated inward rectifier potassium channel 3	361.26	379.395	320.544	318.369	257.985	205.421	280.023	274.512	299.689	-0.437093	0.118916	-3.67565	0.000237247	0.00874015	yes
775	AAEL019849-RV	5567708	uncharacterized LOC5567708	500.206	526.157	648.28	545.907	409.844	448.882	400.032	381.087	482.549	-0.438539	0.101883	-4.30434	1.67e-05	0.000942261	yes
108	AAEL002385-RB	5574470	esterase B1	344.344	412.182	382.187	431.221	256.226	265.018	338.092	304.654	341.741	-0.44175	0.120055	-3.67956	0.000233641	0.00866698	yes
375	AAEL007883-RD	5569745	12 kDa FK506-binding protein	546.118	426.234	501.364	429.386	370.56	400.697	314.864	310.037	412.407	-0.442018	0.126392	-3.4972	0.000470172	0.015156	yes
15	AAEL000328-RD	5575162	zinc-type alcohol dehydrogenase-like protein C1773.06c	3921.9	4013.31	4528.71	4210.37	3234.78	2903.79	3433.83	2698.83	3618.19	-0.442197	0.09102	-4.85824	1.18e-06	8.93e-05	yes
200	AAEL004249-RB	5564443	flightin	1095.86	1234.21	1113.68	1115.67	887.116	859.724	741.995	852.602	987.607	-0.445981	0.0742201	-6.00891	1.87e-09	2.16e-07	yes
512	AAEL010883-RB	5574043	sodium- and chloride-dependent neutral and basic amino acid transporter B(0+)	328.637	322.408	373.968	328.462	250.949	294.183	234.858	212.074	293.192	-0.448975	0.113718	-3.94813	7.88e-05	0.00347604	yes
187	AAEL003989-RA	5563900	guanine nucleotide-binding protein G(s) subunit alpha	903.753	844.662	1005.81	931.253	689.523	645.427	738.124	624.38	797.866	-0.449089	0.0806556	-5.56799	2.58e-08	2.65e-06	yes
867	AAEL024520-RC	110676249	proton-coupled amino acid transporter 1-like	750.308	793.139	772.593	725.735	617.991	546.521	447.778	606.079	657.518	-0.449862	0.106377	-4.22892	2.35e-05	0.00126281	yes
75	AAEL001607-RB	5571495	probable galactose-1-phosphate uridylyltransferase	1512.7	1420	1471.21	1523.95	943.403	1081.63	1049.12	1268.14	1283.77	-0.451041	0.0938711	-4.80489	1.55e-06	0.000114278	yes
699	AAEL015411-RD	5568128	probable glutamine-dependent NAD(+) synthetase	361.26	370.027	297.941	271.577	242.74	249.802	201.307	255.135	281.224	-0.452076	0.13634	-3.31579	0.000913855	0.0256148	yes
329	AAEL007055-RA	5568702	lipase member H	553.367	579.241	405.817	470.673	325.413	414.646	331.64	398.311	434.888	-0.454244	0.144648	-3.14034	0.0016875	0.0409052	yes
705	AAEL017374-RE	23687794	probable G-protein coupled receptor Mth-like 1	190.9	183.452	207.532	151.386	146.582	116.659	134.204	132.412	157.891	-0.454814	0.138159	-3.29197	0.0009949	0.0273713	yes
139	AAEL003104-RD	5577066	RING finger protein nhl-1	1836.5	1848.58	1767.1	1639.56	1173.83	1157.71	1464.63	1380.09	1533.5	-0.455926	0.0937319	-4.86415	1.15e-06	8.72e-05	yes
889	AAEL025977-RJ	5564765	titin	697.146	577.68	759.237	677.108	446.196	438.738	472.296	616.844	585.656	-0.45727	0.138889	-3.29235	0.000993553	0.0273694	yes
872	AAEL024914-RA	5575942	organic cation transporter protein	270.643	253.711	325.681	311.947	187.625	238.389	221.953	203.462	251.676	-0.457876	0.125184	-3.65763	0.000254558	0.00925054	yes
115	AAEL002555-RC	5580175	sodium-coupled monocarboxylate transporter 1	433.753	455.899	533.213	511.042	367.628	277.698	344.544	413.383	417.145	-0.45925	0.132965	-3.45391	0.000552528	0.0171894	yes
727	AAEL018699-RM	5576943	sorbin and SH3 domain-containing protein 1	622.236	647.158	696.567	537.65	469.063	500.872	367.772	480.127	540.18	-0.459547	0.122255	-3.75892	0.000170652	0.00669338	yes
635	AAEL013496-RA	5578063	phenoloxidase 2	687.481	711.952	608.212	716.56	452.646	526.232	494.233	517.805	589.39	-0.459816	0.0835934	-5.50062	3.78e-08	3.86e-06	yes
932	AAEL027938-RE	5576722	sarcalumenin	577.532	641.693	730.47	562.422	555.84	438.738	374.224	446.755	540.959	-0.462509	0.143178	-3.2303	0.00123659	0.0320824	yes
585	AAEL012154-RF	5575910	trifunctional nucleotide phosphoesterase protein YfkN	165.527	142.859	134.587	144.964	114.334	88.762	101.944	115.187	126.02	-0.464968	0.134758	-3.45039	0.000559782	0.0173898	yes
224	AAEL004710-RC	5565303	phosphatidylcholine:ceramide cholinephosphotransferase 1	274.267	256.053	286.64	274.33	196.42	202.885	218.082	174.396	235.384	-0.465326	0.0949898	-4.89869	9.65e-07	7.48e-05	yes
430	AAEL009185-RA	5571596	arginine kinase	6067.71	6085.94	6127.32	6292.15	4402.16	4469.8	4208.08	4696.84	5293.75	-0.466927	0.0409456	-11.4036	4.01e-30	1.26e-27	yes
496	AAEL010545-RB	5573506	protein vestigial	219.897	184.233	195.203	157.808	154.205	128.071	143.237	116.264	162.365	-0.468852	0.148584	-3.15547	0.00160241	0.0392875	yes
170	AAEL003743-RD	5578943	V-type proton ATPase 116 kDa subunit a	692.313	980.495	965.741	828.494	625.027	699.952	503.266	677.129	746.552	-0.469469	0.147763	-3.17718	0.00148715	0.0370513	yes
271	AAEL005961-RA	5567310	actin-1-like	5580.8	6626.93	6673.89	5040.7	5123.34	3935.96	3526.74	4678.54	5148.36	-0.47001	0.147054	-3.19617	0.00139265	0.0350686	yes
652	AAEL013969-RC	5579032	syndecan	497.789	468.389	477.734	488.105	360.592	382.945	357.448	292.813	415.727	-0.470135	0.0887926	-5.29476	1.19e-07	1.08e-05	yes
497	AAEL010545-RC	5573506	protein vestigial	209.023	239.659	309.243	244.053	167.69	194.008	160.013	203.462	215.894	-0.470149	0.149637	-3.14193	0.00167841	0.0407524	yes
122	AAEL002759-RD	5575993	tropomyosin-1	2929.95	3658.12	3818.79	2944.23	2573.98	2326.83	2334.38	2380.18	2870.81	-0.473217	0.106255	-4.45359	8.44e-06	0.000512043	yes
707	AAEL017451-RA	23687871	angiotensin-converting enzyme	1539.28	1321.64	1515.39	1575.33	982.687	1072.75	1125.25	1108.81	1280.14	-0.474335	0.0779935	-6.08173	1.19e-09	1.41e-07	yes
28	AAEL000709-RC	5565922	NF-kappa-B inhibitor cactus	442.211	475.415	384.242	401.861	359.42	310.667	243.891	304.654	365.295	-0.475495	0.133615	-3.55869	0.000372708	0.0125235	yes
396	AAEL008370-RF	5570552	protein peste	270.643	280.253	264.038	267.907	201.697	204.153	174.208	194.85	232.218	-0.476543	0.0879345	-5.4193	5.98e-08	5.85e-06	yes
634	AAEL013466-RC	5578031	ankyrin-2	925.501	683.068	1017.11	848.679	653.757	698.684	566.497	568.401	745.212	-0.479944	0.138912	-3.45503	0.000550235	0.0171778	yes
808	AAEL021230-RA	5570420	protein takeout	502.622	487.125	532.185	450.488	409.258	400.697	305.831	290.66	422.358	-0.482275	0.134848	-3.57644	0.000348299	0.011928	yes
794	AAEL020380-RA	110674116	uncharacterized LOC110674116	147.404	192.82	162.327	181.663	130.165	125.535	110.977	122.723	146.702	-0.483728	0.128904	-3.75263	0.00017499	0.00680996	yes
605	AAEL012704-RC	5576671	uncharacterized LOC5576671	153.445	133.491	114.04	144.964	82.0861	106.514	100.653	104.422	117.452	-0.486555	0.155653	-3.1259	0.0017726	0.0423919	yes
37	AAEL001022-RB	5579903	regucalcin	7721.77	7343.56	5697.87	6789.43	4023.98	4519.26	5024.92	6085.55	5900.79	-0.48764	0.149683	-3.25782	0.00112272	0.0297105	yes
23	AAEL000564-RC	5564303	myotubularin-related protein 3	181.234	178.769	234.244	233.043	174.14	131.875	131.624	146.406	176.417	-0.488536	0.158128	-3.08949	0.00200497	0.0466969	yes
441	AAEL009387-RF	5571932	hexokinase type 2	223.522	155.349	206.504	211.94	151.859	148.359	121.3	141.024	169.982	-0.490163	0.150676	-3.25309	0.00114158	0.0300177	yes
201	AAEL004273-RA	5564501	17-beta-hydroxysteroid dehydrogenase 13	262.185	232.633	221.915	166.983	151.859	161.04	156.142	159.325	189.01	-0.49057	0.149462	-3.28223	0.00102988	0.0281168	yes
578	AAEL012083-RL	5575809	tyrosine-protein phosphatase 10D	274.267	304.453	321.571	372.501	250.362	238.389	238.729	177.625	272.237	-0.490919	0.144651	-3.39381	0.000689283	0.020225	yes
289	AAEL006267-RB	5567709	ras-related protein Rab-3	240.437	238.098	201.367	211.94	133.097	154.7	172.917	178.702	191.407	-0.493642	0.131353	-3.75812	0.000171194	0.00669878	yes
868	AAEL024560-RA	5569282	dendritic arbor reduction protein 1	252.519	242.001	335.955	267.907	218.701	214.297	179.369	163.631	234.297	-0.494871	0.151849	-3.25896	0.00111821	0.0296951	yes
4	AAEL000101-RA	5567779	luciferin 4-monooxygenase	409.589	361.44	323.626	369.749	239.222	232.049	250.343	316.496	312.814	-0.496271	0.126848	-3.91234	9.14e-05	0.0039366	yes
840	AAEL022995-RA	110676548	uncharacterized LOC110676548	161.902	192.82	195.203	175.241	143.651	120.463	125.171	120.57	154.378	-0.496944	0.122106	-4.06979	4.71e-05	0.0022582	yes
342	AAEL007374-RA	5569110	protein yellow	1149.02	1104.62	1189.71	1321.19	894.738	806.467	1032.34	642.681	1017.6	-0.497107	0.143886	-3.45487	0.00055055	0.0171778	yes
880	AAEL025199-RA	5567414	C-1-tetrahydrofolate synthase, cytoplasmic	1290.39	1074.95	1073.62	1054.2	758.123	777.302	740.705	895.662	958.118	-0.501077	0.0956912	-5.2364	1.64e-07	1.44e-05	yes
146	AAEL003259-RA	5577606	endocuticle structural glycoprotein ABD-4	990.745	1068.71	958.55	1020.25	664.897	746.869	717.477	725.573	861.634	-0.508407	0.0625241	-8.13138	4.24e-16	7.83e-14	yes
110	AAEL002417-RP	5574604	troponin T, skeletal muscle	269.434	246.685	249.654	283.505	173.553	147.091	221.953	195.926	223.475	-0.509869	0.131852	-3.86699	0.000110188	0.00460829	yes
141	AAEL003133-RC	5577230	Ig-like and fibronectin type-III domain-containing protein 1	975.038	1091.35	1314.02	1079.89	840.209	770.962	843.939	673.9	948.663	-0.510932	0.11614	-4.39926	1.09e-05	0.000644021	yes
77	AAEL001673-RA	5571832	actin, muscle	1993.57	2694.02	2955.79	2489.15	2143.03	1520.37	1788.53	1651.38	2154.48	-0.511586	0.15075	-3.39361	0.00068979	0.020225	yes
790	AAEL020095-RD	5576066	anoctamin-5	413.213	333.337	330.818	363.326	269.711	200.349	269.699	264.823	305.66	-0.511658	0.126096	-4.05767	4.96e-05	0.00235227	yes
173	AAEL003837-RR	5579122	ryanodine receptor	924.293	1166.29	1372.59	1469.82	761.055	810.271	918.784	972.095	1049.4	-0.512486	0.157424	-3.25545	0.00113212	0.029879	yes
732	AAEL019441-RD	5570772	actin-binding Rho-activating protein	2841.75	2506.66	2941.4	2622.19	1904.98	1737.2	1942.09	2053.99	2318.78	-0.513422	0.0760893	-6.74762	1.5e-11	2.14e-09	yes
320	AAEL006895-RD	5568472	ATP-dependent 6-phosphofructokinase	1331.46	1135.84	1191.77	1260.63	857.799	896.497	756.19	929.034	1044.9	-0.514009	0.0832219	-6.17637	6.56e-10	8.13e-08	yes
392	AAEL008263-RB	5570382	YY1-associated factor 2	207.815	192.82	195.203	215.61	131.924	112.855	176.788	148.559	172.697	-0.514842	0.14057	-3.66253	0.000249732	0.00910607	yes
528	AAEL011177-RA	5574456	uncharacterized LOC5574456	186.067	171.743	190.066	177.076	128.406	116.659	132.914	124.876	153.476	-0.519972	0.106684	-4.87394	1.09e-06	8.36e-05	yes
370	AAEL007800-RG	5572295	transcription factor CP2	453.085	371.589	371.913	374.336	255.639	234.585	255.505	347.715	333.046	-0.520216	0.143083	-3.63576	0.000277158	0.00983796	yes
244	AAEL005137-RA	5566046	tetraspanin-11	224.73	256.833	317.462	221.115	201.697	192.74	171.627	141.024	215.904	-0.524571	0.168546	-3.11232	0.0018562	0.0439493	yes
676	AAEL014453-RA	5564471	uncharacterized LOC5564471	124.447	163.936	127.396	128.449	109.057	87.494	86.4586	92.5805	114.977	-0.524859	0.159514	-3.29037	0.00100057	0.0274566	yes
462	AAEL009751-RA	5572357	protein msta	186.067	156.91	159.245	148.634	138.374	115.391	99.3629	92.5805	137.07	-0.52488	0.164306	-3.19453	0.00140056	0.0352264	yes
369	AAEL007787-RC	5569629	5-aminolevulinate synthase, nonspecific, mitochondrial	486.915	537.867	366.776	486.27	360.592	376.605	289.056	276.665	397.593	-0.526165	0.156338	-3.36557	0.000763856	0.0220345	yes
63	AAEL001387-RI	5570328	folliculin-interacting protein 2	152.236	129.588	132.533	137.624	98.5033	83.6899	81.2969	114.111	116.198	-0.531055	0.145218	-3.65695	0.000255238	0.00925951	yes
764	AAEL019798-RA	5575401	venom allergen 5	4504.27	4122.61	4809.19	4481.94	3259.4	3574.57	2895.72	2625.63	3784.17	-0.536004	0.105645	-5.07363	3.9e-07	3.23e-05	yes
833	AAEL022373-RD	5567357	moesin/ezrin/radixin homolog 2	265.81	183.452	201.367	187.168	137.787	164.844	150.98	122.723	176.766	-0.538865	0.162292	-3.32034	0.000899087	0.0253211	yes
896	AAEL026217-RA	5566990	myosin heavy chain, muscle	18650.2	21063.5	25889.1	18762.7	15963.4	13422.1	13682.4	14913	17793.3	-0.540955	0.123136	-4.39316	1.12e-05	0.00065872	yes
285	AAEL006216-RF	5567620	glycogen-binding subunit 76A	660.9	630.764	797.25	688.118	469.649	445.078	518.752	474.744	585.657	-0.541476	0.0938899	-5.76714	8.06e-09	8.9e-07	yes
220	AAEL004631-RA	5565155	actin-87E	6200.62	7729.98	8037.23	6698.6	5540.22	4772.86	4260.99	5090.85	6041.42	-0.54333	0.115441	-4.70658	2.52e-06	0.000173371	yes
750	AAEL019617-RF	5571277	myocyte-specific enhancer factor 2	123.239	135.833	130.478	133.954	90.881	67.2055	82.5873	115.187	109.921	-0.549973	0.168725	-3.25958	0.00111576	0.0296668	yes
272	AAEL005964-RA	5567309	actin, indirect flight muscle	128.072	202.969	184.929	138.541	110.23	106.514	112.267	118.417	137.742	-0.554855	0.179737	-3.08703	0.00202165	0.0468813	yes
377	AAEL007920-RC	5569782	MOB kinase activator-like 2	428.92	569.873	461.296	458.745	317.79	404.501	269.699	316.496	403.415	-0.555818	0.145757	-3.81331	0.000137116	0.00560084	yes
563	AAEL011763-RA	5575366	phenoloxidase 2	1028.2	1030.46	997.59	964.283	485.48	713.9	833.616	707.272	845.1	-0.557589	0.154655	-3.60538	0.000311699	0.010955	yes
822	AAEL021838-RA	110678344	myosin heavy chain, muscle-like	5347.61	5117.15	5501.64	5784.78	3033.08	4081.79	4175.82	3497.6	4567.43	-0.557736	0.110825	-5.03258	4.84e-07	3.91e-05	yes
752	AAEL019656-RG	5579456	AMP deaminase 2	635.527	580.803	567.116	622.059	399.876	371.533	340.673	514.575	504.02	-0.56174	0.130515	-4.30402	1.68e-05	0.000942261	yes
82	AAEL001808-RB	5572461	uncharacterized LOC5572461	233.188	164.717	184.929	211.94	114.92	148.359	109.686	165.784	166.69	-0.561871	0.182174	-3.08425	0.00204064	0.0470668	yes
757	AAEL019720-RD	5576979	trichohyalin	691.105	626.08	963.687	647.749	469.649	414.646	548.431	550.1	613.931	-0.562427	0.167026	-3.3673	0.000759091	0.0219266	yes
646	AAEL013866-RB	5578829	WD repeat-containing protein 44	315.347	327.092	350.338	310.112	255.053	173.72	220.663	222.839	271.895	-0.565414	0.123123	-4.59228	4.38e-06	0.000281808	yes
54	AAEL001295-RA	5569811	protein takeout	601.696	488.686	517.802	497.28	400.463	284.039	345.834	381.087	439.611	-0.56757	0.126128	-4.49995	6.8e-06	0.000416857	yes
917	AAEL027189-RC	5569487	uncharacterized LOC5569487	840.925	875.888	1010.95	1081.72	790.958	466.635	585.854	707.272	795.025	-0.575211	0.172066	-3.34297	0.000828874	0.0235607	yes
892	AAEL026044-RA	110681488	uncharacterized LOC110681488	567.866	494.151	454.104	589.029	265.607	429.862	419.389	301.425	440.179	-0.578027	0.18136	-3.18719	0.00143664	0.0360068	yes
904	AAEL026535-RB	5577812	uncharacterized LOC5577812	376.966	369.247	380.132	422.046	236.291	219.369	238.729	339.103	322.735	-0.583532	0.146347	-3.98732	6.68e-05	0.00301756	yes
758	AAEL019726-RP	5574086	collagen alpha-1(XVIII) chain	103.907	122.562	143.834	149.551	101.435	84.958	85.1682	72.1266	107.943	-0.587145	0.179433	-3.27223	0.00106702	0.0289416	yes
130	AAEL002835-RD	5576242	oxidative stress-induced growth inhibitor 2	544.91	651.842	817.798	622.976	399.29	349.976	481.329	522.111	548.779	-0.590886	0.168085	-3.5154	0.000439092	0.0143267	yes
596	AAEL012475-RC	5576383	JNK-interacting protein 3	246.478	292.743	298.969	302.772	182.348	150.895	223.244	203.462	237.614	-0.591243	0.133882	-4.41615	1e-05	0.000599043	yes
882	AAEL025330-RA	110681114	fatty acid-binding protein-like	509.871	343.485	495.199	371.584	289.646	251.07	292.927	301.425	356.901	-0.594693	0.154877	-3.83978	0.000123145	0.0050884	yes
395	AAEL008356-RB	5570461	protein spinster	1742.26	1368.48	1277.04	1387.25	1041.91	907.909	874.909	973.171	1196.62	-0.601251	0.112985	-5.32151	1.03e-07	9.41e-06	yes
870	AAEL024887-RA	5576537	uncharacterized LOC5576537	398.715	405.157	383.214	424.798	251.535	313.203	232.277	268.053	334.619	-0.603868	0.0985411	-6.12808	8.89e-10	1.08e-07	yes
619	AAEL013059-RA	5577181	uncharacterized LOC5577181	80.9511	103.826	91.4372	83.4917	54.5286	68.4736	49.0362	66.7441	74.8111	-0.605432	0.182086	-3.32497	0.00088427	0.0249366	yes
31	AAEL000729-RD	5566288	RNA-binding protein Musashi homolog Rbp6	259.769	269.324	268.147	369.749	186.453	154.7	240.019	187.314	241.934	-0.605902	0.17417	-3.4788	0.000503667	0.0159948	yes
799	AAEL020936-RB	5566344	carbonic anhydrase 1	276.684	234.975	318.489	299.102	184.694	199.081	138.076	215.303	233.3	-0.610746	0.160004	-3.81705	0.000135054	0.00552716	yes
914	AAEL027099-RB	110674205	collagen alpha chain CG42342	120.823	122.562	165.409	131.201	96.7443	69.7416	82.5873	99.0396	111.013	-0.61859	0.175151	-3.53174	0.000412828	0.0135732	yes
428	AAEL009173-RA	5571586	fasciclin-2	86.9923	104.607	86.3003	100.007	63.3235	54.5253	80.0065	49.5198	78.1601	-0.620296	0.189369	-3.2756	0.00105437	0.0286756	yes
291	AAEL006372-RA	5567927	sodium-independent sulfate anion transporter	275.476	395.789	333.9	306.442	289.646	173.72	184.531	197.003	269.563	-0.625688	0.198048	-3.15928	0.00158162	0.0389563	yes
408	AAEL008680-RB	5570952	ubiquitin-related modifier 1 homolog	662.108	661.99	722.251	649.584	515.383	442.542	327.768	451.061	554.086	-0.627397	0.132856	-4.72238	2.33e-06	0.000162517	yes
273	AAEL005985-RA	5579871	autophagy-related protein 13 homolog	531.619	409.841	382.187	555.082	342.416	368.996	207.759	290.66	386.07	-0.631617	0.204777	-3.08441	0.00203956	0.0470668	yes
104	AAEL002260-RC	5574085	trafficking protein particle complex subunit 11	94.2416	112.413	92.4646	114.686	59.8056	60.8654	67.1022	81.8153	85.4243	-0.633227	0.173543	-3.64883	0.000263441	0.00942926	yes
307	AAEL006568-RA	5568136	serine protease easter	1684.27	1519.92	1529.78	1886.36	851.936	1011.89	1420.76	985.013	1361.24	-0.634848	0.163097	-3.89247	9.92e-05	0.00422253	yes
597	AAEL012482-RB	5576397	E3 ubiquitin-protein ligase RNF19B	143.779	118.659	158.217	172.488	114.92	76.0818	92.9107	92.5805	121.205	-0.636557	0.185773	-3.42653	0.000611335	0.0185724	yes
282	AAEL006180-RD	5567586	solute carrier family 12 member 1	160.694	161.594	149.998	149.551	104.953	130.607	94.2012	69.9736	127.697	-0.639111	0.181334	-3.52449	0.000424292	0.0139074	yes
738	AAEL019503-RB	5571245	protein phosphatase 1 regulatory subunit 16A	206.607	175.646	199.313	186.251	170.622	102.71	90.3299	116.264	155.968	-0.655909	0.209071	-3.13725	0.00170539	0.0411987	yes
156	AAEL003487-RE	5578220	arf-GAP with SH3 domain, ANK repeat and PH domain-containing protein 2	273.059	250.588	222.942	258.732	122.543	140.751	223.244	155.018	205.86	-0.6589	0.190743	-3.45439	0.000551544	0.0171838	yes
69	AAEL001476-RB	5570900	protein numb	138.946	184.233	138.697	162.396	112.575	95.1022	78.716	101.193	126.482	-0.677333	0.165759	-4.08626	4.38e-05	0.00213741	yes
292	AAEL006372-RB	5567927	sodium-independent sulfate anion transporter	1452.29	1171.75	1322.24	1195.49	797.407	786.178	730.382	892.433	1043.52	-0.678621	0.0956066	-7.09806	1.27e-12	1.97e-10	yes
642	AAEL013612-RC	5578300	slit homolog 1 protein	364.884	295.866	321.571	279.835	216.942	205.421	154.851	203.462	255.354	-0.680279	0.135997	-5.00216	5.67e-07	4.56e-05	yes
580	AAEL012101-RB	5575826	tubulin alpha-1A chain	76.1182	73.381	67.8074	75.2343	50.4243	50.7212	36.132	41.9842	58.9753	-0.687434	0.187457	-3.66715	0.000245271	0.008974	yes
10	AAEL000194-RA	5570029	phosphatidylinositol 4-kinase alpha	547.326	879.791	554.788	781.702	513.624	419.718	380.676	396.158	559.223	-0.691144	0.188073	-3.67488	0.000237965	0.00875155	yes
176	AAEL003881-RA	5579170	ubiquitin	396.298	254.491	214.723	287.175	176.485	167.38	183.241	183.008	232.85	-0.695264	0.190597	-3.64782	0.000264475	0.00945045	yes
793	AAEL020342-RA	110676147	uncharacterized LOC110676147	685.064	546.454	605.129	591.782	347.107	374.069	487.781	287.43	490.602	-0.701092	0.161539	-4.34009	1.42e-05	0.000821702	yes
535	AAEL011248-RC	5574614	innexin inx3	187.275	131.93	123.286	141.294	87.9493	67.2055	114.848	86.1214	117.489	-0.710046	0.207269	-3.42573	0.000613151	0.0185891	yes
748	AAEL019596-RG	5569675	insulin receptor substrate 1-B	111.157	86.652	79.1086	95.4191	58.0466	54.5253	72.2639	41.9842	74.8945	-0.714672	0.209585	-3.40994	0.000649762	0.0193968	yes
358	AAEL007633-RI	5569430	dihydropyrimidinase	297.224	178.769	230.134	215.61	131.924	142.019	185.821	101.193	185.337	-0.717809	0.223808	-3.20726	0.00134007	0.0342009	yes
736	AAEL019485-RC	5571230	serine/threonine-protein phosphatase 2B catalytic subunit 3	206.607	216.24	311.297	200.013	183.521	142.019	118.719	118.417	187.104	-0.720208	0.213374	-3.37533	0.00073727	0.021423	yes
933	AAEL027938-RG	5576722	sarcalumenin	461.542	341.924	465.405	502.785	284.37	266.286	236.148	279.894	354.794	-0.725589	0.139226	-5.21159	1.87e-07	1.62e-05	yes
763	AAEL019797-RA	5575400	venom allergen 5	6457.97	5811.15	6370.81	5910.48	3914.33	4649.86	3628.68	2634.24	4922.19	-0.72751	0.160393	-4.53581	5.74e-06	0.000359135	yes
91	AAEL001951-RB	5572985	actin, indirect flight muscle	65.2442	61.6712	83.2181	80.7392	46.32	39.3089	49.0362	39.8311	58.1711	-0.729934	0.203793	-3.58174	0.000341307	0.0117638	yes
493	AAEL010506-RA	5573467	guanine nucleotide-binding protein G(q) subunit alpha	397.506	517.57	566.089	607.379	222.805	453.954	269.699	316.496	418.937	-0.730812	0.233208	-3.13374	0.00172596	0.0415083	yes
393	AAEL008347-RA	5570448	uncharacterized LOC5570448	497.789	529.28	536.295	470.673	330.103	330.956	249.052	305.731	406.235	-0.735548	0.103147	-7.13106	9.96e-13	1.59e-10	yes
153	AAEL003425-RB	5578122	uncharacterized LOC5578122	117.198	109.291	157.19	99.089	82.6724	78.6178	52.9075	72.1266	96.1365	-0.738512	0.216425	-3.41232	0.000644121	0.0192552	yes
118	AAEL002633-RC	5575451	probable cytochrome P450 9f2	166.735	185.794	157.19	224.785	95.5716	115.391	114.848	117.34	147.207	-0.744614	0.157608	-4.72449	2.31e-06	0.000161368	yes
457	AAEL009669-RA	5572233	uncharacterized LOC5572233	78.5347	96.0198	98.6289	97.254	42.2157	68.4736	65.8118	49.5198	74.5573	-0.746978	0.210701	-3.54521	0.000392304	0.0130793	yes
52	AAEL001293-RE	5569815	clavesin-1	439.794	446.531	452.049	411.036	220.46	205.421	254.214	361.71	348.902	-0.749308	0.17651	-4.24513	2.18e-05	0.0011868	yes
207	AAEL004353-RA	5564644	uncharacterized LOC5564644	264.601	265.421	249.654	283.505	172.967	149.627	129.043	171.166	210.748	-0.755377	0.113747	-6.64085	3.12e-11	4.28e-09	yes
637	AAEL013515-RA	5578131	flexible cuticle protein 12	1866.71	1544.9	1314.02	1627.63	791.544	938.342	1210.42	824.612	1264.77	-0.756642	0.16274	-4.64939	3.33e-06	0.000217556	yes
376	AAEL007889-RC	5569731	spondin-1	386.632	299.769	443.83	597.287	222.219	318.275	216.792	265.9	343.838	-0.757604	0.228412	-3.31683	0.000910441	0.0255736	yes
743	AAEL019550-RN	5570893	dual specificity tyrosine-phosphorylation-regulated kinase 2	144.987	81.9681	108.903	98.1715	63.9099	48.1851	70.9735	71.0501	86.0185	-0.760916	0.23267	-3.27036	0.0010741	0.0290645	yes
694	AAEL015116-RA	5566258	phenoloxidase 2	821.594	758.01	778.757	698.211	330.69	491.995	503.266	483.356	608.235	-0.762869	0.143969	-5.29884	1.17e-07	1.06e-05	yes
825	AAEL021888-RA	5566631	hexamerin-1.1	434.961	316.943	288.695	397.274	196.42	216.833	214.211	213.15	284.811	-0.775137	0.148169	-5.23145	1.68e-07	1.47e-05	yes
648	AAEL013936-RC	5578955	serine protease inhibitor 28Dc	79.7429	88.9939	76.0265	84.4092	53.9423	36.7728	45.1649	52.7493	64.7252	-0.781975	0.186353	-4.19619	2.71e-05	0.001431	yes
871	AAEL024906-RA	110678055	F-box/LRR-repeat protein 2-like	172.776	161.594	237.326	161.478	109.644	114.123	81.2969	113.034	143.909	-0.802792	0.184281	-4.35634	1.32e-05	0.00076924	yes
533	AAEL011222-RA	5574548	scavenger receptor class B member 1	751.517	597.977	627.732	579.854	358.833	346.172	396.161	345.562	500.476	-0.819779	0.103587	-7.91388	2.49e-15	4.41e-13	yes
243	AAEL005109-RA	5566006	cilia- and flagella-associated protein 44	397.506	383.298	350.338	266.99	199.352	188.936	238.729	148.559	271.714	-0.850857	0.180531	-4.71308	2.44e-06	0.000168469	yes
204	AAEL004320-RA	5564550	zinc finger MYM-type protein 4	310.514	282.595	391.433	403.696	203.456	162.308	221.953	178.702	269.332	-0.854511	0.160506	-5.32387	1.02e-07	9.36e-06	yes
643	AAEL013612-RD	5578300	slit homolog 1 protein	1395.5	1321.64	1142.45	1114.75	752.846	659.375	610.372	706.195	962.891	-0.861767	0.104295	-8.26278	1.42e-16	2.7e-14	yes
120	AAEL002646-RC	5575446	cytohesin-1	225.938	199.065	184.929	218.363	126.647	133.143	85.1682	105.499	159.844	-0.866205	0.154165	-5.61868	1.92e-08	2.02e-06	yes
754	AAEL019682-RM	5571120	protein muscleblind	283.933	311.479	287.668	260.567	141.892	262.482	107.105	113.034	221.02	-0.876353	0.279436	-3.13615	0.00171182	0.041261	yes
382	AAEL008046-RA	5569951	ammonium transporter Rh type A	155.861	141.297	131.505	124.779	78.5681	95.1022	74.8448	52.7493	106.838	-0.877618	0.185689	-4.72628	2.29e-06	0.000160474	yes
101	AAEL002185-RA	5573903	adult cuticle protein 1	987.121	1368.48	1302.72	1106.49	788.026	601.046	638.761	476.897	908.693	-0.925741	0.171207	-5.40715	6.4e-08	6.2e-06	yes
44	AAEL001119-RC	5568569	DNA-binding protein Ewg	117.198	109.291	139.724	69.7293	66.2552	55.7933	50.3266	53.8259	82.7679	-0.931897	0.250433	-3.72115	0.000198321	0.00752636	yes
739	AAEL019513-RH	5576390	sodium/calcium exchanger 1	166.735	152.226	208.559	125.696	72.7048	79.8858	117.429	69.9736	124.151	-0.951244	0.231464	-4.10969	3.96e-05	0.00196758	yes
296	AAEL006439-RF	5568002	dual specificity protein phosphatase 3	340.72	491.028	332.873	521.135	137.787	216.833	314.864	202.385	319.703	-0.959069	0.268217	-3.57571	0.000349272	0.0119422	yes
655	AAEL014041-RB	5577722	rho GTPase-activating protein gacF	55.5784	72.6003	68.8348	72.4818	41.6294	36.7728	18.066	39.8311	50.7243	-0.961997	0.273882	-3.51246	0.000443985	0.0144423	yes
154	AAEL003466-RC	5578219	cullin-4A	201.774	153.788	133.56	189.921	95.5716	103.978	90.3299	57.0554	128.247	-0.965885	0.223556	-4.32054	1.56e-05	0.000886024	yes
592	AAEL012239-RA	5576009	WD repeat-containing protein 63	32.6221	39.0324	40.068	41.2871	22.2805	11.4123	24.5181	18.3008	28.6902	-0.983688	0.301483	-3.26283	0.00110307	0.0294898	yes
66	AAEL001434-RG	5570531	coronin-1C	176.401	142.859	154.108	78.9042	91.4673	64.6695	69.6831	48.4433	103.317	-0.996998	0.305395	-3.26462	0.00109611	0.0294368	yes
801	AAEL020963-RA	110676150	uncharacterized LOC110676150	1159.9	1092.13	1092.11	840.422	426.847	727.849	461.973	477.974	784.9	-1.0009	0.18802	-5.32333	1.02e-07	9.36e-06	yes
795	AAEL020547-RB	5578803	furin-like protease 1	51.9537	95.2391	100.684	102.759	34.5934	44.381	56.7788	37.6781	65.5084	-1.03872	0.290977	-3.56975	0.000357321	0.0121398	yes
894	AAEL026132-RA	110679655	uncharacterized LOC110679655	72.4936	70.2584	62.6705	56.8844	30.4891	21.5565	49.0362	26.9129	48.7877	-1.04407	0.275311	-3.79234	0.000149232	0.00598049	yes
286	AAEL006216-RO	5567620	glycogen-binding subunit 76A	311.722	138.175	183.902	207.353	114.92	73.5457	85.1682	130.259	155.631	-1.04817	0.29197	-3.59	0.000330676	0.0114899	yes
911	AAEL026922-RA	5578825	beta-mannosidase	246.478	234.975	253.764	332.132	69.7731	101.442	192.274	149.636	197.559	-1.06617	0.302684	-3.52239	0.000427682	0.0139971	yes
529	AAEL011183-RA	5574465	uncharacterized LOC5574465	178.817	84.3101	101.711	97.254	45.7337	64.6695	55.4884	53.8259	85.2262	-1.07458	0.287017	-3.74397	0.000181136	0.0069731	yes
184	AAEL003973-RA	5579798	ell-associated factor Eaf	53.1619	77.2842	132.533	57.8019	37.5251	39.3089	27.099	41.9842	58.3372	-1.1332	0.358028	-3.16513	0.00155012	0.0382684	yes
367	AAEL007765-RG	5569575	serine protease inhibitor 42Dd	318.972	258.395	275.339	315.617	201.697	82.4219	72.2639	164.707	211.177	-1.15265	0.323156	-3.56684	0.000361306	0.012217	yes
691	AAEL015065-RB	5566099	spectrin alpha chain	134.113	79.6262	86.3003	72.4818	34.5934	63.4015	29.6798	38.7546	67.3688	-1.16716	0.319807	-3.64958	0.000262667	0.00942926	yes
103	AAEL002231-RA	5573924	adult cuticle protein 1	82.1594	71.039	54.4514	67.8943	30.4891	16.4844	42.5841	32.2955	49.6746	-1.17475	0.291876	-4.02482	5.7e-05	0.00262482	yes
711	AAEL018137-RC	5568971	uncharacterized LOC5568971	96.6581	102.265	94.5194	140.376	60.9782	58.3293	51.6171	18.3008	77.8805	-1.19275	0.358342	-3.32853	0.000873058	0.0246529	yes
144	AAEL003235-RB	5577601	larval cuticle protein LCP-30	2559.02	2315.4	2613.67	2891.93	996.759	1396.1	1251.71	878.438	1862.88	-1.20015	0.153359	-7.82572	5.05e-15	8.77e-13	yes
67	AAEL001434-RI	5570531	coronin-1C	159.486	155.349	206.504	236.713	102.608	51.9892	112.267	61.3615	135.785	-1.2012	0.282528	-4.25162	2.12e-05	0.00115589	yes
773	AAEL019849-RQ	5567708	uncharacterized LOC5567708	86.9923	96.8004	135.615	60.5544	53.9423	31.7007	30.9702	40.9077	67.1853	-1.24668	0.324666	-3.83987	0.000123099	0.0050884	yes
878	AAEL025030-RB	5564068	uncharacterized LOC5564068	109.949	78.0649	97.6015	60.5544	17.5899	51.9892	49.0362	27.9894	61.5968	-1.26352	0.392703	-3.21749	0.00129316	0.0331879	yes
770	AAEL019830-RF	5564565	tyrosine-protein kinase Fer	44.7044	49.9615	51.3692	72.4818	24.0395	30.4327	7.74256	27.9894	38.5901	-1.26866	0.394896	-3.21264	0.00131521	0.0336329	yes
931	AAEL027938-RB	5576722	sarcalumenin	326.221	370.808	435.611	345.894	188.212	178.792	36.132	173.319	256.874	-1.35505	0.4159	-3.25811	0.00112158	0.0297105	yes
742	AAEL019533-RG	5571312	inositol hexakisphosphate and diphosphoinositol-pentakisphosphate kinase 2	68.8689	31.2259	43.1501	47.7095	20.5215	19.0204	7.74256	24.7599	32.8749	-1.37905	0.41869	-3.29372	0.000988694	0.0273058	yes
692	AAEL015065-RD	5566099	spectrin alpha chain	241.645	219.362	162.327	104.594	75.6364	81.1539	50.3266	69.9736	125.627	-1.38776	0.293423	-4.72955	2.25e-06	0.000158432	yes
16	AAEL000328-RE	5575162	zinc-type alcohol dehydrogenase-like protein C1773.06c	298.432	281.814	325.681	380.759	155.963	139.483	107.105	49.5198	217.345	-1.50375	0.311309	-4.83041	1.36e-06	0.000101262	yes
734	AAEL019461-RE	5567962	protein timeless	103.907	79.6262	144.861	80.7392	43.9747	5.07212	41.2937	38.7546	67.2786	-1.65181	0.529827	-3.11763	0.00182309	0.043328	yes
937	AAEL028237-RK	5565233	focal adhesion kinase 1	106.324	42.155	88.3551	80.7392	11.1402	34.2368	25.8085	15.0712	50.4787	-1.90872	0.451339	-4.22902	2.35e-05	0.00126281	yes
714	AAEL018174-RC	5568595	dual specificity protein phosphatase Mpk3	107.532	46.0583	86.3003	91.7491	6.44962	22.8245	30.9702	27.9894	52.4842	-1.93745	0.500504	-3.87101	0.000108387	0.00454887	yes
553	AAEL011471-RF	5574866	60S ribosomal protein L17	1326.63	1189.71	1571.9	793.63	212.251	266.286	223.244	131.335	714.373	-2.55208	0.257625	-9.90617	3.91e-23	9.97e-21	yes
402	AAEL008556-RI	5570788	serine/threonine-protein kinase PRP4 homolog	85.784	42.155	55.4788	86.2441	14.0719	0	0	0	35.4667	-4.15846	1.31101	-3.17194	0.00151424	0.0375996	yes
474	AAEL010005-RB	5572728	uncharacterized LOC5572728	24.1645	8.58713	10.2738	52.297	3.51797	0	0	0	12.3551	-4.45679	1.30837	-3.40637	0.00065833	0.0195436	yes
864	AAEL024346-RD	5572048	F-actin-uncapping protein LRRC16A	16.9152	3.90324	47.2597	9.17491	0	0	0	3.22955	10.0603	-4.61953	1.47471	-3.13251	0.0017332	0.0416357	yes
72	AAEL001532-RF	5571110	protein yippee-like CG15309	12.0823	13.271	11.3012	11.0099	0	0	0	0	5.95805	-6.00755	1.1596	-5.1807	2.21e-07	1.89e-05	yes
611	AAEL012887-RB	110678020	latrophilin-like protein LAT-2	15.7069	13.271	13.356	9.17491	0	0	0	0	6.43861	-6.11304	1.17465	-5.20416	1.95e-07	1.68e-05	yes
928	AAEL027790-RG	5579824	microtubule-associated protein futsch	117.198	65.5745	201.367	54.132	4.69063	0	0	0	55.3703	-6.18051	0.978384	-6.31705	2.67e-10	3.4e-08	yes
746	AAEL019574-RA	5573450	transcriptional regulator ATRX homolog	7.24936	14.0517	22.6025	10.0924	0	0	0	0	6.74949	-6.18864	1.27471	-4.85494	1.2e-06	9.01e-05	yes
766	AAEL019805-RA	5575783	uncharacterized LOC5575783	26.581	23.4195	4.10954	3.66996	0	0	0	0	7.22249	-6.28215	1.5721	-3.99602	6.44e-05	0.00293352	yes
641	AAEL013565-RF	5578225	calcium uniporter protein, mitochondrial	0	24.9808	15.4108	19.2673	0	0	0	0	7.45735	-6.33269	2.03972	-3.10469	0.00190477	0.0448955	yes
774	AAEL019849-RT	5567708	uncharacterized LOC5567708	16.9152	16.3936	21.5751	8.25742	0	0	0	0	7.89266	-6.40871	1.2133	-5.28204	1.28e-07	1.14e-05	yes
274	AAEL006035-RE	5567364	RNA polymerase II elongation factor Ell	30.2056	15.613	0	18.3498	0	0	0	0	8.02105	-6.43375	2.07876	-3.09499	0.00196821	0.0459909	yes
787	AAEL019965-RH	5575771	E3 ubiquitin-protein ligase RBBP6	0	13.271	15.4108	35.7821	0	0	0	0	8.05799	-6.44332	2.08396	-3.09186	0.00198907	0.046377	yes
823	AAEL021839-RA	5574577	protein pellino	20.5398	15.613	0	30.2772	0	0	0	0	8.30375	-6.485	2.07551	-3.12454	0.00178086	0.0424471	yes
221	AAEL004669-RL	5565217	protein Fe65 homolog	22.9563	11.7097	0	33.0297	0	0	0	0	8.46196	-6.51177	2.10141	-3.09876	0.00194329	0.0455079	yes
907	AAEL026782-RC	5577902	DENN domain-containing protein 1A	19.3316	77.2842	8.21908	16.5148	0	0	1.29043	0	15.33	-6.63286	1.4049	-4.72123	2.34e-06	0.000162912	yes
716	AAEL018234-RC	5563832	potassium voltage-gated channel subfamily KQT member 1	19.3316	10.9291	13.356	30.2772	0	0	0	0	9.23674	-6.63679	1.23215	-5.38635	7.19e-08	6.87e-06	yes
196	AAEL004217-RI	5564358	serine/threonine-protein kinase 32A	0	39.0324	20.5477	14.6799	0	0	0	0	9.2825	-6.64819	2.06659	-3.21698	0.00129546	0.0332072	yes
68	AAEL001464-RF	5570699	lysoplasmalogenase-like protein TMEM86A	25.3727	7.80649	7.19169	34.8647	0	0	0	0	9.40445	-6.66202	1.40663	-4.73614	2.18e-06	0.000153871	yes
721	AAEL018293-RF	5575159	cysteine/serine-rich nuclear protein 1	21.7481	36.6905	17.4655	0	0	0	0	0	9.48801	-6.67767	2.09509	-3.1873	0.0014361	0.0360068	yes
741	AAEL019530-RA	5568519	AF4/FMR2 family member 4	0	17.1743	24.6572	35.7821	0	0	0	0	9.70171	-6.71075	2.04041	-3.28893	0.0010057	0.0275268	yes
446	AAEL009428-RH	5571941	ralBP1-associated Eps domain-containing protein 1	35.0386	28.1034	0	18.3498	0	0	0	0	10.1865	-6.77933	2.06075	-3.28973	0.00100283	0.0274834	yes
817	AAEL021698-RE	5574207	uncharacterized LOC5574207	59.2031	6.24519	16.4382	1.83498	0	0	0	0	10.4652	-6.81324	1.75014	-3.89298	9.9e-05	0.00422202	yes
348	AAEL007449-RB	5569187	protein Gawky	41.0797	16.3936	0	26.6072	0	0	0	0	10.5101	-6.82364	2.07638	-3.28631	0.00101508	0.0277481	yes
936	AAEL028110-RG	5578948	disheveled-associated activator of morphogenesis 1	36.2468	37.4711	11.3012	0	0	0	0	0	10.6274	-6.84048	2.1275	-3.21527	0.00130323	0.0333664	yes
839	AAEL022803-RA	110680552	LMBR1 domain-containing protein 2 homolog	38.6632	5.46454	0	50.462	0	0	0	0	11.8237	-6.99387	2.20517	-3.17158	0.00151611	0.0376024	yes
765	AAEL019804-RF	23687582	muscarinic acetylcholine receptor M3	48.329	24.9808	0	24.7723	0	0	0	0	12.2603	-7.04612	2.05518	-3.42847	0.000606994	0.0185337	yes
46	AAEL001142-RB	5568568	protein sprint	49.5373	22.6388	27.7394	0	0	0	0	0	12.4894	-7.07222	2.07521	-3.40795	0.000654531	0.0194881	yes
784	AAEL019939-RU	5577073	supervillin	43.4961	35.9098	0	21.1023	0	0	0	0	12.5635	-7.08198	2.04932	-3.45577	0.000548714	0.0171706	yes
820	AAEL021826-RC	5572440	probable nuclear hormone receptor HR38	43.4961	43.7163	0	29.3597	0	0	0	0	14.5715	-7.29624	2.02219	-3.60808	0.000308468	0.0108593	yes
771	AAEL019833-RAA	5566385	zinc finger protein 420	56.7866	23.4195	0	36.6996	0	0	0	0	14.6132	-7.29943	2.04555	-3.56845	0.0003591	0.0121685	yes
70	AAEL001493-RC	5570897	laminin subunit alpha-1	0	42.155	57.5335	22.0198	0	0	0	0	15.2135	-7.35928	2.0207	-3.64195	0.000270578	0.00963637	yes
252	AAEL005347-RB	5566382	breast cancer anti-estrogen resistance protein 3	0	44.497	53.424	25.6897	0	0	0	0	15.4513	-7.38177	2.00429	-3.68298	0.000230524	0.0086118	yes
719	AAEL018288-RAB	5576237	dystonin	0	60.1099	55.4788	25.6897	0	0	0	0	17.6598	-7.57456	2.0023	-3.78294	0.000154989	0.00614665	yes
389	AAEL008144-RC	5570163	long-chain fatty acid transport protein 4	0	41.3744	72.9443	27.5247	0	0	0	0	17.7304	-7.57986	2.0087	-3.77351	0.000160964	0.00636834	yes
551	AAEL011436-RB	5574835	myosin-VIIa	37.455	0	72.9443	33.9472	0	0	0	0	18.0433	-7.60356	2.06558	-3.68108	0.00023225	0.00864535	yes
776	AAEL019855-RL	5564725	serine/threonine-protein kinase 10	41.0797	24.2001	65.7526	16.5148	0	0	0	0	18.4434	-7.63276	1.24145	-6.14829	7.83e-10	9.63e-08	yes
394	AAEL008354-RA	5570466	gamma-aminobutyric acid receptor subunit beta	0	38.2518	44.1775	72.4818	0	0	0	0	19.3639	-7.70722	1.97966	-3.8932	9.89e-05	0.00422202	yes
431	AAEL009196-RD	5571620	calpain-11	0	29.6646	66.78	63.3069	0	0	0	0	19.9689	-7.75128	1.98771	-3.8996	9.64e-05	0.00413296	yes
306	AAEL006567-RG	5568147	mucin-5AC	0	43.7163	20.5477	99.089	0	0	0	0	20.4191	-7.78388	2.04911	-3.79867	0.000145473	0.00588212	yes
331	AAEL007129-RF	5568775	zwei Ig domain protein zig-8	25.3727	56.2067	43.1501	50.462	0	0	0	0	21.8989	-7.89019	1.11604	-7.06979	1.55e-12	2.36e-10	yes
769	AAEL019825-RB	23687579	ubiquitin carboxyl-terminal hydrolase 7	68.8689	40.5937	0	67.8943	0	0	0	0	22.1696	-7.90134	1.98634	-3.97784	6.95e-05	0.00312716	yes
270	AAEL005950-RG	5567294	chloride channel protein 2	0	72.6003	24.6572	88.9966	0	0	0	0	23.2818	-7.97326	2.0063	-3.97412	7.06e-05	0.00316981	yes
405	AAEL008641-RM	5570867	G protein alpha o subunit	35.0386	0	36.9858	114.686	0	0	0	0	23.3388	-7.97556	2.07856	-3.83706	0.000124516	0.00512757	yes
158	AAEL003569-RB	5578546	acyl-coenzyme A thioesterase 9, mitochondrial	50.7455	20.2969	0	121.109	0	0	0	0	24.0189	-8.01714	2.07328	-3.86689	0.000110234	0.00460829	yes
722	AAEL018306-RAA	5578934	calcium-activated potassium channel slowpoke	37.455	43.7163	31.8489	81.6567	0	0	0	0	24.3346	-8.03838	1.14794	-7.00247	2.51e-12	3.74e-10	yes
249	AAEL005255-RF	5566219	hepatic leukemia factor	44.7044	118.659	38.0132	16.5148	0	0	0	0	27.2364	-8.20096	1.31245	-6.24861	4.14e-10	5.21e-08	yes
140	AAEL003104-RH	5577066	RING finger protein nhl-1	76.1182	115.536	43.1501	0	0	0	0	0	29.3505	-8.30649	1.99388	-4.16599	3.1e-05	0.00160334	yes
429	AAEL009173-RJ	5571586	fasciclin-2	152.236	17.1743	90.4098	0	0	0	0	0	32.4776	-8.45144	2.08167	-4.05993	4.91e-05	0.00233484	yes
747	AAEL019576-RH	5564736	filamin-B	0	85.0907	142.806	34.8647	0	0	0	0	32.8452	-8.46902	1.97362	-4.29111	1.78e-05	0.000992075	yes
693	AAEL015110-RD	5566251	venom dipeptidyl peptidase 4	45.9126	100.704	70.8895	93.5841	0	0	0	0	38.8862	-8.7172	1.09394	-7.96862	1.6e-15	2.86e-13	yes
300	AAEL006472-RC	5568010	dmX-like protein 2	0	245.124	218.833	214.693	0	0	0	0	84.8312	-9.83759	2.71034	-3.62965	0.000283803	0.0100405	yes
