# Supplementary material for: Transcriptomics analysis of ethanol treatment of male Aedes aegypti reveals a small set of putative radioprotective genes
Source: Front Physiol. 2023 Jan 30;14:1120408. doi: 10.3389/fphys.2023.1120408 (PMC9922702; doi:10.3389/fphys.2023.1120408)
Supplement: Supplementary file 8 [file Table1.XLSX]

## Sheet: Sample sequencing statistics
Sample ID	# Reads	Yield (Mbases)	Mean Quality Score	% Bases >= 30
EtOH-control-1	23417264	7025	35.56	91.71
EtOH-control-2	31037874	9311	36.95	91.61
EtOH-control-3	25207451	7562	36.58	91.64
EtOH-control-4	41442232	12433	35.42	91.09
EtOH-xray-1	37177294	11154	37.28	91.71
EtOH-xray-2	22495974	6749	35.69	91.42
EtOH-xray-3	22915147	6874	35.58	90.52
EtOH-xray-4	25307750	7592	36.23	91.46
H2O-control-1	23558240	7068	35.84	91.06
H2O-control-2	29350329	8805	36.63	90.74
H2O-control-3	25607349	7682	36.18	90.79
H2O-control-4	38066890	11420	35.48	91.39
H2O-xray-1	25887258	7766	36.29	91.05
H2O-xray-2	24503046	7351	36.1	91.2
H2O-xray-3	24499026	7350	36.06	91.26
H2O-xray-4	23216679	6965	35.95	91.16
Overall	443689803	133107	36.12	91.25
Mean reads per sample	2.77306e+07
Mean yield (Mbases)	8319.19

## Sheet: Sequence read mapping statistic
Sample ID	Reads processed after trimming (bp)	Mapped Reads	% Mapped Reads	Reported paired-end alignments
EtOH-control-1	12250990	10064151	82.15	21754449
EtOH-control-2	17531258	14372123	81.98	31823821
EtOH-control-3	13727811	11231811	81.82	26676454
EtOH-control-4	20337996	13723128	67.48	29760169
EtOH-xray-1	22095716	17879966	80.92	40888422
EtOH-xray-2	11781803	9295351	78.9	21587414
EtOH-xray-3	11648023	9365204	80.4	19313772
EtOH-xray-4	13744344	11203333	81.51	23720395
H2O-control-1	12411980	9925153	79.96	24178565
H2O-control-2	15923200	12810751	80.45	27011052
H2O-control-3	13731647	11250700	81.93	24128391
H2O-control-4	19519586	14562027	74.6	31246092
H2O-xray-1	14289609	11838949	82.85	25686495
H2O-xray-2	12995141	10352027	79.66	21371105
H2O-xray-3	12956300	10367069	80.02	21769093
H2O-xray-4	12175978	9969088	81.88	20896347
Average	1.48201e+07	1.17632e+07	79.7819	2.57383e+07
